# Supplementary material for: Impact of pausing elective hip and knee replacement surgery during winter 2017 on subsequent service provision at a major NHS Trust: a descriptive observational study using interrupted time series
Source: PubMed Central journal article supplement (PMC10193088; doi:10.1136/bmjopen-2022-066398), 2023-05-16
Supplement: bmjopen-2022-066398.draft_revisions.pdf [file bmjopen-2022-066398.draft_revisions.pdf]

# BMJ Open

BMJ Open is committed to open peer review. As part of this commitment we make the peer review history of every article we publish publicly available.

When an article is published we post the peer reviewers' comments and the authors' responses online. We also post the versions of the paper that were used during peer review. These are the versions that the peer review comments apply to.

The versions of the paper that follow are the versions that were submitted during the peer review process. They are not the versions of record or the final published versions. They should not be cited or distributed as the published version of this manuscript.

BMJ Open is an open access journal and the full, final, typeset and author-corrected version of record of the manuscript is available on our site with no access controls, subscription charges or pay-per-view fees (<http://bmjopen.bmj.com>).

If you have any questions on BMJ Open's open peer review process please email [info.bmjopen@bmj.com](mailto:info.bmjopen@bmj.com)

# BMJ Open

## The impact of pausing elective hip and knee replacement surgery during winter 2017 on subsequent service provision at a major NHS Trust: a natural experiment

|                               |                                                                                                                                                                                                                                                                                                                                                                                                                                                                                                                                                                                                                                                                                                                                                                                                                                                                                                                                                                |
|-------------------------------|----------------------------------------------------------------------------------------------------------------------------------------------------------------------------------------------------------------------------------------------------------------------------------------------------------------------------------------------------------------------------------------------------------------------------------------------------------------------------------------------------------------------------------------------------------------------------------------------------------------------------------------------------------------------------------------------------------------------------------------------------------------------------------------------------------------------------------------------------------------------------------------------------------------------------------------------------------------|
| Journal:                      | <i>BMJ Open</i>                                                                                                                                                                                                                                                                                                                                                                                                                                                                                                                                                                                                                                                                                                                                                                                                                                                                                                                                                |
| Manuscript ID                 | bmjopen-2022-066398                                                                                                                                                                                                                                                                                                                                                                                                                                                                                                                                                                                                                                                                                                                                                                                                                                                                                                                                            |
| Article Type:                 | Original research                                                                                                                                                                                                                                                                                                                                                                                                                                                                                                                                                                                                                                                                                                                                                                                                                                                                                                                                              |
| Date Submitted by the Author: | 07-Jul-2022                                                                                                                                                                                                                                                                                                                                                                                                                                                                                                                                                                                                                                                                                                                                                                                                                                                                                                                                                    |
| Complete List of Authors:     | <p>Jones, Tim; University Hospitals Bristol and Weston NHS Foundation Trust, NIHR ARC West; University of Bristol, Department of Population Health Sciences</p> <p>Penfold, Chris; University Hospitals Bristol and Weston NHS Foundation Trust, NIHR ARC West; University of Bristol, Musculoskeletal Research Unit</p> <p>Redaniel, Maria Theresa; University Hospitals Bristol and Weston NHS Foundation Trust, NIHR ARC West; University of Bristol, Population Health Sciences, Bristol Medical School</p> <p>Eyles, Emily; University Hospitals Bristol and Weston NHS Foundation Trust, NIHR ARC West; University of Bristol, Population Health Sciences, Bristol Medical School</p> <p>Keen, Tim; North Bristol NHS Trust</p> <p>Elliott, Andrew; North Bristol NHS Trust</p> <p>Blom, AW; University of Bristol, Translational Health Sciences, Bristol Medical School</p> <p>Judge, Andrew; University of Bristol, Musculoskeletal Research Unit</p> |
| Keywords:                     | Knee < ORTHOPAEDIC & TRAUMA SURGERY, Hip < ORTHOPAEDIC & TRAUMA SURGERY, Orthopaedic & trauma surgery < SURGERY, Human resource management < HEALTH SERVICES ADMINISTRATION & MANAGEMENT                                                                                                                                                                                                                                                                                                                                                                                                                                                                                                                                                                                                                                                                                                                                                                       |
|                               |                                                                                                                                                                                                                                                                                                                                                                                                                                                                                                                                                                                                                                                                                                                                                                                                                                                                                                                                                                |

SCHOLARONE™  
Manuscripts

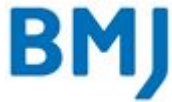

I, the Submitting Author has the right to grant and does grant on behalf of all authors of the Work (as defined in the below author licence), an exclusive licence and/or a non-exclusive licence for contributions from authors who are: i) UK Crown employees; ii) where BMJ has agreed a CC-BY licence shall apply, and/or iii) in accordance with the terms applicable for US Federal Government officers or employees acting as part of their official duties; on a worldwide, perpetual, irrevocable, royalty-free basis to BMJ Publishing Group Ltd ("BMJ") its licensees and where the relevant Journal is co-owned by BMJ to the co-owners of the Journal, to publish the Work in this journal and any other BMJ products and to exploit all rights, as set out in our [licence](#).

The Submitting Author accepts and understands that any supply made under these terms is made by BMJ to the Submitting Author unless you are acting as an employee on behalf of your employer or a postgraduate student of an affiliated institution which is paying any applicable article publishing charge ("APC") for Open Access articles. Where the Submitting Author wishes to make the Work available on an Open Access basis (and intends to pay the relevant APC), the terms of reuse of such Open Access shall be governed by a Creative Commons licence – details of these licences and which [Creative Commons](#) licence will apply to this Work are set out in our licence referred to above.

Other than as permitted in any relevant BMJ Author's Self Archiving Policies, I confirm this Work has not been accepted for publication elsewhere, is not being considered for publication elsewhere and does not duplicate material already published. I confirm all authors consent to publication of this Work and authorise the granting of this licence.

1  
2  
3 1 **Title:** The impact of pausing elective hip and knee replacement surgery during winter 2017 on  
4  
5 2 subsequent service provision at a major NHS Trust: a natural experiment  
6  
7  
8 3  
9  
10

11 4 **Authors:** Tim Jones<sup>1,2</sup>, Christopher Penfold<sup>1,2,3</sup>, Maria Theresa Redaniel<sup>1,2</sup>, Emily Eyles<sup>1,2</sup>, Tim Keen<sup>4</sup>,  
12  
13 5 Andrew Elliott<sup>4</sup>, Ashley Blom<sup>2,3</sup>, Andrew Judge<sup>3,5</sup>  
14  
15  
16 6  
17  
18

19 7 <sup>1</sup> NIHR ARC West, University Hospitals Bristol NHS Foundation Trust, Bristol, BS1 2NT, UK  
20  
21

22 8 <sup>2</sup> Department of Population Health Sciences, Bristol Medical School, University of Bristol, BS8 2PS,  
23  
24 9 UK  
25  
26

27 10 <sup>3</sup> Musculoskeletal Research Unit, Translational Health Sciences, Bristol Medical School, University of  
28  
29 11 Bristol, Learning and Research Building, Level 1, Southmead Hospital, Bristol, BS10 5NB, UK  
30  
31

32 12 <sup>4</sup> North Bristol NHS Trust, Southmead Hospital, Westbury-on-Trym, Bristol, BS10 5NB, UK  
33  
34

35 13 <sup>5</sup> National Institute for Health Research Bristol Biomedical Research Centre, University Hospitals  
36  
37 14 Bristol and Weston NHS Foundation Trust and University of Bristol, Bristol, UK  
38  
39  
40  
41  
42

43 16 **Corresponding author:**

44 17 Tim Jones  
45 18 Research Fellow  
46 19 NIHR ARC West,  
47 20 9<sup>th</sup> Floor Whitefriars,  
48 21 Lewin's Mead  
49 22 Bristol, BS1 2NT  
50 23 United Kingdom  
51  
52  
53

54 25 Tel: ++44 (0)117 342 1265

55 26 [Timothy.Jones@bristol.ac.uk](mailto:Timothy.Jones@bristol.ac.uk)  
56  
57

58 28 **Word count [3,560]**  
59  
60

1  
2  
3 30  
4 31  
5  
6 32  
7  
8 33  
9  
10 34  
11  
12  
13 35  
14  
15 36  
16  
17  
18 37  
19  
20 38  
21  
22  
23 39  
24  
25 40  
26  
27 41  
28  
29 42  
30  
31  
32 43  
33  
34 44  
35  
36 45  
37  
38 46  
39  
40 47  
41  
42 48  
43  
44 49  
45  
46 50  
47  
48 51  
49  
50 52  
51  
52 53  
53  
54 54  
55  
56 55  
57  
58 56  
59  
60

## ABSTRACT

**Objectives:** To explore the impact of a temporary cancellation of elective surgery in winter 2017 on trends in primary hip and knee replacement at a major NHS Trust, and whether lessons can be learnt about efficient surgery provision.

**Design and Setting:** Observational interrupted time series analysis using hospital records to explore trends in primary hip and knee replacement surgery at a major NHS Trust, as well as patient characteristics, 2016-2019.

**Intervention:** A temporary cancellation of elective services for two months in winter 2017

**Outcomes:** NHS-funded hospital admissions for primary hip or knee replacement, length of stay and bed occupancy. Additionally, we explored the ratio of elective to emergency admissions at the Trust as a measure of elective capacity, and the ratio of public to private provision of NHS-funded hip and knee surgery.

**Results:** After winter 2017 there was a sustained reduction in the number of knee replacements, a decrease in the proportion of most deprived people having knee replacements, and an increase in average age for knee replacement and comorbidity for both types of surgery. The ratio of public to private provision dropped after winter 2017, and elective capacity generally has reduced over time. There was clear seasonality in provision of elective surgery, with less-complex patients admitted during winter.

**Conclusions:** Declining elective capacity and seasonality has a marked effect on the provision of joint replacement, despite efficiency improvements in hospital treatment. The Trust has outsourced less complex patients to independent providers, and/or treated them during winter when capacity is most limited. There is a need to explore whether these are strategies that could be used explicitly to maximise the use of limited elective capacity, provide benefit to patients, and value for money for taxpayers.

1  
2  
3 55 **STRENGTH AND LIMITATIONS OF THIS STUDY**  
4  
5

- 6 56 • Trends analyses using data obtained from the electronic health records of a local hospital  
7  
8 NHS Trust are informative for clinicians and service managers in monitoring changes in  
9 57  
10 planning and delivery of elective surgery, and could be regularly updated in near real time  
11 58  
12 for monitoring.  
13 59  
14  
15 60 • The inclusion of wider hospital admissions data beyond the NHS Trust allows us to estimate  
16  
17 the proportion of people within the Trust catchment area having NHS-funded treatment at  
18 61  
19 independent providers.  
20 62  
21  
22 63 • We report the experience of one NHS Trust that is one of the larger elective orthopaedic  
23  
24 centres - the findings may not be generalisable to or reflect the experience of other trusts.  
25 64  
26  
27 65 • Our study does not include privately funded, privately provided hip and knee surgery which  
28  
29 may also have been changing over time.  
30 66  
31  
32 67  
33  
34  
35 68  
36  
37  
38 69  
39  
40  
41  
42 70  
43  
44  
45 71  
46  
47  
48 72  
49  
50  
51 73  
52  
53  
54  
55 74  
56  
57  
58 75  
59  
60

## 76 INTRODUCTION

77 Primary hip and knee replacement operations are common planned elective surgical procedures.

78 They are highly clinically effective for improving symptoms of pain and functional limitations, and

79 have been shown to be safe and cost-effective.<sup>1-4</sup> Around 100,000 hip<sup>4</sup> and over 100,000 knee

80 operations<sup>3</sup> are carried out each year in the UK. Demand for these operations has been increasing

81 substantially in recent decades<sup>5</sup> with an ageing population, rising levels of obesity, and widening

82 indications for surgery in younger patient groups.<sup>3 4</sup>

83 Orthopaedic services have become more efficient over time, with length of hospital stay for primary

84 hip and knee replacements reducing from around 15 days in 1997 to roughly 5.5 days in 2014.<sup>6</sup> This is

85 largely due to the introduction of 'fast track' surgery and enhanced recovery services,<sup>7</sup> which reduce

86 length of stay whilst maintaining patient safety and outcomes of surgery.<sup>6</sup> However, over the past

87 decade there has also been a reduction in the numbers of hospital beds and operating theatres

88 available for hip and knee replacement patients.<sup>8</sup> Waiting lists for orthopaedic procedures have been

89 growing over time, and the average time people wait for treatment once on the waiting list has also

90 increased.<sup>9</sup>

91 Pressures on elective surgery are exacerbated during winter, when resources for planned surgery are

92 often displaced by more acute, unplanned hospital admissions.<sup>8</sup> At the end of 2017, this led to all

93 planned elective hip and knee replacement operations in England being cancelled for the whole of

94 January.<sup>10</sup> Even before the COVID-19 pandemic, over half a million people were already on the waiting

95 list.<sup>11</sup> Patients are having to wait longer with deteriorating severe pain and functional limitation,

96 affecting their health and quality of life. The COVID-19 pandemic has had an even greater impact on

97 cancelling planned elective surgery, with over 635,000 people waiting for hip and knee replacements

98 in April 2021, more than 10% of these waiting over a year, and over a third waiting longer than the 18

99 week target.<sup>11</sup>

1  
2  
3 100 The winter of 2017 provides a form of 'natural experiment', where elective capacity was intentionally  
4  
5 101 reduced close to zero. A natural experimental design is a valid methodological approach to evaluate  
6  
7 102 the impact of a range of events, policies and interventions which are not under the control of  
8  
9  
10 103 researchers.<sup>12</sup> Researchers can use the variation in exposure that natural experiments generate to  
11  
12 104 analyse their impact on health outcomes. This provides a form of quasi-experimental study, where we  
13  
14 105 can explore trends in provision of elective surgery before and after Winter 2017, which is a robust  
15  
16 106 approach to explore real-world impact when randomisation is not possible.<sup>13 14</sup>  
17  
18  
19 107 Our aim was to understand what happens after common, planned elective surgery is temporarily  
20  
21 108 cancelled, and how this might inform optimum planning of elective surgery when capacity is limited,  
22  
23 109 such as following the COVID-19 pandemic. We used interrupted time series analysis to model trends  
24  
25 110 in elective hip and knee replacement surgery for a major NHS Trust from 2016 to 2019 and see how  
26  
27 111 these were impacted by the withdrawal of elective surgery in winter 2017. We explored these trends  
28  
29 112 by patient factors (age, sex, deprivation, number of comorbidities) and seasonality to see when  
30  
31 113 demand was highest for different patient groups.  
32  
33  
34  
35  
36 114

## 37 115 **METHODS**

38  
39  
40  
41 116 This study is a longitudinal observational study using routinely collected administrative information  
42  
43 117 about patients admitted to a major NHS Trust for elective hip and knee replacements, 2016 to 2019.  
44  
45 118 It was developed and reported according to the RECORD extension<sup>15</sup> to STROBE guidelines for  
46  
47 119 observational studies using routinely collected data.  
48  
49  
50

### 51 120 **Data Sources**

52  
53 121 We used two data sources for our analyses. The first was an extract of elective primary hip and knee  
54  
55 122 replacement inpatient admissions identified from the Trust's electronic medical records (EMR)  
56  
57 123 between 1<sup>st</sup> January 2016 and 31<sup>st</sup> December 2019. Up to 29 diagnoses were provided per entry using  
58  
59 124 the International Classification of Diseases version 10 (ICD-10), and up to 11 procedures were provided



1  
2  
3 125 per entry using the Office of Population Censuses and Surveys Classification of Interventions and  
4  
5 126 Procedures version 4 (OPCS-4). The extract included patient demographics such as age, sex,  
6  
7 127 deprivation quintile, and comorbidities; and other characteristics of the hospital admissions such as  
8  
9  
10 128 length of stay. This data source was used for all analyses of hip and knee replacements at the Trust,  
11  
12 129 including those relating to patient demographics, length of stay, and bed occupancy.  
13  
14

15 130 The second data source was pseudonymised national admitted patient care Hospital Episode  
16  
17 131 Statistics (HES-APC) between 1<sup>st</sup> January 2016 and 31<sup>st</sup> December 2019. HES-APC is a routinely  
18  
19 132 collected dataset that records all episodes of admitted (day case or inpatient) care provided to  
20  
21 133 patients at NHS hospitals in England and to NHS-funded patients treated in independent hospitals.<sup>16</sup>  
22  
23 134 Each episode represents a period of care under one consultant team. Up to 20 diagnoses and 24  
24  
25 135 clinical procedures are recorded per episode using ICD-10 codes and OPCS-4 codes, respectively. HES  
26  
27 136 also includes the Lower Super Output Area (LSOA; an area of around 1,500 people) of residence for  
28  
29 137 each patient, which can be linked to CCG of residence. This data source was used to estimate  
30  
31 138 elective capacity overall at the Trust, and the ratio of public/private provision of hip and knee  
32  
33 139 replacements in the catchment area for the Trust (see details below), which could not be gathered  
34  
35 140 from the extract provided from the Trust EMR.  
36  
37  
38  
39  
40

#### 41 **Hospital admissions for hip and knee replacements**

42  
43 142 Hospital admissions for elective hip and knee replacements were identified by entries with a primary  
44  
45 143 procedure code representing primary hip or knee replacement (Supplementary Table T1) using the  
46  
47 144 Trust EMR. We used this information to explore summary characteristics of the hospital admissions  
48  
49 145 over time (overall counts of admissions, average age, proportion of women, proportion with 2+  
50  
51 146 comorbidities, proportion in the two most deprived quintiles) stratified by primary hip or knee  
52  
53 147 replacements.  
54  
55  
56

#### 57 **Length of stay and bed occupancy**

58  
59  
60

1  
2  
3 149 We used the average number of overnight stays in hospital (days) for length of stay, trimmed at 30  
4  
5 150 days to exclude a small number of outliers (n=32, 0.6%). Trimming allowed us to model averages  
6  
7 151 assuming a roughly normal distribution which we felt was more easily interpretable. Bed occupancy  
8  
9 152 was the total number of beds used overnight for hip and knee replacement patients.  
10  
11  
12

### 13 153 **Comorbidity of Admissions**

14  
15 154 For each admission, we counted the number of conditions from the Charlson comorbidity index<sup>17</sup>  
16  
17 155 recorded in the diagnosis fields. The Charlson index provides a summary of weighted scores relating  
18  
19 156 to different comorbidities and has been shown to be associated with mortality. Admissions were  
20  
21 157 categorised into those with zero, one, and two or more Charlson comorbidities.  
22  
23  
24

### 25 158 **Ratio of Elective to Emergency Admissions**

26  
27 159 To estimate the ratio of elective to emergency admissions for all purposes at the Trust (as a proxy for  
28  
29 160 elective capacity), we extracted all hospital admissions from HES-APC with the Trust as a provider  
30  
31 161 and categorised them into elective and emergency (admission method beginning with '1' or '2',  
32  
33 162 respectively).  
34  
35  
36

### 37 163 **Ratio of Public to Private Provision of Hip and Knee Replacements**

38  
39 164 To estimate the ratio of public to private provision of NHS-funded elective hip and knee surgery for  
40  
41 165 the Trust catchment area, we extracted all hospital admissions for primary hip and knee  
42  
43 166 replacements (codes in Supplementary Table T1) for residents of the major local clinical  
44  
45 167 commissioning groups (CCGs) from HES-APC (using 2021 CCG boundaries after local CCGs had  
46  
47 168 merged into one CCG<sup>18</sup>), and categorised providers into public and private (provider code beginning  
48  
49 169 with 'R' or 'N', respectively).  
50  
51  
52

### 53 170 **Statistical Analysis**

54  
55 171 For each of our outcomes, we conducted interrupted time series (ITS) analyses using segmented  
56  
57 172 regression models comparing hospital admissions in the 'before' period (January 2016 to November  
58  
59  
60

1  
2  
3 173 2017) to the 'after' period (February 2018 to December 2019). We excluded the winter 2017 period  
4  
5 174 when admissions were very low (December 2017 and January 2018). The ITS analyses explored the  
6  
7 175 trend before winter 2017, and how this trend changed after winter 2017<sup>12 19</sup>, allowing for an  
8  
9 176 immediate step change in February 2018 and a change in slope afterwards. We explored seasonality  
10  
11 177 in the data by including indicator variables for spring, summer, and autumn<sup>19</sup> compared to winter as  
12  
13 178 a baseline, and adjusted for serial autocorrelation using Newey-West standard errors with a maximum  
14  
15 179 lag of two<sup>20-22</sup>. For count or proportion outcomes (number of admissions, proportion women,  
16  
17 180 proportion with 2+ comorbidities, proportion in top two deprivation quintiles, bed occupancy)  
18  
19 181 segmented Poisson regression models were fit to the data, whilst for averages/ratios (average age,  
20  
21 182 average length of stay, ratio of elective to emergency admissions, ratio of public to private provision)  
22  
23 183 segmented linear regression models were fit, using the 'glm' command in Stata. Sensitivity analyses  
24  
25 184 were conducted adjusting the maximum lag for serial autocorrelation to zero and five; this would not  
26  
27 185 affect point estimates but could alter standard errors, confidence intervals, and p-values.

28  
29  
30 186 All statistical analyses were conducted using Stata/MP version 16.1. Smoothed trends were fit to the  
31  
32 187 data on all plots using the 'lowess' command with bandwidth 0.3. Stata code is available at:  
33  
34 188 [https://github.com/jonestim2002/hdr\\_uk\\_hospital\\_efficiency](https://github.com/jonestim2002/hdr_uk_hospital_efficiency)

### 189 **Patient and public involvement**

190 Initial research ideas for the grant application of which this work is part were presented to the public  
191 in a workshop and suggestions and comments were incorporated in the protocol. Feedback during  
192 the workshop was positive, with participants agreeing with the research objectives and the  
193 identified need.

194

## 195 **RESULTS**

196 *Descriptive information and demographics*

1  
2  
3 197 A total of 2,623 patients had a hip replacement and 2,674 had a knee replacement at the Trust in the  
4  
5 198 4 years between 2016 and 2019. The mean age of patients was 67 years and 60% were women for  
6  
7 199 both types of operations.  
8  
9

#### 10 200 *Trends in hip and knee elective hospital admissions over time*

11  
12  
13 201 The overall numbers of elective primary hip and knee replacement operations gradually declined  
14  
15 202 over the study period from 63 hip and 65 knee replacements per month in 2016 to 49 hip and 51  
16  
17 203 knee replacements per month in 2019. Whilst there was a drop off in winter 2017, after elective  
18  
19 204 surgery was re-started hip replacements resumed at similar numbers and continued to decline along  
20  
21 205 a similar trajectory. Numbers of knee replacements dropped by 16% after winter 2017 (RR=0.843,  
22  
23 206 95% CI: 0.728 to 0.976, p=0.022), and the slope appeared to level off, although there was little  
24  
25 207 evidence for this in the regression model (RR=1.005, 95% CI: 0.996 to 1.014, p=0.256); see Figure 1  
26  
27 208 and Supplementary Table T2. Hip and knee operations were clearly seasonal, with higher admissions  
28  
29 209 in non-winter months compared to winter; 21% higher in the highest season (summer) for hips  
30  
31 210 (RR=1.207, 95% CI: 1.094 to 1.332, p<0.001), and 31% higher in the highest season (spring) for knee  
32  
33 211 replacements (RR=1.308, 95% CI: 1.157 to 1.479, p<0.001), excluding winter 2017.  
34  
35  
36  
37  
38  
39  
40  
41  
42

#### 43 213 *Age on Admission*

44 214 There was evidence of seasonality in average age on admission for hip admissions, where the mean  
45  
46 215 age of patients was 66 in winter compared to 68 in summer (+2.09; 95% CI: 0.81 to 3.37, p = 0.001),  
47  
48 216 suggesting that older patients might be more likely to receive surgery in the summer months. There  
49  
50 217 was a change in the trend in average age for knee replacements after winter 2017 (+0.21, 95% CI:  
51  
52 218 0.12 to 0.31, p < 0.001) towards treating older patients (+1.59 years of age per year); see Figure 2.  
53  
54  
55  
56

#### 57 220 *Proportion Women*

1  
2  
3 221 A higher proportion of hip replacements were performed on women in the summer (64%) compared  
4  
5 222 to winter (58%) months (RR=1.088, 95% CI: 1.001 to 1.183, p=0.048). There were no clear patterns  
6  
7 223 for knee replacements.  
8

9  
10 224

### 11 225 *Comorbidity of Admissions*

12  
13  
14 226 There was seasonality in the comorbidity of people having hip replacements, with a higher  
15  
16 227 proportion of people having 2+ comorbidities in the summer (15.9%) compared to winter (12.3%)  
17  
18 228 months (RR=1.306, 95% CI: 1.096 to 1.557, p=0.003). There was also a step change up in the  
19  
20 229 proportion having hip replacements with 2+ comorbidities after winter 2017 (RR=1.411, 95% CI:  
21  
22 230 1.064 to 1.873, p=0.017), and an upward slope change for knee replacements (RR=1.042, 95% CI:  
23  
24 231 1.017 to 1.067, p=0.001); see Figure 3.  
25  
26  
27

28 232

### 29 233 *Deprivation*

30  
31  
32 234 There was a higher proportion of more deprived people (quintiles 4 and 5) having knee  
33  
34 235 replacements in the spring (37.6%) compared to the winter (30.2%) months (RR=1.224, 95% CI:  
35  
36 236 1.077 to 1.49, p=0.002). Additionally, there was evidence of a reducing proportion of the most  
37  
38 237 deprived people having knee replacements after winter 2017 (RR=0.986, 95% CI: 0.974 to 0.998,  
39  
40 238 p=0.021).  
41  
42

43 239

### 44 240 *Ratio of elective admissions to emergency admissions at the Trust*

45  
46  
47  
48 241 There was an overall downward trend in the ratio of elective to emergency admissions at the Trust,  
49  
50 242 from an average of 2.91 (SD: 0.17) electives for every emergency in 2016 to 2.16 (SD: 0.06) in 2019;  
51  
52 243 see Supplementary Figure F1. There was no indication of seasonality, but the ratio reduced after  
53  
54 244 winter 2017 (RR=0.725, 95% CI: 0.64 to 0.821, p<0.001), and started to decrease more rapidly  
55  
56 245 afterwards (RR=0.984, 95% CI: 0.974 to 0.995, p=0.003).  
57  
58  
59  
60

1  
2  
3 246  
4  
56 247 *Ratio of public to private provision of hip/knee elective surgery at the Trust*  
7

8  
9 248 The ratio of public to private provision was higher in the summer (1.56 for hips and 1.28 for knees)  
10  
11 249 compared to winter (1.22 and 0.99, respectively) months (hips RR=1.361, 95% CI 1.166 to 1.589,  
12  
13 250  $p<0.001$ ; knees RR=1.318, 95% CI: 1.035 to 1.678,  $p=0.025$ ). There was also evidence of a step  
14  
15 251 change downwards in public provision compared to private provision after winter 2017 for both  
16  
17 252 types of surgery, but particularly for hip replacements (hips RR=0.477, 95% CI: 0.29 to 0.782,  
18  
19 253  $p=0.003$ ; knees RR=0.621, 95% CI: 0.358 to 1.077,  $p=0.09$ ); see Figure 4.  
20  
21  
22

23 254  
24  
2526 255 *Bed Occupancy*  
27

28  
29 256 Bed occupancy for hip and knee replacements at the Trust was very seasonal, with lower occupancy  
30  
31 257 in the winter months compared to all other seasons; e.g. summer bed occupancy was 324 beds for  
32  
33 258 hips and 291 beds for knees on average compared to winter bed occupancy of 225 beds for hips and  
34  
35 259 199 beds for knees on average. In both cases bed occupancy has reduced over time, although there  
36  
37 260 wasn't evidence of this in the regression model for hip replacements, and there was a step change  
38  
39 261 downwards (RR=0.834, 95% CI: 0.704 to 0.989,  $p=0.037$ ) for knee surgery after winter 2017; see  
40  
41 262 Figure 5.  
42  
43  
44

45 263  
46  
4748 264 *Length of Stay*  
49

50  
51 265 The average length of hospital stay was 5.5 days (SD: 5.9 days) for hip replacements and 5.2 days  
52  
53 266 (SD: 5.0 days) for knee replacements in 2016, compared to 5.1 days (SD: 4.1 days) and 4.3 days (SD:  
54  
55 267 3.4 days) respectively in 2019 (see Supplementary Figure F2). Length of stay was longer in spring  
56  
57 268 than winter for hip replacements (0.502 days, 95% CI: 0.214 to 0.79,  $p=0.001$ ), and longer in spring  
58  
59  
60

269 (0.422, 95% CI: 0.073 to 0.771, p=0.018) and autumn (0.396, 95% CI: 0.015 to 0.777, p=0.042)

270 compared to winter for knee replacements.

271

## 272 **DISCUSSION**

### 273 *Principle findings*

274 The temporary cancellation of elective services during winter 2017 does appear to have had some  
275 impact on service provision at the Trust after that time. There was an immediate and sustained  
276 reduction in the number of knee replacements being done at the Trust and this was also reflected in  
277 the drop in bed occupancy for knee surgery. The average age for knee replacement and comorbidity  
278 of hip and knee surgery patients increased after winter 2017, whilst the proportion of more deprived  
279 people having knee replacements decreased, and the ratio of public to private provision of hip and  
280 knee replacements in the local area dropped after winter 2017. This suggests an NHS-funded  
281 outsourcing of less comorbid hip and knee replacement surgery to independent providers, and  
282 therefore on average the patients being treated at the Trust became older and more comorbid.  
283 There was a general decrease in capacity for elective surgery at the Trust (ratio of elective to  
284 emergency admissions), mostly driven by increasing non-elective admissions even before the COVID-  
285 19 pandemic. The winter 2017 cancellation may have been just one symptom of this overall pressure  
286 on elective surgery that underlies some of the longer-term changes in provision.

287 There was also some seasonality in service provision. It is no surprise that elective admissions and  
288 bed occupancy are lower in winter when the hospital requires capacity for an increase in unplanned  
289 admissions. There were also indications that people being admitted in winter were younger, less  
290 comorbid, and less deprived (particularly for knee surgery). Length of stay for hip and knee  
291 replacements was lower in winter compared to spring. This suggests the admission of younger, less

1  
2  
3 292 comorbid patients during the winter months given the reduced elective capacity and delaying  
4  
5 293 surgery for more comorbid patients to when capacity is higher in the following months.  
6  
7

8  
9 294 *Strengths and limitations*

10  
11 295 Trends analyses such as these, using data obtained from the EHR of a local hospital NHS Trust, are  
12  
13 296 informative for clinicians and service managers in monitoring changes in planning and delivery of  
14  
15 297 elective surgery, and could be regularly updated in near real time for monitoring. This concept might  
16  
17 298 be informative for other commissioning groups / Trusts to adopt for monitoring of their own elective  
18  
19 299 surgery and capacity. We report the experience of just one trust that is one of the larger elective  
20  
21 300 orthopaedic centres, and hence the findings may not be generalisable to or reflect the experience of  
22  
23 301 other trusts. We should be aware that some results may reflect chance findings due to multiple  
24  
25 302 testing and type 1 error. The trends in the data as plotted do not change substantially in sensitivity  
26  
27 303 analyses accounting for different autocorrelation lags (Supplementary Tables T3-T4). The catchment  
28  
29 304 area of the Trust is not exactly the same as the major local CCG and is difficult to define exactly.  
30  
31 305 However, 89.4% of admissions at the Trust were for residents of the local CCG and we felt this was a  
32  
33 306 reasonable approximation to estimate the ratio of public to private provision in the Trust catchment  
34  
35 307 area. Our analyses only include NHS-funded surgery and not privately-funded, privately-provided  
36  
37 308 surgery.  
38  
39  
40  
41  
42

43 309 *Comparison to other studies*

44  
45  
46 310 A previous study<sup>23</sup> using data for England from Hospital Episode Statistics found increasing private  
47  
48 311 provision of elective hip arthroplasties nationally from 2007/8 to 2012/13, particularly for less  
49  
50 312 deprived people, which echoes our findings. More recent news stories have suggested that 20% of  
51  
52 313 NHS-funded hip replacements and 29% of NHS-funded knee replacements were carried out by  
53  
54 314 independent providers in 2016/17<sup>24</sup>, and that independently-provided hip and knee replacement  
55  
56 315 surgery (privately or NHS-funded) has now overtaken NHS provision.<sup>25</sup> A UK-wide study<sup>6</sup> using  
57  
58  
59  
60



1  
2  
3 316 primary care data (CPRD) linked to hospital admissions found similar effects of patient  
4  
5 317 characteristics (age, sex, comorbidity, and deprivation) on length of stay for primary hip and knee  
6  
7 318 replacements, although they did not explore seasonality. A recent qualitative study<sup>26</sup> highlighted the  
8  
9 319 negative financial and emotional impact of winter elective cancellations on patients and their  
10  
11 320 families and recommended better advanced planning of elective operations to reduce these  
12  
13  
14 321 impacts.

16  
17 322 *Implications for clinicians and policy makers*

18  
19  
20 323 Outsourcing of less complex hip and knee replacements to take advantage of spare capacity in non-  
21  
22 324 NHS hospitals may be a good strategy to reduce waiting times and waiting lists for surgery and get  
23  
24 325 the best results for patients given the evident capacity limitations. However, this would leave the  
25  
26 326 NHS Trust to cope with more complex cases and has training implications because trainee surgeons  
27  
28 327 are usually trained by first undertaking less-complex cases on healthier patients. There are also  
29  
30 328 potential equity implications, if less complex cases have the option of surgery with shorter waiting  
31  
32 329 times at independent providers, whilst more complex (and potentially more deprived) cases do not.  
33  
34 330 We would need to consider the acceptability of this outsourcing to patients and practitioners.

35  
36  
37  
38  
39 331 There is an indication that some selection of patients for elective surgery depending on available  
40  
41 332 capacity already takes place at the Trust. It is possible that this could become a more explicit  
42  
43 333 strategy, based on evidence, to optimise the use of limited capacity in hospitals at different times of  
44  
45 334 the year. However, this could mean that people placed earlier on the waiting list for surgery might  
46  
47 335 get their surgery later due to such scheduling strategies, so acceptability to patients would need to  
48  
49 336 be explored. We need to understand how the scheduling and possible outsourcing of elective  
50  
51 337 surgery for different types of patients, depending on capacity, may impact on throughput of  
52  
53 338 patients, waiting times, waiting lists, outcomes of surgery, costs, and equity of access to surgery.  
54  
55 339 Inevitably outsourcing simpler patients to the independent sector will leave more complex patients  
56  
57 340 being treated by NHS Trusts, which could have a detrimental impact on their service. An appropriate  
58  
59  
60

1  
2  
3 341 balance would need to be achieved to maximise the benefits for patients, and research is needed to  
4  
5 342 understand what that balance is. Additionally, we need to understand whether this type of  
6  
7 343 scheduling and outsourcing is acceptable to people waiting for hip and knee surgery as well as  
8  
9 344 clinicians. These issues of optimising limited elective resources are in even sharper focus due to the  
10  
11 345 backlog in waiting lists caused by the COVID-19 pandemic.  
12  
13  
14

#### 15 346 *Unanswered questions and future research*

17  
18 347 We need to understand how the scheduling and possible outsourcing of elective surgery for  
19  
20 348 different types of patients, depending on capacity, may impact on throughput of patients, waiting  
21  
22 349 times, waiting lists, outcomes of surgery, costs, and equity of access to surgery. Inevitably  
23  
24 350 outsourcing simpler patients to the independent sector will leave more complex patients being  
25  
26 351 treated by NHS Trusts, which could have a detrimental impact on their service. An appropriate  
27  
28 352 balance would need to be achieved to maximise the benefits for patients, and research is needed to  
29  
30 353 understand what that balance is. Additionally, we need to understand whether this type of  
31  
32 354 scheduling and outsourcing is acceptable to people waiting for hip and knee surgery as well as  
33  
34 355 clinicians.  
35  
36  
37  
38

#### 39 356 *Conclusions*

40  
41  
42 357 Declining elective capacity and seasonality has a marked effect on the provision of joint  
43  
44 358 replacement, despite efficiency improvements in hospital treatment. The Trust has outsourced less  
45  
46 359 complex patients to independent providers, and/or treated them during winter when capacity is  
47  
48 360 most limited. There is a need to explore whether these are strategies that could be used explicitly to  
49  
50 361 maximise the use of limited elective capacity, provide benefit to patients, and value for money for  
51  
52 362 taxpayers.  
53  
54  
55

56 363

#### 59 364 **Author Contributions**

1  
2  
3 365 This publication is the work of the authors, who serve as guarantors for the contents of this paper. TJ  
4  
5 366 contributed to study design, data cleaning, data analysis, interpretation of results and writing the  
6  
7 367 manuscript. MTR contributed to study conceptualisation, supervision, interpretation of results and  
8  
9 368 reviewing the manuscript. TK contributed to data curation, supervision, interpretation of results and  
10  
11 369 reviewing the manuscript. AE contributed to data curation, interpretation of results and reviewing  
12  
13 370 the manuscript. CP and EE contributed to interpretation of results and reviewing the manuscript. AB  
14  
15 371 contributed to study conceptualisation, supervision, interpretation of results and reviewing the  
16  
17 372 manuscript. AJ contributed to study conceptualisation and design, supervision, and writing the  
18  
19 373 manuscript. TJ had full access to the data in the study and takes responsibility for the integrity of the  
20  
21 374 data and the accuracy of the data analysis.  
22  
23  
24  
25  
26 375  
27  
28

### 29 376 **Acknowledgements**

30  
31  
32 377 The study reported here would not have been possible without information provided by the NHS  
33  
34 378 Trust, and the use of their hospital admissions data via the NIHR ARC West Partnership Agreement.  
35  
36  
37 379

### 38 39 40 380 **Funding**

41  
42  
43 381 This research was funded by Health Data Research UK (HDR UK) Better Care South-West Partnership.  
44  
45 382 EE, TJ, and MTR's time was supported by the National Institute for Health Research Applied Research  
46  
47 383 Collaboration West (NIHR ARC West). The views expressed in this article are those of the author(s)  
48  
49 384 and not necessarily those of the NHS, the NIHR, the Department of Health and Social Care or HDR  
50  
51 385 UK.  
52  
53  
54  
55 386

### 56 57 58 387 **Ethical Approval**

59  
60

1  
2  
3 388 We were provided with pseudonymised hospital admissions data from the NHS Trust under the NIHR  
4  
5 389 ARC West Partnership Agreement. The project received ethical approval from the University of  
6  
7 390 Bristol Faculty of Health Sciences ethical review board on 3<sup>rd</sup> November 2020 (ref# 109024).  
8  
9

10 391 We were provided with routinely-collected Hospital Episode Statistics data under licence from NHS  
11  
12 392 Digital (DARS-NIC-17875-X7K1V). The licence allows us to use the information under Section 261 of  
13  
14 393 the Health and Social Care Act 2012, 2(b)(ii): “after taking into account the public interest as well as  
15  
16 394 the interests of the relevant person, considers that it is appropriate for the information to be  
17  
18 395 disseminated”.  
19  
20

21  
22 396  
23  
24

#### 25 397 **Data Sharing**

26  
27  
28 398 The data from the NHS Trust was obtained under the NIHR ARC West Partnership Agreement. The  
29  
30 399 agreement precludes us from sharing the raw data but it can be published and shared once  
31  
32 400 aggregated to a non-identifiable level.  
33  
34

35 401 The data from Hospital Episode Statistics (HES) was obtained under licence (DARS-NIC-17875-X7K1V)  
36  
37 402 from NHS Digital (previously the Health and Social Care Information Centre); *Copyright © 2022, re-*  
38  
39 403 *used with the permission of The Health & Social Care Information Centre. All rights reserved.* The  
40  
41 404 data are provided by patients and collected by the NHS as part of their care and support. HES data  
42  
43 405 can be accessed via NHS Digital: <https://digital.nhs.uk/services/data-access-request-service-dars>  
44  
45  
46  
47  
48  
49

#### 50 407 **Transparency**

51  
52  
53 408 The manuscript’s guarantor (TJ) affirms that the manuscript is an honest, accurate, and transparent  
54  
55 409 account of the study being reported; that no important aspects of the study have been omitted; and  
56  
57 410 that any discrepancies from the study as originally planned have been explained.  
58  
59  
60

411

412 **Competing Interests**

413 All authors have completed the ICMJE uniform disclosure form at [www.icmje.org/coi\\_disclosure.pdf](http://www.icmje.org/coi_disclosure.pdf)  
 414 and declare: TJ, EE, and TR had financial support from NIHR ARC West for the submitted work; AJ has  
 415 had financial support in the previous three years through institutional grants from NIHR, HDR UK,  
 416 Versus Arthritis, Healthcare Quality Improvement Partnership (HQIP), Royal College of Physicians  
 417 (RCP), and Health Foundation, had unpaid committee or leadership roles relating to musculoskeletal  
 418 conditions for NIHR, Nuffield Foundation, Warwick CTU, and Versus Arthritis, and a paid expert panel  
 419 role for Nuffield Foundation Oliver Bird Fund; no other financial relationships with any organisations  
 420 that might have an interest in the submitted work in the previous three years; no other relationships  
 421 or activities that could appear to have influenced the submitted work.

422

423

424 **REFERENCES**

425

- 426 1. Carr AJ, Robertsson O, Graves S, et al. Knee replacement. *Lancet* 2012;379(9823):1331-40. doi:  
 427 10.1016/S0140-6736(11)60752-6
- 428 2. Pivec R, Johnson AJ, Mears SC, et al. Hip arthroplasty. *Lancet* 2012;380(9855):1768-77. doi:  
 429 10.1016/S0140-6736(12)60607-2
- 430 3. Price AJ, Alvand A, Troelsen A, et al. Hip and knee replacement 2 Knee replacement. *Lancet*  
 431 2018;392(10158):1672-82. doi: Doi 10.1016/S0140-6736(18)32344-4
- 432 4. Ferguson RJ, Palmer AJ, Taylor A, et al. Hip replacement. *Lancet* 2018;392(10158):1662-71. doi:  
 433 10.1016/S0140-6736(18)31777-X [published Online First: 2018/11/30]
- 434 5. Culliford DJ, Maskell J, Beard DJ, et al. Temporal trends in hip and knee replacement in the United  
 435 Kingdom 1991 TO 2006. *J Bone Joint Surg Br* 2010;92b(1):130-35. doi: 10.1302/0301-  
 436 620x.92b1.22654
- 437 6. Burn E, Edwards CJ, Murray DW, et al. Trends and determinants of length of stay and hospital  
 438 reimbursement following knee and hip replacement: evidence from linked primary care and  
 439 NHS hospital records from 1997 to 2014. *Bmj Open* 2018;8(1) doi: 10.1136/bmjopen-2017-  
 440 019146
- 441 7. Kehlet H. Fast-track hip and knee arthroplasty. *Lancet* 2013;381(9878):1600-02. doi: Doi  
 442 10.1016/S0140-6736(13)61003-X
- 443 8. Briggs T. A national review of adult elective orthopaedic services in England 2015. Available from:  
 444 [https://gettingitrightfirsttime.co.uk/wp-content/uploads/2017/06/GIRFT-National-Report-](https://gettingitrightfirsttime.co.uk/wp-content/uploads/2017/06/GIRFT-National-Report-Mar15-Web.pdf)  
 445 [Mar15-Web.pdf](https://gettingitrightfirsttime.co.uk/wp-content/uploads/2017/06/GIRFT-National-Report-Mar15-Web.pdf).
- 446 9. Ward D, Wenzel L. A new trend in elective hip surgery 2019. Available from:  
 447 <https://www.kingsfund.org.uk/blog/2019/06/new-trend-elective-hip-surgery>.
- 448 10. Fisher E, Merry L. Winter 2017/18: the worst ever for the NHS? 2018. Available from:  
 449 <https://www.nuffieldtrust.org.uk/news-item/winter-2017-18-the-worst-ever-for-the-nhs>.

- 1  
2  
3 450 11. BMJ. Covid-19: "Life on hold" for NHS patients needing musculoskeletal care 2021. Available  
4 451 from: <https://doi.org/10.1136/bmj.n1616>.
- 5 452 12. Bernal JL, Cummins S, Gasparrini A. Interrupted time series regression for the evaluation of  
6 453 public health interventions: a tutorial. *Int J Epidemiol* 2017;46(1):348-55. doi:  
7 454 10.1093/ije/dyw098
- 8 455 13. Kontopantelis E, Doran T, Springate DA, et al. Regression based quasi-experimental approach  
9 456 when randomisation is not an option: interrupted time series analysis. *Bmj-Brit Med J*  
10 457 2015;350 doi: 10.1136/bmj.h2750
- 11 458 14. Leatherdale ST. Natural experiment methodology for research: a review of how different  
12 459 methods can support real-world research. *Int J Soc Res Method* 2019;22(1):19-35. doi:  
13 460 10.1080/13645579.2018.1488449
- 14 461 15. Benchimol EI, Smeeth L, Guttman A, et al. The REporting of studies Conducted using  
15 462 Observational Routinely-collected health Data (RECORD) Statement. *Plos Med* 2015;12(10)  
16 463 doi: 10.1371/journal.pmed.1001885
- 17 464 16. Herbert A, Wijlaars L, Zylbersztejn A, et al. Data Resource Profile: Hospital Episode Statistics  
18 465 Admitted Patient Care (HES APC). *Int J Epidemiol* 2017;46(4):1093-+. doi: 10.1093/ije/dyx015
- 19 466 17. Quan H, Sundararajan V, Halfon P, et al. Coding algorithms for defining comorbidities in ICD-9-  
20 467 CM and ICD-10 administrative data. *Med Care* 2005;43(11):1130-9. doi:  
21 468 10.1097/01.mlr.0000182534.19832.83 [published Online First: 2005/10/15]
- 22 469 18. Office for National Statistics. LSOA (2011) to Clinical Commissioning Groups to Sustainability and  
23 470 Transformation Partnerships (April 2021) Lookup in England 2021. Available from:  
24 471 [https://geoportal.statistics.gov.uk/datasets/ons::lsoa-2011-to-clinical-commissioning-](https://geoportal.statistics.gov.uk/datasets/ons::lsoa-2011-to-clinical-commissioning-groups-to-sustainability-and-transformation-partnerships-april-2021-lookup-in-england/explore)  
25 472 [groups-to-sustainability-and-transformation-partnerships-april-2021-lookup-in-](https://geoportal.statistics.gov.uk/datasets/ons::lsoa-2011-to-clinical-commissioning-groups-to-sustainability-and-transformation-partnerships-april-2021-lookup-in-england/explore)  
26 473 [england/explore](https://geoportal.statistics.gov.uk/datasets/ons::lsoa-2011-to-clinical-commissioning-groups-to-sustainability-and-transformation-partnerships-april-2021-lookup-in-england/explore).
- 27 474 19. Bhaskaran K, Gasparrini A, Hajat S, et al. Time series regression studies in environmental  
28 475 epidemiology. *Int J Epidemiol* 2013;42(4):1187-95. doi: 10.1093/ije/dyt092
- 29 476 20. Bottomley C, Scott JAG, Isham V. Analysing Interrupted Time Series with a Control. *Epidemiologic*  
30 477 *Methods* 2019;8(1) doi: 10.1515/em-2018-0010
- 31 478 21. Linden A. Combining synthetic controls and interrupted time series analysis to improve causal  
32 479 inference in program evaluation. *J Eval Clin Pract* 2018;24(2):447-53. doi: 10.1111/jep.12882
- 33 480 22. Dorward J, Khubone T, Gate K, et al. The impact of the COVID-19 lockdown on HIV care in 65  
34 481 South African primary care clinics: an interrupted time series analysis. *Lancet Hiv*  
35 482 2021;8(3):e158-e65. doi: 10.1016/S2352-3018(20)30359-3
- 36 483 23. Sutaria S, Kirkwood G, Pollock AM. An ecological study of NHS funded elective hip arthroplasties  
37 484 in England from 2003/04 to 2012/13. *J Roy Soc Med* 2019;112(7):292-303. doi:  
38 485 10.1177/0141076819851701
- 39 486 24. The Independent. NHS privatisation fears after figures show third of knee replacements done by  
40 487 private sector 2018. Available from: [https://www.independent.co.uk/news/uk/home-](https://www.independent.co.uk/news/uk/home-news/nhs-knee-hip-replacements-private-sector-a8549006.html)  
41 488 [news/nhs-knee-hip-replacements-private-sector-a8549006.html](https://www.independent.co.uk/news/uk/home-news/nhs-knee-hip-replacements-private-sector-a8549006.html).
- 42 489 25. Dench J. Private hospital overtakes NHS for hip and knee replacement 2021. Available from:  
43 490 [https://londonnewstime.com/private-hospital-overtakes-nhs-for-hip-and-knee-](https://londonnewstime.com/private-hospital-overtakes-nhs-for-hip-and-knee-replacement/479438/)  
44 491 [replacement/479438/](https://londonnewstime.com/private-hospital-overtakes-nhs-for-hip-and-knee-replacement/479438/).
- 45 492 26. Herrod PJJ, Adiamah A, Boyd-Carson H, et al. Winter cancellations of elective surgical procedures  
46 493 in the UK: a questionnaire survey of patients on the economic and psychological impact. *Bmj*  
47 494 *Open* 2019;9(9) doi: 10.1136/bmjopen-2018-028753

**FIGURE CAPTIONS**

Figure 1. Elective hip (left panel) and knee (right panel) replacement admissions at the Trust  
Note: grey area shows the winter 2017 cancellations and is excluded from the analysis

Figure 2. Average age on admission for hip (left panel) and knee (right panel) replacements at the Trust  
Note: grey area shows the winter 2017 cancellations and is excluded from the analysis

Figure 3. Proportion of people having hip (left panel) and knee (right panel) replacements with 2+ Charlson comorbidities recorded  
Note: grey area shows the winter 2017 cancellations and is excluded from the analysis

Figure 4. Ratio of public to private provision of elective hip (left panel) and knee (right panel) replacements for NHS patients in the Trust CCG  
Note: grey area shows the winter 2017 cancellations and is excluded from the analysis

Figure 5. Bed occupancy for hip (left panel) and knee (right panel) replacements at the Trust  
Note: grey area shows the winter 2017 cancellations and is excluded from the analysis

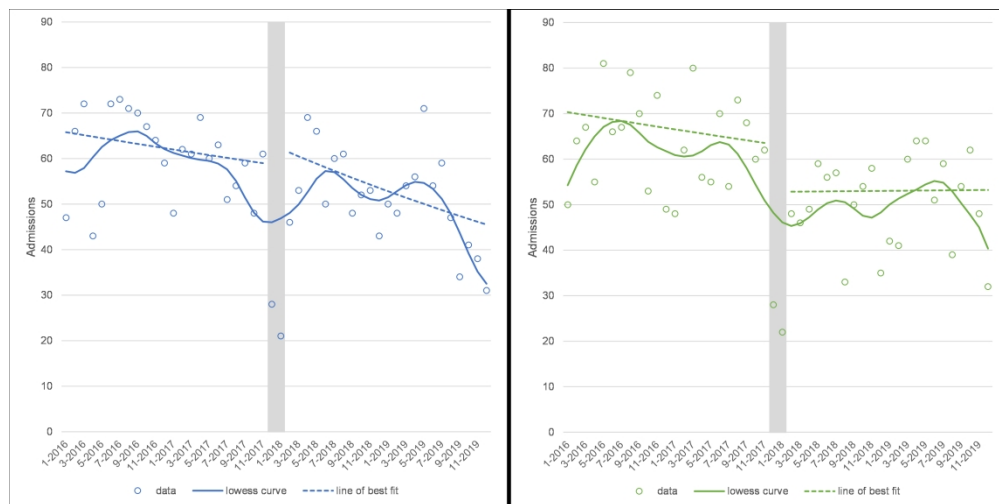

Figure 1. Elective hip (left panel) and knee (right panel) replacement admissions at the Trust  
 Note: grey area shows the winter 2017 cancellations and is excluded from the analysis

301x150mm (300 x 300 DPI)



1  
2  
3  
4  
5  
6  
7  
8  
9  
10  
11  
12  
13  
14  
15  
16  
17  
18  
19  
20  
21  
22  
23  
24  
25  
26  
27  
28  
29  
30  
31  
32  
33  
34  
35  
36  
37  
38  
39  
40  
41  
42  
43  
44  
45  
46  
47  
48  
49  
50  
51  
52  
53  
54  
55  
56  
57  
58  
59  
60

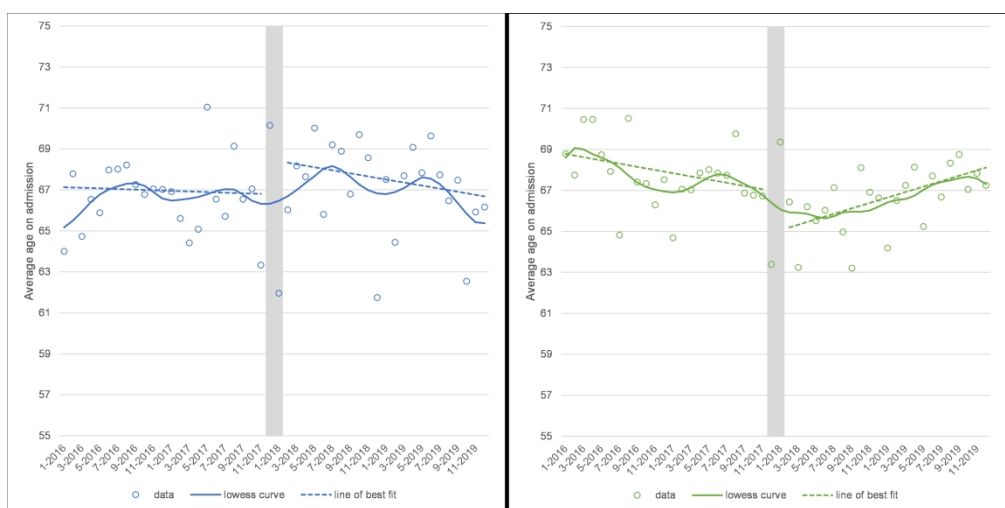

Figure 2. Average age on admission for hip (left panel) and knee (right panel) replacements at the Trust  
Note: grey area shows the winter 2017 cancellations and is excluded from the analysis

301x150mm (300 x 300 DPI)

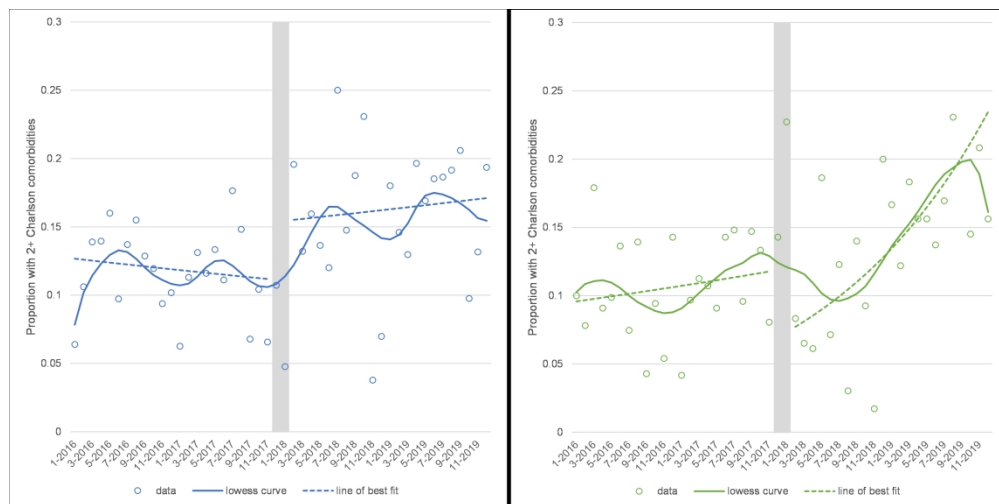

Figure 3. Proportion of people having hip (left panel) and knee (right panel) replacements with 2+ Charlson comorbidities recorded  
 Note: grey area shows the winter 2017 cancellations and is excluded from the analysis

301x150mm (300 x 300 DPI)

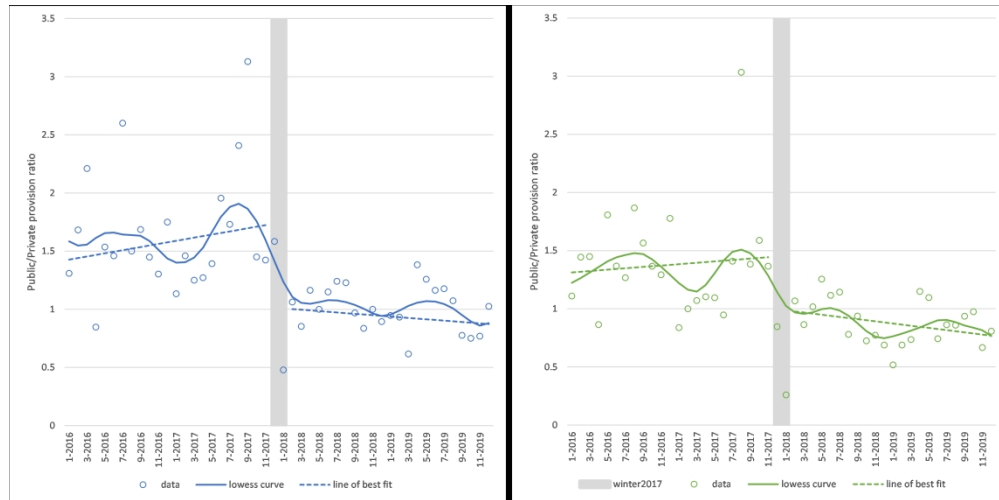

Figure 4. Ratio of public to private provision of elective hip (left panel) and knee (right panel) replacements for NHS patients in the Trust CCG  
 Note: grey area shows the winter 2017 cancellations and is excluded from the analysis

301x150mm (300 x 300 DPI)

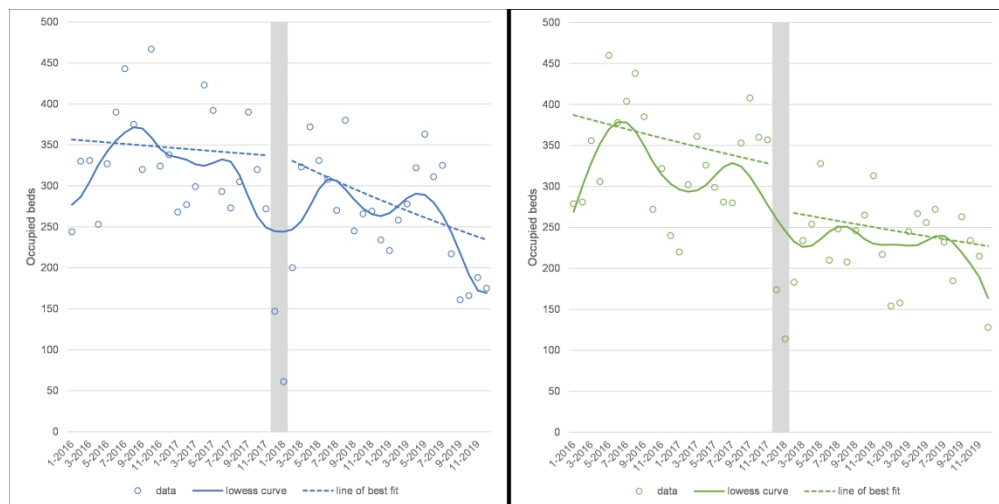

Figure 5. Bed occupancy for hip (left panel) and knee (right panel) replacements at the Trust  
 Note: grey area shows the winter 2017 cancellations and is excluded from the analysis

301x150mm (300 x 300 DPI)

**Supplementary Figure F1. Ratio of elective to emergency hospital admissions for any reason at the Trust**

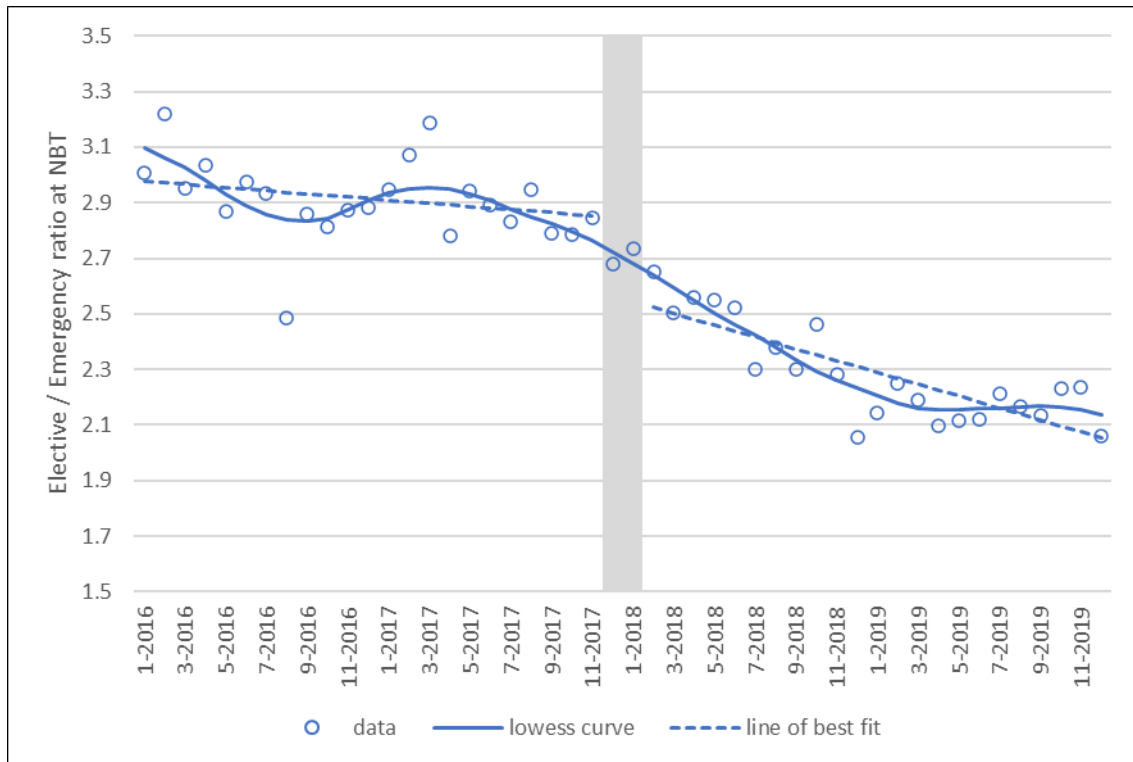

Note: grey area shows the winter 2017 cancellations and is excluded from the analysis

Review only

Supplementary Figure F2. Average length of stay for primary hip (left) and knee (right) replacement operations at NBT

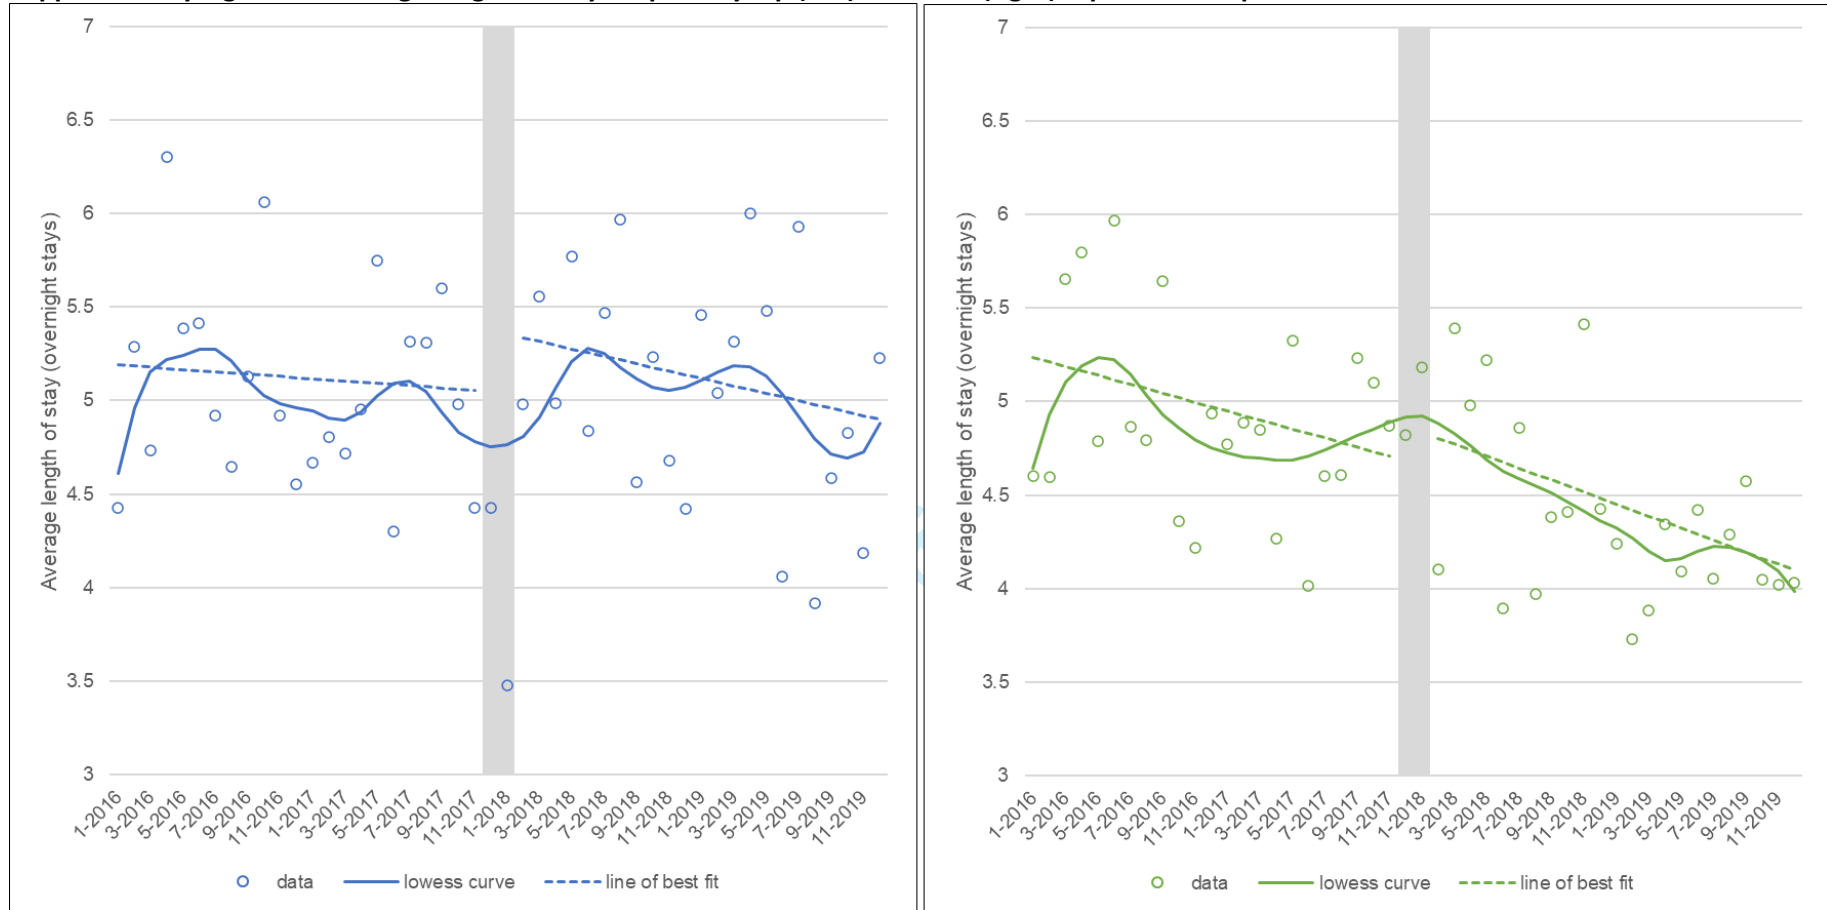

Note: grey area shows the winter 2017 cancellations and is excluded from the analysis

1  
2  
3  
4  
5  
6  
7  
8  
9  
10  
11  
12  
13  
14  
15  
16  
17  
18  
19  
20  
21  
22  
23  
24  
25  
26  
27  
28  
29  
30  
31  
32  
33  
34  
35  
36  
37  
38  
39  
40  
41  
42  
43  
44  
45  
46

For peer review only

**Supplementary Table T1. OPCS-4 codes used to identify primary hip and knee replacement operations**

| <b>Category</b>                      | <b>Code</b>                                                             | <b>Description</b>                                                               | <b>Notes</b> |
|--------------------------------------|-------------------------------------------------------------------------|----------------------------------------------------------------------------------|--------------|
| <i>Primary Total Hip Replacement</i> | W37.1                                                                   | Primary total prosthetic replacement of hip joint using cement                   |              |
|                                      | W37.8                                                                   | Other specified total prosthetic replacement of hip joint using cement           |              |
|                                      | W37.9                                                                   | Unspecified total prosthetic replacement of hip joint using cement               |              |
|                                      | W38.1                                                                   | Primary total prosthetic replacement of hip joint not using cement               |              |
|                                      | W38.8                                                                   | Other specified total prosthetic replacement of hip joint not using cement       |              |
|                                      | W38.9                                                                   | Unspecified total prosthetic replacement of hip joint not using cement           |              |
|                                      | W39.1                                                                   | Primary total prosthetic replacement of hip joint NEC                            |              |
|                                      | W39.8                                                                   | Other specified other total prosthetic replacement of hip joint                  |              |
|                                      | W39.9                                                                   | Unspecified other total prosthetic replacement of hip joint                      |              |
|                                      | W43.1                                                                   | Primary total prosthetic replacement of other joint using cement NEC             |              |
|                                      | W43.8                                                                   | Other specified total prosthetic replacement of other joint using cement NEC     |              |
|                                      | W43.9                                                                   | Unspecified total prosthetic replacement of other joint using cement NEC         |              |
|                                      | W44.1                                                                   | Primary total prosthetic replacement of other joint not using cement NEC         |              |
|                                      | W44.8                                                                   | Other specified total prosthetic replacement of other joint not using cement NEC |              |
|                                      | W44.9                                                                   | Unspecified total prosthetic replacement of other joint not using cement NEC     |              |
|                                      | W45.1                                                                   | Other primary total prosthetic replacement of other joint NEC                    |              |
| W45.8                                | Other specified total prosthetic replacement of other joint NEC         |                                                                                  |              |
| W45.9                                | Unspecified total prosthetic replacement of other joint NEC             |                                                                                  |              |
| W52.1                                | Primary prosthetic replacement of articulation of bone using cement NEC |                                                                                  |              |



- 1  
2  
3 W52.8 Other specified prosthetic replacement of articulation of bone using  
4 cement NEC  
5  
6 W52.9 Unspecified prosthetic replacement of articulation of bone using  
7 cement NEC  
8  
9 W53.1 Primary prosthetic replacement of articulation of bone not using  
10 cement NEC  
11  
12 W53.8 Other specified prosthetic replacement of articulation of bone not  
13 using cement NEC  
14  
15 W53.9 Unspecified prosthetic replacement of articulation of bone not using  
16 cement NEC  
17  
18 W54.1 Primary prosthetic replacement of articulation of bone NEC  
19  
20 W54.8 Other specified prosthetic replacement of articulation of bone NEC  
21  
22 W54.9 Unspecified prosthetic replacement of articulation of bone NEC  
23  
24 W93.1 Primary hybrid prosthetic replacement of hip joint using cemented  
25 acetabular component  
26  
27 W93.8 Other specified hybrid prosthetic replacement of hip joint using  
28 cemented acetabular component  
29  
30 W93.9 Unspecified hybrid prosthetic replacement of hip joint using cemented  
31 acetabular component  
32  
33 W94.1 Primary hybrid prosthetic replacement of hip joint using cemented  
34 femoral component  
35  
36 W94.8 Other specified hybrid prosthetic replacement of hip joint using  
37 cemented femoral component  
38  
39 W94.9 Unspecified hybrid prosthetic replacement of hip joint using cemented  
40 femoral component  
41  
42 W95.1 Primary hybrid prosthetic replacement of hip joint using cement NEC  
43  
44 W95.8 Other specified hybrid prosthetic replacement of hip joint using  
45 cement  
46  
W95.9 Unspecified hybrid prosthetic replacement of hip joint using cement
-

|    |                                     |       |                                                                                   |
|----|-------------------------------------|-------|-----------------------------------------------------------------------------------|
| 1  |                                     |       |                                                                                   |
| 2  |                                     |       |                                                                                   |
| 3  | <i>Primary Total Knee</i>           | W40.1 | Primary total prosthetic replacement of knee joint using cement                   |
| 4  | <i>Replacement</i>                  |       |                                                                                   |
| 5  |                                     |       |                                                                                   |
| 6  |                                     | W40.8 | Other specified total prosthetic replacement of knee joint using cement           |
| 7  |                                     |       |                                                                                   |
| 8  |                                     | W40.9 | Unspecified total prosthetic replacement of knee joint using cement               |
| 9  |                                     | W41.1 | Primary total prosthetic replacement of knee joint not using cement               |
| 10 |                                     |       |                                                                                   |
| 11 |                                     | W41.8 | Other specified total prosthetic replacement of knee joint not using cement       |
| 12 |                                     |       |                                                                                   |
| 13 |                                     | W41.9 | Unspecified total prosthetic replacement of knee joint not using cement           |
| 14 |                                     |       |                                                                                   |
| 15 |                                     | W42.1 | Primary total prosthetic replacement of knee joint NEC                            |
| 16 |                                     | W42.8 | Other specified other total prosthetic replacement of knee joint                  |
| 17 |                                     | W42.9 | Unspecified other total prosthetic replacement of knee joint                      |
| 18 |                                     | O18.1 | Primary hybrid prosthetic replacement of knee joint using cement                  |
| 19 |                                     | O18.8 | Other specified hybrid prosthetic replacement of knee joint using cement          |
| 20 |                                     |       |                                                                                   |
| 21 |                                     | O18.9 | Unspecified hybrid prosthetic replacement of knee joint using cement              |
| 22 |                                     |       |                                                                                   |
| 23 | <i>Resurfacing / Reconstruction</i> | W58.1 | Primary resurfacing arthroplasty of joint                                         |
| 24 |                                     |       | Require combination with site + combination codes to ID                           |
| 25 |                                     | W58.8 | Other specified reconstruction of joint                                           |
| 26 |                                     |       | Require combination with site + combination codes to ID                           |
| 27 |                                     |       |                                                                                   |
| 28 |                                     | W58.9 | Unspecified other reconstruction of joint                                         |
| 29 |                                     |       | Require combination with site + combination codes to ID                           |
| 30 |                                     |       |                                                                                   |
| 31 | <i>Primary unicondylar /</i>        | W52.1 | Primary prosthetic replacement of articulation of bone using cement               |
| 32 | <i>unicompartmental knee</i>        |       | Require combination with site + combination codes to ID                           |
| 33 | <i>operations</i>                   | W52.8 | Other specified prosthetic replacement of articulation of other bone using cement |
| 34 |                                     |       | Require combination with site + combination codes to ID                           |
| 35 |                                     |       |                                                                                   |
| 36 |                                     | W52.9 | Unspecified prosthetic replacement of articulation of other bone using cement     |
| 37 |                                     |       | Require combination with site + combination codes to ID                           |
| 38 |                                     |       |                                                                                   |
| 39 |                                     | W53.1 | Primary prosthetic replacement of articulation of bone not using cement NEC       |
| 40 |                                     |       | Require combination with site + combination codes to ID                           |
| 41 |                                     |       |                                                                                   |
| 42 |                                     |       |                                                                                   |
| 43 |                                     |       |                                                                                   |
| 44 |                                     |       |                                                                                   |
| 45 |                                     |       |                                                                                   |
| 46 |                                     |       |                                                                                   |

|    |       |                                                                        |                                 |
|----|-------|------------------------------------------------------------------------|---------------------------------|
| 1  |       |                                                                        |                                 |
| 2  |       |                                                                        |                                 |
| 3  | W53.9 | Unspecified prosthetic replacement of articulation of other bone not   | Require combination with site + |
| 4  |       | using cement                                                           | combination codes to ID         |
| 5  |       |                                                                        |                                 |
| 6  | W54.0 | Conversion from previous prosthetic replacement of articulation of     | Require combination with site + |
| 7  |       | bone NEC                                                               | combination codes to ID         |
| 8  | W54.1 | Primary prosthetic replacement of articulation of bone NEC             | Require combination with site + |
| 9  |       |                                                                        | combination codes to ID         |
| 10 |       |                                                                        |                                 |
| 11 | W54.8 | Other specified other prosthetic replacement of articulation of other  | Require combination with site + |
| 12 |       | bone                                                                   | combination codes to ID         |
| 13 | W54.9 | Unspecified other prosthetic replacement of articulation of other bone | Require combination with site + |
| 14 |       |                                                                        | combination codes to ID         |
| 15 | <hr/> |                                                                        |                                 |
| 16 |       |                                                                        |                                 |
| 17 |       |                                                                        |                                 |
| 18 |       |                                                                        |                                 |
| 19 |       |                                                                        |                                 |
| 20 |       |                                                                        |                                 |
| 21 |       |                                                                        |                                 |
| 22 |       |                                                                        |                                 |
| 23 |       |                                                                        |                                 |
| 24 |       |                                                                        |                                 |
| 25 |       |                                                                        |                                 |
| 26 |       |                                                                        |                                 |
| 27 |       |                                                                        |                                 |
| 28 |       |                                                                        |                                 |
| 29 |       |                                                                        |                                 |
| 30 |       |                                                                        |                                 |
| 31 |       |                                                                        |                                 |
| 32 |       |                                                                        |                                 |
| 33 |       |                                                                        |                                 |
| 34 |       |                                                                        |                                 |
| 35 |       |                                                                        |                                 |
| 36 |       |                                                                        |                                 |
| 37 |       |                                                                        |                                 |
| 38 |       |                                                                        |                                 |
| 39 |       |                                                                        |                                 |
| 40 |       |                                                                        |                                 |
| 41 |       |                                                                        |                                 |
| 42 |       |                                                                        |                                 |
| 43 |       |                                                                        |                                 |
| 44 |       |                                                                        |                                 |
| 45 |       |                                                                        |                                 |
| 46 |       |                                                                        |                                 |

**Supplementary Table T2. Interrupted time series model results with maximum auto-correlation lag 2**

|                            | pre-trend             |       | level change           |       | trend change         |       | spring               |       | summer               |       | autumn              |       |
|----------------------------|-----------------------|-------|------------------------|-------|----------------------|-------|----------------------|-------|----------------------|-------|---------------------|-------|
|                            | estimate (95% CI)     | p     | estimate (95% CI)      | p     | estimate (95% CI)    | p     | estimate (95% CI)    | p     | estimate (95% CI)    | p     | estimate (95% CI)   | p     |
| Hip Admissions             | 0.995 (0.986,1.004)   | 0.300 | 1.055 (0.912,1.221)    | 0.469 | 0.991 (0.977,1.006)  | 0.239 | 1.19 (1.034,1.37)    | 0.015 | 1.207 (1.094,1.332)  | 0.000 | 1.101 (0.982,1.234) | 0.099 |
| Hip Average Age            | -0.015 (-0.102,0.072) | 0.737 | 1.571 (-0.1,3.242)     | 0.065 | -0.06 (-0.175,0.055) | 0.307 | 1.52 (-0.07,3.111)   | 0.061 | 2.09 (0.811,3.368)   | 0.001 | 1.031 (-0.598,2.66) | 0.215 |
| Hip Prop Women             | 0.999 (0.995,1.003)   | 0.582 | 0.966 (0.861,1.083)    | 0.549 | 1.007 (0.999,1.016)  | 0.089 | 1.023 (0.941,1.111)  | 0.596 | 1.088 (1.001,1.183)  | 0.048 | 0.981 (0.888,1.083) | 0.700 |
| Hip Prop 2+ Charlson       | 0.994 (0.982,1.007)   | 0.380 | 1.411 (1.064,1.873)    | 0.017 | 1.01 (0.994,1.027)   | 0.220 | 1.195 (0.982,1.455)  | 0.075 | 1.306 (1.096,1.557)  | 0.003 | 1.003 (0.788,1.276) | 0.982 |
| Hip Prop High Deprivation  | 1.003 (0.993,1.013)   | 0.587 | 1.027 (0.869,1.214)    | 0.754 | 1.004 (0.986,1.022)  | 0.660 | 0.937 (0.815,1.076)  | 0.358 | 0.877 (0.752,1.022)  | 0.093 | 0.996 (0.84,1.18)   | 0.963 |
| Hip LoS                    | -0.006 (-0.034,0.021) | 0.660 | 0.312 (-0.193,0.818)   | 0.225 | -0.014 (-0.047,0.02) | 0.425 | 0.502 (0.214,0.79)   | 0.001 | 0.135 (-0.194,0.463) | 0.422 | 0.1 (-0.288,0.488)  | 0.613 |
| Hip Bed Occ                | 0.997 (0.987,1.008)   | 0.643 | 1 (0.844,1.186)        | 0.997 | 0.987 (0.97,1.005)   | 0.149 | 1.291 (1.11,1.501)   | 0.001 | 1.283 (1.125,1.463)  | 0.000 | 1.146 (0.988,1.328) | 0.071 |
| Hip Public Private         | 1.013 (0.985,1.041)   | 0.377 | 0.477 (0.29,0.782)     | 0.003 | 0.981 (0.951,1.011)  | 0.218 | 0.992 (0.809,1.217)  | 0.939 | 1.361 (1.166,1.589)  | 0.000 | 1.038 (0.847,1.273) | 0.718 |
| Knee Admissions            | 0.995 (0.99,1.001)    | 0.106 | 0.843 (0.728,0.976)    | 0.022 | 1.005 (0.996,1.014)  | 0.256 | 1.308 (1.157,1.479)  | 0.000 | 1.26 (1.138,1.396)   | 0.000 | 1.286 (1.164,1.42)  | 0.000 |
| Knee Average Age           | -0.078 (-0.157,0.001) | 0.054 | -1.632 (-2.988,-0.276) | 0.018 | 0.211 (0.117,0.305)  | 0.000 | 0.926 (-0.112,1.965) | 0.080 | 0.953 (-0.021,1.927) | 0.055 | 0.354 (-0.531,1.24) | 0.433 |
| Knee Prop Women            | 1.004 (0.998,1.01)    | 0.150 | 0.96 (0.85,1.084)      | 0.513 | 0.994 (0.986,1.003)  | 0.193 | 1.037 (0.963,1.117)  | 0.336 | 1.017 (0.924,1.118)  | 0.735 | 1.036 (0.958,1.12)  | 0.375 |
| Knee Prop 2+ Charlson      | 1.009 (0.993,1.026)   | 0.249 | 0.638 (0.455,0.894)    | 0.009 | 1.042 (1.017,1.067)  | 0.001 | 1.156 (0.911,1.467)  | 0.234 | 1.074 (0.849,1.359)  | 0.551 | 0.909 (0.628,1.315) | 0.612 |
| Knee Prop High Deprivation | 1.005 (0.997,1.013)   | 0.189 | 0.968 (0.786,1.191)    | 0.758 | 0.986 (0.974,0.998)  | 0.021 | 1.224 (1.077,1.39)   | 0.002 | 1.075 (0.942,1.227)  | 0.282 | 1.031 (0.902,1.178) | 0.656 |
| Knee LoS                   | -0.024 (-0.049,0.001) | 0.058 | 0.176 (-0.279,0.63)    | 0.449 | -0.008 (-0.036,0.02) | 0.566 | 0.422 (0.073,0.771)  | 0.018 | 0.15 (-0.166,0.467)  | 0.352 | 0.396 (0.015,0.777) | 0.042 |
| Knee Bed Occ               | 0.993 (0.984,1.002)   | 0.103 | 0.834 (0.704,0.989)    | 0.037 | 1 (0.989,1.011)      | 0.993 | 1.42 (1.297,1.556)   | 0.000 | 1.373 (1.218,1.547)  | 0.000 | 1.465 (1.312,1.635) | 0.000 |
| Knee Public Private        | 1.006 (0.98,1.032)    | 0.667 | 0.621 (0.358,1.077)    | 0.090 | 0.985 (0.961,1.01)   | 0.225 | 1.119 (0.915,1.369)  | 0.274 | 1.318 (1.035,1.678)  | 0.025 | 1.139 (0.931,1.394) | 0.205 |
| Elec Emerg Ratio           | 0.995 (0.987,1.002)   | 0.171 | 0.725 (0.64,0.821)     | 0.000 | 0.984 (0.974,0.995)  | 0.003 | 0.992 (0.887,1.109)  | 0.886 | 0.948 (0.833,1.08)   | 0.424 | 0.973 (0.86,1.1)    | 0.661 |

1  
2  
3  
4  
5  
6  
7  
8  
9  
10  
11  
12  
13  
14  
15  
16  
17  
18  
19  
20  
21  
22  
23  
24  
25  
26  
27  
28  
29  
30  
31  
32  
33  
34  
35  
36  
37  
38  
39  
40  
41  
42  
43  
44  
45  
46

Supplementary Table T3. Interrupted time series model results with maximum auto-correlation lag 0

|                            | pre-trend             |       | level change          |       | trend change          |       | spring               |       | summer               |       | autumn               |       |
|----------------------------|-----------------------|-------|-----------------------|-------|-----------------------|-------|----------------------|-------|----------------------|-------|----------------------|-------|
|                            | estimate (95% CI)     | p     | estimate (95% CI)     | p     | estimate (95% CI)     | p     | estimate (95% CI)    | p     | estimate (95% CI)    | p     | estimate (95% CI)    | p     |
| Hip Admissions             | 0.995 (0.985,1.005)   | 0.323 | 1.055 (0.902,1.235)   | 0.503 | 0.991 (0.978,1.005)   | 0.220 | 1.19 (1.036,1.367)   | 0.014 | 1.207 (1.088,1.339)  | 0.000 | 1.101 (0.983,1.234)  | 0.098 |
| Hip Average Age            | -0.015 (-0.134,0.104) | 0.806 | 1.571 (-0.863,4.004)  | 0.206 | -0.06 (-0.208,0.088)  | 0.427 | 1.52 (-0.079,3.119)  | 0.062 | 2.09 (0.685,3.494)   | 0.004 | 1.031 (-0.505,2.567) | 0.188 |
| Hip Prop Women             | 0.999 (0.993,1.004)   | 0.674 | 0.966 (0.826,1.13)    | 0.662 | 1.007 (0.997,1.017)   | 0.158 | 1.023 (0.937,1.116)  | 0.617 | 1.088 (0.995,1.189)  | 0.064 | 0.981 (0.878,1.096)  | 0.730 |
| Hip Prop 2+ Charlson       | 0.994 (0.98,1.009)    | 0.455 | 1.411 (0.969,2.055)   | 0.072 | 1.01 (0.989,1.031)    | 0.344 | 1.195 (0.971,1.471)  | 0.092 | 1.306 (1.043,1.637)  | 0.020 | 1.003 (0.734,1.37)   | 0.986 |
| Hip Prop High Deprivation  | 1.003 (0.991,1.014)   | 0.631 | 1.027 (0.846,1.247)   | 0.787 | 1.004 (0.983,1.025)   | 0.704 | 0.937 (0.819,1.072)  | 0.342 | 0.877 (0.746,1.03)   | 0.110 | 0.996 (0.831,1.193)  | 0.965 |
| Hip LoS                    | -0.006 (-0.038,0.026) | 0.704 | 0.312 (-0.262,0.887)  | 0.287 | -0.014 (-0.058,0.03)  | 0.542 | 0.502 (0.132,0.872)  | 0.008 | 0.135 (-0.292,0.562) | 0.537 | 0.1 (-0.287,0.487)   | 0.612 |
| Hip Bed Occ                | 0.997 (0.987,1.009)   | 0.653 | 1 (0.824,1.215)       | 0.997 | 0.987 (0.972,1.002)   | 0.097 | 1.291 (1.125,1.48)   | 0.000 | 1.283 (1.129,1.458)  | 0.000 | 1.146 (0.984,1.334)  | 0.080 |
| Hip Public Private         | 1.013 (0.985,1.041)   | 0.377 | 0.477 (0.29,0.782)    | 0.003 | 0.981 (0.951,1.011)   | 0.218 | 0.992 (0.809,1.217)  | 0.939 | 1.361 (1.166,1.589)  | 0.000 | 1.038 (0.847,1.273)  | 0.718 |
| Knee Admissions            | 0.995 (0.987,1.004)   | 0.274 | 0.843 (0.702,1.013)   | 0.068 | 1.005 (0.993,1.017)   | 0.422 | 1.308 (1.154,1.483)  | 0.000 | 1.26 (1.114,1.426)   | 0.000 | 1.286 (1.147,1.441)  | 0.000 |
| Knee Average Age           | -0.078 (-0.157,0.001) | 0.053 | -1.632 (-3.299,0.035) | 0.055 | 0.211 (0.102,0.32)    | 0.000 | 0.926 (-0.129,1.981) | 0.085 | 0.953 (-0.257,2.163) | 0.123 | 0.354 (-0.777,1.485) | 0.540 |
| Knee Prop Women            | 1.004 (0.998,1.011)   | 0.182 | 0.96 (0.84,1.097)     | 0.551 | 0.994 (0.986,1.003)   | 0.184 | 1.037 (0.939,1.146)  | 0.474 | 1.017 (0.908,1.138)  | 0.776 | 1.036 (0.928,1.157)  | 0.529 |
| Knee Prop 2+ Charlson      | 1.009 (0.988,1.031)   | 0.384 | 0.638 (0.392,1.037)   | 0.070 | 1.042 (1.008,1.077)   | 0.015 | 1.156 (0.891,1.501)  | 0.276 | 1.074 (0.829,1.393)  | 0.589 | 0.909 (0.636,1.299)  | 0.600 |
| Knee Prop High Deprivation | 1.005 (0.997,1.014)   | 0.237 | 0.968 (0.784,1.195)   | 0.761 | 0.986 (0.974,0.998)   | 0.023 | 1.224 (1.099,1.363)  | 0.000 | 1.075 (0.956,1.209)  | 0.225 | 1.031 (0.911,1.166)  | 0.631 |
| Knee LoS                   | -0.024 (-0.052,0.004) | 0.089 | 0.176 (-0.352,0.703)  | 0.515 | -0.008 (-0.041,0.025) | 0.625 | 0.422 (0.117,0.726)  | 0.007 | 0.15 (-0.174,0.475)  | 0.364 | 0.396 (0.027,0.765)  | 0.036 |
| Knee Bed Occ               | 0.993 (0.984,1.001)   | 0.074 | 0.834 (0.711,0.979)   | 0.027 | 1 (0.989,1.011)       | 0.993 | 1.42 (1.269,1.59)    | 0.000 | 1.373 (1.217,1.548)  | 0.000 | 1.465 (1.287,1.667)  | 0.000 |
| Knee Public Private        | 1.006 (0.98,1.032)    | 0.667 | 0.621 (0.358,1.077)   | 0.090 | 0.985 (0.961,1.01)    | 0.225 | 1.119 (0.915,1.369)  | 0.274 | 1.318 (1.035,1.678)  | 0.025 | 1.139 (0.931,1.394)  | 0.205 |
| Elec Emerg Ratio           | 0.995 (0.987,1.002)   | 0.167 | 0.725 (0.637,0.825)   | 0.000 | 0.984 (0.975,0.994)   | 0.001 | 0.992 (0.889,1.106)  | 0.884 | 0.948 (0.84,1.07)    | 0.392 | 0.973 (0.879,1.076)  | 0.591 |

Supplementary Table T4. Interrupted time series model results with maximum auto-correlation lag 5

|                            | pre-trend              |       | level change           |       | trend change          |       | spring               |       | summer               |       | autumn               |       |
|----------------------------|------------------------|-------|------------------------|-------|-----------------------|-------|----------------------|-------|----------------------|-------|----------------------|-------|
|                            | estimate (95% CI)      | p     | estimate (95% CI)      | p     | estimate (95% CI)     | p     | estimate (95% CI)    | p     | estimate (95% CI)    | p     | estimate (95% CI)    | p     |
| Hip Admissions             | 0.995 (0.987,1.003)    | 0.249 | 1.055 (0.917,1.215)    | 0.454 | 0.991 (0.978,1.005)   | 0.217 | 1.19 (1.04,1.362)    | 0.012 | 1.207 (1.104,1.32)   | 0.000 | 1.101 (0.993,1.221)  | 0.069 |
| Hip Average Age            | -0.015 (-0.094,0.065)  | 0.714 | 1.571 (0.241,2.901)    | 0.021 | -0.06 (-0.168,0.048)  | 0.277 | 1.52 (-0.178,3.218)  | 0.079 | 2.09 (0.818,3.361)   | 0.001 | 1.031 (-0.639,2.701) | 0.226 |
| Hip Prop Women             | 0.999 (0.995,1.002)    | 0.503 | 0.966 (0.895,1.042)    | 0.367 | 1.007 (1.001,1.014)   | 0.027 | 1.023 (0.932,1.122)  | 0.636 | 1.088 (1,1.184)      | 0.051 | 0.981 (0.879,1.094)  | 0.727 |
| Hip Prop 2+ Charlson       | 0.994 (0.985,1.004)    | 0.261 | 1.411 (1.116,1.785)    | 0.004 | 1.01 (1,1.02)         | 0.042 | 1.195 (0.979,1.459)  | 0.079 | 1.306 (1.111,1.535)  | 0.001 | 1.003 (0.792,1.27)   | 0.981 |
| Hip Prop High Deprivation  | 1.003 (0.994,1.012)    | 0.551 | 1.027 (0.883,1.195)    | 0.729 | 1.004 (0.99,1.018)    | 0.577 | 0.937 (0.805,1.091)  | 0.400 | 0.877 (0.752,1.022)  | 0.092 | 0.996 (0.847,1.171)  | 0.961 |
| Hip LoS                    | -0.006 (-0.029,0.017)  | 0.605 | 0.312 (-0.12,0.745)    | 0.157 | -0.014 (-0.042,0.015) | 0.346 | 0.502 (0.286,0.718)  | 0.000 | 0.135 (-0.191,0.461) | 0.418 | 0.1 (-0.332,0.532)   | 0.650 |
| Hip Bed Occ                | 0.997 (0.987,1.008)    | 0.627 | 1 (0.862,1.161)        | 0.996 | 0.987 (0.97,1.004)    | 0.128 | 1.291 (1.116,1.492)  | 0.001 | 1.283 (1.14,1.444)   | 0.000 | 1.146 (0.99,1.326)   | 0.068 |
| Hip Public Private         | 1.013 (0.985,1.041)    | 0.377 | 0.477 (0.29,0.782)     | 0.003 | 0.981 (0.951,1.011)   | 0.218 | 0.992 (0.809,1.217)  | 0.939 | 1.361 (1.166,1.589)  | 0.000 | 1.038 (0.847,1.273)  | 0.718 |
| Knee Admissions            | 0.995 (0.992,0.999)    | 0.016 | 0.843 (0.761,0.934)    | 0.001 | 1.005 (0.998,1.012)   | 0.170 | 1.308 (1.154,1.482)  | 0.000 | 1.26 (1.16,1.369)    | 0.000 | 1.286 (1.178,1.403)  | 0.000 |
| Knee Average Age           | -0.078 (-0.152,-0.005) | 0.037 | -1.632 (-2.825,-0.439) | 0.007 | 0.211 (0.128,0.293)   | 0.000 | 0.926 (-0.072,1.924) | 0.069 | 0.953 (0.077,1.829)  | 0.033 | 0.354 (-0.422,1.13)  | 0.371 |
| Knee Prop Women            | 1.004 (0.999,1.009)    | 0.086 | 0.96 (0.861,1.071)     | 0.465 | 0.994 (0.987,1.001)   | 0.097 | 1.037 (0.973,1.105)  | 0.260 | 1.017 (0.922,1.121)  | 0.743 | 1.036 (0.966,1.111)  | 0.319 |
| Knee Prop 2+ Charlson      | 1.009 (0.993,1.026)    | 0.250 | 0.638 (0.468,0.869)    | 0.004 | 1.042 (1.021,1.064)   | 0.000 | 1.156 (0.931,1.436)  | 0.190 | 1.074 (0.841,1.372)  | 0.567 | 0.909 (0.626,1.321)  | 0.617 |
| Knee Prop High Deprivation | 1.005 (0.999,1.011)    | 0.107 | 0.968 (0.835,1.122)    | 0.664 | 0.986 (0.977,0.995)   | 0.003 | 1.224 (1.082,1.384)  | 0.001 | 1.075 (0.95,1.217)   | 0.251 | 1.031 (0.924,1.149)  | 0.586 |
| Knee LoS                   | -0.024 (-0.047,-0.001) | 0.042 | 0.176 (-0.2,0.551)     | 0.360 | -0.008 (-0.031,0.015) | 0.490 | 0.422 (0.033,0.81)   | 0.033 | 0.15 (-0.199,0.499)  | 0.398 | 0.396 (-0.011,0.803) | 0.057 |
| Knee Bed Occ               | 0.993 (0.986,0.999)    | 0.032 | 0.834 (0.728,0.956)    | 0.009 | 1 (0.991,1.009)       | 0.991 | 1.42 (1.308,1.542)   | 0.000 | 1.373 (1.213,1.553)  | 0.000 | 1.465 (1.318,1.627)  | 0.000 |
| Knee Public Private        | 1.006 (0.98,1.032)     | 0.667 | 0.621 (0.358,1.077)    | 0.090 | 0.985 (0.961,1.01)    | 0.225 | 1.119 (0.915,1.369)  | 0.274 | 1.318 (1.035,1.678)  | 0.025 | 1.139 (0.931,1.394)  | 0.205 |
| Elec Emerg Ratio           | 0.995 (0.987,1.003)    | 0.198 | 0.725 (0.635,0.828)    | 0.000 | 0.984 (0.974,0.995)   | 0.004 | 0.992 (0.898,1.095)  | 0.872 | 0.948 (0.835,1.077)  | 0.414 | 0.973 (0.849,1.114)  | 0.690 |

**The RECORD statement – checklist of items, extended from the STROBE statement, that should be reported in observational studies using routinely collected health data.**

|                           | Item No. | STROBE items                                                                                                                                                                               | Location in manuscript where items are reported | RECORD items                                                                                                                                                                                                                                                                                                                                                                                                                                | Location in manuscript where items are reported |
|---------------------------|----------|--------------------------------------------------------------------------------------------------------------------------------------------------------------------------------------------|-------------------------------------------------|---------------------------------------------------------------------------------------------------------------------------------------------------------------------------------------------------------------------------------------------------------------------------------------------------------------------------------------------------------------------------------------------------------------------------------------------|-------------------------------------------------|
| <b>Title and abstract</b> |          |                                                                                                                                                                                            |                                                 |                                                                                                                                                                                                                                                                                                                                                                                                                                             |                                                 |
|                           | 1        | (a) Indicate the study's design with a commonly used term in the title or the abstract (b) Provide in the abstract an informative and balanced summary of what was done and what was found |                                                 | RECORD 1.1: The type of data used should be specified in the title or abstract. When possible, the name of the databases used should be included.<br><br>RECORD 1.2: If applicable, the geographic region and timeframe within which the study took place should be reported in the title or abstract.<br><br>RECORD 1.3: If linkage between databases was conducted for the study, this should be clearly stated in the title or abstract. | Abstract P2 L35-37<br><br>Abstract P2 L35-38    |
| <b>Introduction</b>       |          |                                                                                                                                                                                            |                                                 |                                                                                                                                                                                                                                                                                                                                                                                                                                             |                                                 |
| Background rationale      | 2        | Explain the scientific background and rationale for the investigation being reported                                                                                                       |                                                 |                                                                                                                                                                                                                                                                                                                                                                                                                                             | Introduction P4-5 L76-113                       |
| Objectives                | 3        | State specific objectives, including any prespecified hypotheses                                                                                                                           |                                                 |                                                                                                                                                                                                                                                                                                                                                                                                                                             | Introduction P5 L107-113                        |
| <b>Methods</b>            |          |                                                                                                                                                                                            |                                                 |                                                                                                                                                                                                                                                                                                                                                                                                                                             |                                                 |
| Study Design              | 4        | Present key elements of study design early in the paper                                                                                                                                    |                                                 |                                                                                                                                                                                                                                                                                                                                                                                                                                             | Methods P5 L116-119                             |
| Setting                   | 5        | Describe the setting, locations, and relevant dates, including periods of recruitment, exposure, follow-up, and data collection                                                            |                                                 |                                                                                                                                                                                                                                                                                                                                                                                                                                             | Methods P5 L116-119<br>Methods P7-8 L70-176     |

|                              |   |                                                                                                                                                                                                                                                                                                                                                                                                                                                                                                                                                                                                                                                                                                                              |  |                                                                                                                                                                                                                                                                                                                                                                                                                                                                                                                                                                                                                                                                                                      |                                                     |
|------------------------------|---|------------------------------------------------------------------------------------------------------------------------------------------------------------------------------------------------------------------------------------------------------------------------------------------------------------------------------------------------------------------------------------------------------------------------------------------------------------------------------------------------------------------------------------------------------------------------------------------------------------------------------------------------------------------------------------------------------------------------------|--|------------------------------------------------------------------------------------------------------------------------------------------------------------------------------------------------------------------------------------------------------------------------------------------------------------------------------------------------------------------------------------------------------------------------------------------------------------------------------------------------------------------------------------------------------------------------------------------------------------------------------------------------------------------------------------------------------|-----------------------------------------------------|
| Participants                 | 6 | <p>(a) <i>Cohort study</i> - Give the eligibility criteria, and the sources and methods of selection of participants. Describe methods of follow-up</p> <p><i>Case-control study</i> - Give the eligibility criteria, and the sources and methods of case ascertainment and control selection. Give the rationale for the choice of cases and controls</p> <p><i>Cross-sectional study</i> - Give the eligibility criteria, and the sources and methods of selection of participants</p> <p>(b) <i>Cohort study</i> - For matched studies, give matching criteria and number of exposed and unexposed</p> <p><i>Case-control study</i> - For matched studies, give matching criteria and the number of controls per case</p> |  | <p>RECORD 6.1: The methods of study population selection (such as codes or algorithms used to identify subjects) should be listed in detail. If this is not possible, an explanation should be provided.</p> <p>RECORD 6.2: Any validation studies of the codes or algorithms used to select the population should be referenced. If validation was conducted for this study and not published elsewhere, detailed methods and results should be provided.</p> <p>RECORD 6.3: If the study involved linkage of databases, consider use of a flow diagram or other graphical display to demonstrate the data linkage process, including the number of individuals with linked data at each stage.</p> | Methods P6<br>L141-147<br>Supplementary<br>Table T1 |
| Variables                    | 7 | Clearly define all outcomes, exposures, predictors, potential confounders, and effect modifiers. Give diagnostic criteria, if applicable.                                                                                                                                                                                                                                                                                                                                                                                                                                                                                                                                                                                    |  | RECORD 7.1: A complete list of codes and algorithms used to classify exposures, outcomes, confounders, and effect modifiers should be provided. If these cannot be reported, an explanation should be provided.                                                                                                                                                                                                                                                                                                                                                                                                                                                                                      | Methods P6-7<br>L141-169                            |
| Data sources/<br>measurement | 8 | For each variable of interest, give sources of data and details of methods of assessment (measurement). Describe comparability of assessment methods if there is more than one group                                                                                                                                                                                                                                                                                                                                                                                                                                                                                                                                         |  |                                                                                                                                                                                                                                                                                                                                                                                                                                                                                                                                                                                                                                                                                                      | Methods P5-6<br>L120-140                            |



|                                                                                                                                                                                                 |                                  |    |                                                                                                                                                                                                                                                                                                                                                                                                                                                                                                                                                                      |  |                                                                                                                                                       |                              |
|-------------------------------------------------------------------------------------------------------------------------------------------------------------------------------------------------|----------------------------------|----|----------------------------------------------------------------------------------------------------------------------------------------------------------------------------------------------------------------------------------------------------------------------------------------------------------------------------------------------------------------------------------------------------------------------------------------------------------------------------------------------------------------------------------------------------------------------|--|-------------------------------------------------------------------------------------------------------------------------------------------------------|------------------------------|
| 1<br>2<br>3<br>4<br>5<br>6<br>7<br>8<br>9<br>10<br>11<br>12<br>13<br>14<br>15<br>16<br>17<br>18<br>19<br>20<br>21<br>22<br>23<br>24<br>25<br>26<br>27<br>28<br>29<br>30<br>31<br>32<br>33<br>34 | Bias                             | 9  | Describe any efforts to address potential sources of bias                                                                                                                                                                                                                                                                                                                                                                                                                                                                                                            |  |                                                                                                                                                       | Methods P7-8<br>L170-185,    |
|                                                                                                                                                                                                 | Study size                       | 10 | Explain how the study size was arrived at                                                                                                                                                                                                                                                                                                                                                                                                                                                                                                                            |  |                                                                                                                                                       | Methods P6<br>L141-147       |
|                                                                                                                                                                                                 | Quantitative variables           | 11 | Explain how quantitative variables were handled in the analyses. If applicable, describe which groupings were chosen, and why                                                                                                                                                                                                                                                                                                                                                                                                                                        |  |                                                                                                                                                       | Methods P6-7<br>L141-169     |
|                                                                                                                                                                                                 | Statistical methods              | 12 | (a) Describe all statistical methods, including those used to control for confounding<br>(b) Describe any methods used to examine subgroups and interactions<br>(c) Explain how missing data were addressed<br>(d) <i>Cohort study</i> - If applicable, explain how loss to follow-up was addressed<br><i>Case-control study</i> - If applicable, explain how matching of cases and controls was addressed<br><i>Cross-sectional study</i> - If applicable, describe analytical methods taking account of sampling strategy<br>(e) Describe any sensitivity analyses |  |                                                                                                                                                       | Methods P7-8<br>L170-185     |
| 35<br>36<br>37<br>38<br>39<br>40<br>41<br>42<br>43<br>44<br>45<br>46<br>47                                                                                                                      | Data access and cleaning methods |    | ..                                                                                                                                                                                                                                                                                                                                                                                                                                                                                                                                                                   |  | RECORD 12.1: Authors should describe the extent to which the investigators had access to the database population used to create the study population. | Data Sharing P17<br>L392-400 |

|                  |    |                                                                                                                                                                                                                                                                                                                                                 |  |                                                                                                                                                                                                                                                                                                                    |                                                   |
|------------------|----|-------------------------------------------------------------------------------------------------------------------------------------------------------------------------------------------------------------------------------------------------------------------------------------------------------------------------------------------------|--|--------------------------------------------------------------------------------------------------------------------------------------------------------------------------------------------------------------------------------------------------------------------------------------------------------------------|---------------------------------------------------|
|                  |    |                                                                                                                                                                                                                                                                                                                                                 |  | RECORD 12.2: Authors should provide information on the data cleaning methods used in the study.                                                                                                                                                                                                                    | Methods P6-7<br>L141-169                          |
| Linkage          |    | ..                                                                                                                                                                                                                                                                                                                                              |  | RECORD 12.3: State whether the study included person-level, institutional-level, or other data linkage across two or more databases. The methods of linkage and methods of linkage quality evaluation should be provided.                                                                                          | N/A                                               |
| <b>Results</b>   |    |                                                                                                                                                                                                                                                                                                                                                 |  |                                                                                                                                                                                                                                                                                                                    |                                                   |
| Participants     | 13 | (a) Report the numbers of individuals at each stage of the study ( <i>e.g.</i> , numbers potentially eligible, examined for eligibility, confirmed eligible, included in the study, completing follow-up, and analysed)<br>(b) Give reasons for non-participation at each stage.<br>(c) Consider use of a flow diagram                          |  | RECORD 13.1: Describe in detail the selection of the persons included in the study ( <i>i.e.</i> , study population selection) including filtering based on data quality, data availability and linkage. The selection of included persons can be described in the text and/or by means of the study flow diagram. | Methods P6<br>L141-147<br><br>Results P8 L191-194 |
| Descriptive data | 14 | (a) Give characteristics of study participants ( <i>e.g.</i> , demographic, clinical, social) and information on exposures and potential confounders<br>(b) Indicate the number of participants with missing data for each variable of interest<br>(c) <i>Cohort study</i> - summarise follow-up time ( <i>e.g.</i> , average and total amount) |  |                                                                                                                                                                                                                                                                                                                    | Results P8 L191-194                               |
| Outcome data     | 15 | <i>Cohort study</i> - Report numbers of outcome events or summary measures over time<br><i>Case-control study</i> - Report numbers in each exposure                                                                                                                                                                                             |  |                                                                                                                                                                                                                                                                                                                    | Results P8-9<br>L195-206                          |

|                   |    |                                                                                                                                                                                                                                                                                                                                                                                                                 |  |                                                                                                                                                                                                                                                                                                          |                             |
|-------------------|----|-----------------------------------------------------------------------------------------------------------------------------------------------------------------------------------------------------------------------------------------------------------------------------------------------------------------------------------------------------------------------------------------------------------------|--|----------------------------------------------------------------------------------------------------------------------------------------------------------------------------------------------------------------------------------------------------------------------------------------------------------|-----------------------------|
|                   |    | category, or summary measures of exposure<br><i>Cross-sectional study</i> - Report numbers of outcome events or summary measures                                                                                                                                                                                                                                                                                |  |                                                                                                                                                                                                                                                                                                          |                             |
| Main results      | 16 | (a) Give unadjusted estimates and, if applicable, confounder-adjusted estimates and their precision (e.g., 95% confidence interval). Make clear which confounders were adjusted for and why they were included<br>(b) Report category boundaries when continuous variables were categorized<br>(c) If relevant, consider translating estimates of relative risk into absolute risk for a meaningful time period |  |                                                                                                                                                                                                                                                                                                          | Results P9-11<br>L196-267   |
| Other analyses    | 17 | Report other analyses done— e.g., analyses of subgroups and interactions, and sensitivity analyses                                                                                                                                                                                                                                                                                                              |  |                                                                                                                                                                                                                                                                                                          | Results P9-11<br>L196-267   |
| <b>Discussion</b> |    |                                                                                                                                                                                                                                                                                                                                                                                                                 |  |                                                                                                                                                                                                                                                                                                          |                             |
| Key results       | 18 | Summarise key results with reference to study objectives                                                                                                                                                                                                                                                                                                                                                        |  |                                                                                                                                                                                                                                                                                                          | Discussion P11-12, L268-288 |
| Limitations       | 19 | Discuss limitations of the study, taking into account sources of potential bias or imprecision. Discuss both direction and magnitude of any potential bias                                                                                                                                                                                                                                                      |  | RECORD 19.1: Discuss the implications of using data that were not created or collected to answer the specific research question(s). Include discussion of misclassification bias, unmeasured confounding, missing data, and changing eligibility over time, as they pertain to the study being reported. | Discussion P12-13 L289-303  |
| Interpretation    | 20 | Give a cautious overall interpretation of results considering objectives,                                                                                                                                                                                                                                                                                                                                       |  |                                                                                                                                                                                                                                                                                                          | Discussion P13-14 L317-340  |

|                                                           |    |                                                                                                                                                               |  |                                                                                                                                                          |                                                        |
|-----------------------------------------------------------|----|---------------------------------------------------------------------------------------------------------------------------------------------------------------|--|----------------------------------------------------------------------------------------------------------------------------------------------------------|--------------------------------------------------------|
|                                                           |    | limitations, multiplicity of analyses, results from similar studies, and other relevant evidence                                                              |  |                                                                                                                                                          |                                                        |
| Generalisability                                          | 21 | Discuss the generalisability (external validity) of the study results                                                                                         |  |                                                                                                                                                          | Discussion P13<br>L294-303                             |
| <b>Other Information</b>                                  |    |                                                                                                                                                               |  |                                                                                                                                                          |                                                        |
| Funding                                                   | 22 | Give the source of funding and the role of the funders for the present study and, if applicable, for the original study on which the present article is based |  |                                                                                                                                                          | Funding<br>Statement P16<br>L375-380                   |
| Accessibility of protocol, raw data, and programming code |    | ..                                                                                                                                                            |  | RECORD 22.1: Authors should provide information on how to access any supplemental information such as the study protocol, raw data, or programming code. | Methods P8<br>L186-188<br>Data Sharing P17<br>L392-400 |

\*Reference: Benchimol EI, Smeeth L, Guttman A, Harron K, Moher D, Petersen I, Sørensen HT, von Elm E, Langan SM, the RECORD Working Committee. The REporting of studies Conducted using Observational Routinely-collected health Data (RECORD) Statement. *PLoS Medicine* 2015; in press.

\*Checklist is protected under Creative Commons Attribution ([CC BY](https://creativecommons.org/licenses/by/4.0/)) license.

# BMJ Open

## The impact of pausing elective hip and knee replacement surgery during winter 2017 on subsequent service provision at a major NHS Trust: a descriptive observational study using interrupted time series

|                                 |                                                                                                                                                                                                                                                                                                                                                                                                                                                                                                                                                                                                                                                                                                                                                                                                                                                                                                                             |
|---------------------------------|-----------------------------------------------------------------------------------------------------------------------------------------------------------------------------------------------------------------------------------------------------------------------------------------------------------------------------------------------------------------------------------------------------------------------------------------------------------------------------------------------------------------------------------------------------------------------------------------------------------------------------------------------------------------------------------------------------------------------------------------------------------------------------------------------------------------------------------------------------------------------------------------------------------------------------|
| Journal:                        | <i>BMJ Open</i>                                                                                                                                                                                                                                                                                                                                                                                                                                                                                                                                                                                                                                                                                                                                                                                                                                                                                                             |
| Manuscript ID                   | bmjopen-2022-066398.R1                                                                                                                                                                                                                                                                                                                                                                                                                                                                                                                                                                                                                                                                                                                                                                                                                                                                                                      |
| Article Type:                   | Original research                                                                                                                                                                                                                                                                                                                                                                                                                                                                                                                                                                                                                                                                                                                                                                                                                                                                                                           |
| Date Submitted by the Author:   | 31-Jan-2023                                                                                                                                                                                                                                                                                                                                                                                                                                                                                                                                                                                                                                                                                                                                                                                                                                                                                                                 |
| Complete List of Authors:       | Jones, Tim; University Hospitals Bristol and Weston NHS Foundation Trust, NIHR ARC West; University of Bristol, Department of Population Health Sciences<br>Penfold, Chris; University Hospitals Bristol and Weston NHS Foundation Trust, NIHR ARC West; University of Bristol, Musculoskeletal Research Unit<br>Redaniel, Maria Theresa; University Hospitals Bristol and Weston NHS Foundation Trust, NIHR ARC West; University of Bristol, Population Health Sciences, Bristol Medical School<br>Eyles, Emily; University Hospitals Bristol and Weston NHS Foundation Trust, NIHR ARC West; University of Bristol, Population Health Sciences, Bristol Medical School<br>Keen, Tim; North Bristol NHS Trust<br>Elliott, Andrew; North Bristol NHS Trust<br>Blom, AW; University of Bristol, Translational Health Sciences, Bristol Medical School<br>Judge, Andrew; University of Bristol, Musculoskeletal Research Unit |
| <b>Primary Subject Heading</b>: | Health services research                                                                                                                                                                                                                                                                                                                                                                                                                                                                                                                                                                                                                                                                                                                                                                                                                                                                                                    |
| Secondary Subject Heading:      | Surgery                                                                                                                                                                                                                                                                                                                                                                                                                                                                                                                                                                                                                                                                                                                                                                                                                                                                                                                     |
| Keywords:                       | Knee < ORTHOPAEDIC & TRAUMA SURGERY, Hip < ORTHOPAEDIC & TRAUMA SURGERY, Orthopaedic & trauma surgery < SURGERY, Human resource management < HEALTH SERVICES ADMINISTRATION & MANAGEMENT                                                                                                                                                                                                                                                                                                                                                                                                                                                                                                                                                                                                                                                                                                                                    |
|                                 |                                                                                                                                                                                                                                                                                                                                                                                                                                                                                                                                                                                                                                                                                                                                                                                                                                                                                                                             |

SCHOLARONE™  
Manuscripts



I, the Submitting Author has the right to grant and does grant on behalf of all authors of the Work (as defined in the below author licence), an exclusive licence and/or a non-exclusive licence for contributions from authors who are: i) UK Crown employees; ii) where BMJ has agreed a CC-BY licence shall apply, and/or iii) in accordance with the terms applicable for US Federal Government officers or employees acting as part of their official duties; on a worldwide, perpetual, irrevocable, royalty-free basis to BMJ Publishing Group Ltd ("BMJ") its licensees and where the relevant Journal is co-owned by BMJ to the co-owners of the Journal, to publish the Work in this journal and any other BMJ products and to exploit all rights, as set out in our [licence](#).

The Submitting Author accepts and understands that any supply made under these terms is made by BMJ to the Submitting Author unless you are acting as an employee on behalf of your employer or a postgraduate student of an affiliated institution which is paying any applicable article publishing charge ("APC") for Open Access articles. Where the Submitting Author wishes to make the Work available on an Open Access basis (and intends to pay the relevant APC), the terms of reuse of such Open Access shall be governed by a Creative Commons licence – details of these licences and which [Creative Commons](#) licence will apply to this Work are set out in our licence referred to above.

Other than as permitted in any relevant BMJ Author's Self Archiving Policies, I confirm this Work has not been accepted for publication elsewhere, is not being considered for publication elsewhere and does not duplicate material already published. I confirm all authors consent to publication of this Work and authorise the granting of this licence.

1  
2  
3 1 **Title:** The impact of pausing elective hip and knee replacement surgery during winter 2017 on  
4  
5 2 subsequent service provision at a major NHS Trust: a descriptive observational study using  
6  
7 3 interrupted time series  
8  
9

10 4  
11  
12  
13 5 **Authors:** Tim Jones<sup>1,2,3</sup>, Christopher Penfold<sup>1,2,3</sup>, Maria Theresa Redaniel<sup>1,2</sup>, Emily Eyles<sup>1,2</sup>, Tim Keen<sup>4</sup>,  
14  
15 6 Andrew Elliott<sup>4</sup>, Ashley Blom<sup>2,3</sup>, Andrew Judge<sup>3,5</sup>  
16  
17

18  
19  
20  
21 8 <sup>1</sup> NIHR ARC West, University Hospitals Bristol NHS Foundation Trust, Bristol, BS1 2NT, UK  
22

23  
24 9 <sup>2</sup> Department of Population Health Sciences, Bristol Medical School, University of Bristol, BS8 2PS,  
25  
26 10 UK  
27

28  
29 11 <sup>3</sup> Musculoskeletal Research Unit, Translational Health Sciences, Bristol Medical School, University of  
30  
31 12 Bristol, Learning and Research Building, Level 1, Southmead Hospital, Bristol, BS10 5NB, UK  
32

33  
34 13 <sup>4</sup> North Bristol NHS Trust, Southmead Hospital, Westbury-on-Trym, Bristol, BS10 5NB, UK  
35

36  
37 14 <sup>5</sup> National Institute for Health Research Bristol Biomedical Research Centre, University Hospitals  
38  
39 15 Bristol and Weston NHS Foundation Trust and University of Bristol, Bristol, UK  
40

41  
42  
43 16  
44 17 **Corresponding author:**

45  
46 18 Tim Jones  
47 19 Research Fellow  
48 20 NIHR ARC West,  
49 21 9<sup>th</sup> Floor Whitefriars,  
50 22 Lewin's Mead  
51 23 Bristol, BS1 2NT  
52 24 United Kingdom  
53

54  
55 25  
56 26 Tel: ++44 (0)117 342 1265

57 27 [Timothy.Jones@bristol.ac.uk](mailto:Timothy.Jones@bristol.ac.uk)  
58

59 28  
60 29 **Word count [3,826]**

1  
2  
3 30 **ABSTRACT**  
4

5 31 **Objectives:** To explore the impact of a temporary cancellation of elective surgery in winter 2017 on  
6  
7 32 trends in primary hip and knee replacement at a major NHS Trust, and whether lessons can be learnt  
8  
9 33 about efficient surgery provision.  
10

11  
12 34 **Design and Setting:** Observational descriptive study using interrupted time series analysis of hospital  
13  
14 35 records to explore trends in primary hip and knee replacement surgery at a major NHS Trust, as well  
15  
16 36 as patient characteristics, 2016-2019.  
17

18  
19 37 **Intervention:** A temporary cancellation of elective services for two months in winter 2017  
20  
21

22 38 **Outcomes:** NHS-funded hospital admissions for primary hip or knee replacement, length of stay and  
23  
24 39 bed occupancy. Additionally, we explored the ratio of elective to emergency admissions at the Trust  
25  
26 40 as a measure of elective capacity, and the ratio of public to private provision of NHS-funded hip and  
27  
28 41 knee surgery.  
29

30  
31 42 **Results:** After winter 2017 there was a sustained reduction in the number of knee replacements, a  
32  
33 43 decrease in the proportion of most deprived people having knee replacements, and an increase in  
34  
35 44 average age for knee replacement and comorbidity for both types of surgery. The ratio of public to  
36  
37 45 private provision dropped after winter 2017, and elective capacity generally has reduced over time.  
38  
39 46 There was clear seasonality in provision of elective surgery, with less-complex patients admitted  
40  
41 47 during winter.  
42  
43

44  
45 48 **Conclusions:** Declining elective capacity and seasonality has a marked effect on the provision of joint  
46  
47 49 replacement, despite efficiency improvements in hospital treatment. The Trust has outsourced less  
48  
49 50 complex patients to independent providers, and/or treated them during winter when capacity is  
50  
51 51 most limited. There is a need to explore whether these are strategies that could be used explicitly to  
52  
53 52 maximise the use of limited elective capacity, provide benefit to patients, and value for money for  
54  
55 53 taxpayers.  
56  
57  
58  
59  
60



1  
2  
3 54 **STRENGTH AND LIMITATIONS OF THIS STUDY**  
4  
5

- 6 55 • Trends analyses using data obtained from the electronic health records of a local hospital  
7  
8 56 NHS Trust are informative for clinicians and service managers in monitoring changes in  
9  
10 57 planning and delivery of elective surgery, and could be regularly updated in near real time  
11  
12 58 for monitoring.  
13  
14 59 • The inclusion of wider hospital admissions data beyond the NHS Trust allows us to estimate  
15  
16 60 the proportion of people within the Trust catchment area having NHS-funded treatment at  
17  
18 61 independent providers.  
19  
20 62 • We report the experience of one NHS Trust that is one of the larger elective orthopaedic  
21  
22 63 centres - the findings may not be generalisable to or reflect the experience of other trusts.  
23  
24 64 • Our study does not include privately funded, privately provided hip and knee surgery which  
25  
26 65 may also have been changing over time.  
27  
28  
29  
30  
31  
32  
33  
34  
35  
36  
37  
38  
39  
40  
41  
42  
43  
44  
45  
46  
47  
48  
49  
50  
51  
52  
53  
54  
55  
56  
57  
58  
59  
60

## 75 INTRODUCTION

76 Primary hip and knee replacement operations are common planned elective surgical procedures.

77 They are highly clinically effective for improving symptoms of pain and functional limitations, and

78 have been shown to be safe and cost-effective.<sup>1-4</sup> Around 100,000 hip<sup>4</sup> and over 100,000 knee

79 operations<sup>3</sup> are carried out each year in the UK. Demand for these operations has been increasing

80 substantially in recent decades<sup>5</sup> with an ageing population, rising levels of obesity, and widening

81 indications for surgery in younger patient groups.<sup>3 4</sup>

82 Orthopaedic services have become more efficient over time, with length of hospital stay for primary

83 hip and knee replacements reducing from around 15 days in 1997 to roughly 5.5 days in 2014.<sup>6</sup> This is

84 largely due to the introduction of 'fast track' surgery and enhanced recovery services,<sup>7</sup> which reduce

85 length of stay whilst maintaining patient safety and outcomes of surgery.<sup>6</sup> However, over the past

86 decade there has also been a reduction in the numbers of hospital beds and operating theatres

87 available for hip and knee replacement patients.<sup>8</sup> Waiting lists for orthopaedic procedures have been

88 growing over time, and the average time people wait for treatment once on the waiting list has also

89 increased.<sup>9</sup>

90 Pressures on elective surgery are exacerbated during winter, when resources for planned surgery are

91 often displaced by more acute, unplanned hospital admissions.<sup>8</sup> At the end of 2017, this led to all

92 planned elective hip and knee replacement operations in England being cancelled for the whole of

93 January.<sup>10</sup> Even before the COVID-19 pandemic, over half a million people were already on the waiting

94 list.<sup>11</sup> Patients are having to wait longer with deteriorating severe pain and functional limitation,

95 affecting their health and quality of life. The COVID-19 pandemic has had an even greater impact on

96 cancelling planned elective surgery, with over 635,000 people waiting for hip and knee replacements

97 in April 2021, more than 10% of these waiting over a year, and over a third waiting longer than the 18

98 week target.<sup>11</sup>

1  
2  
3 99 The winter of 2017 provides a form of 'natural experiment', where elective capacity was intentionally  
4  
5 100 reduced close to zero. A natural experimental design is a valid methodological approach to evaluate  
6  
7 101 the impact of a range of events, policies and interventions which are not under the control of  
8  
9 102 researchers.<sup>12</sup> Researchers can use the variation in exposure that natural experiments generate to  
10  
11 103 analyse their impact on health outcomes. This provides a form of quasi-experimental study, where we  
12  
13 104 can explore trends in provision of elective surgery before and after Winter 2017, which is a robust  
14  
15 105 approach to explore real-world impact when randomisation is not possible.<sup>13 14</sup>

16  
17  
18  
19 106 Our aim was to understand what happens after common, planned elective surgery is temporarily  
20  
21 107 cancelled, and how this might inform optimum planning of elective surgery when capacity is limited,  
22  
23 108 such as following the COVID-19 pandemic. We used interrupted time series analysis to model trends  
24  
25 109 in elective hip and knee replacement surgery for a major NHS Trust from 2016 to 2019 and see how  
26  
27 110 these were impacted by the withdrawal of elective surgery in winter 2017. We explored these trends  
28  
29 111 by patient factors (age, sex, deprivation, number of comorbidities) and seasonality to see when  
30  
31 112 demand was highest for different patient groups.

32  
33  
34  
35  
36 113

## 37 114 **METHODS**

38  
39  
40  
41 115 This study is a longitudinal observational descriptive study using routinely collected administrative  
42  
43 116 information about patients admitted to a major NHS Trust for elective hip and knee replacements,  
44  
45 117 2016 to 2019. It was developed and reported according to the RECORD extension<sup>15</sup> to STROBE  
46  
47 118 guidelines for observational studies using routinely collected data.

### 48 49 50 119 **Data Sources**

51  
52  
53 120 We used two data sources for our analyses. The first was an extract of elective primary hip and knee  
54  
55 121 replacement inpatient admissions identified from the Trust's electronic medical records (EMR)  
56  
57 122 between 1<sup>st</sup> January 2016 and 31<sup>st</sup> December 2019. Up to 29 diagnoses were provided per entry using  
58  
59 123 the International Classification of Diseases version 10 (ICD-10), and up to 11 procedures were provided

1  
2  
3 124 per entry using the Office of Population Censuses and Surveys Classification of Interventions and  
4  
5 125 Procedures version 4 (OPCS-4). The extract included patient demographics such as age, sex,  
6  
7 126 deprivation quintile, and comorbidities; and other characteristics of the hospital admissions such as  
8  
9  
10 127 length of stay. This data source was used for all analyses of hip and knee replacements at the Trust,  
11  
12 128 including those relating to patient demographics, length of stay, and bed occupancy.  
13  
14

15 129 The second data source was pseudonymised national admitted patient care Hospital Episode  
16  
17 130 Statistics (HES-APC) between 1<sup>st</sup> January 2016 and 31<sup>st</sup> December 2019. HES-APC is a routinely  
18  
19 131 collected dataset that records all episodes of admitted (day case or inpatient) care provided to  
20  
21 132 patients at NHS hospitals in England and to NHS-funded patients treated in independent hospitals.<sup>16</sup>  
22  
23 133 Each episode represents a period of care under one consultant team. Up to 20 diagnoses and 24  
24  
25 134 clinical procedures are recorded per episode using ICD-10 codes and OPCS-4 codes, respectively. HES  
26  
27 135 also includes the Lower Super Output Area (LSOA; an area of around 1,500 people) of residence for  
28  
29 136 each patient, which can be linked to CCG of residence. This data source was used to estimate  
30  
31 137 elective capacity overall at the Trust, and the ratio of public/private provision of hip and knee  
32  
33 138 replacements in the catchment area for the Trust (see details below), which could not be gathered  
34  
35 139 from the extract provided from the Trust EMR.  
36  
37  
38  
39

#### 40 140 **Hospital admissions for hip and knee replacements**

41  
42 141 Hospital admissions for elective hip and knee replacements were identified by entries with a primary  
43  
44 142 procedure code representing primary hip or knee replacement (Supplementary Table T1) using the  
45  
46 143 Trust EMR. We used this information to explore summary characteristics of the hospital admissions  
47  
48 144 over time (overall counts of admissions, average age, proportion of women, proportion with 2+  
49  
50 145 comorbidities, proportion in the two most deprived quintiles) stratified by primary hip or knee  
51  
52 146 replacements.  
53  
54  
55

#### 56 57 147 **Length of stay and bed occupancy**

1  
2  
3 148 We used the average number of overnight stays in hospital (days) for length of stay, trimmed at 30  
4  
5 149 days to exclude a small number of outliers (n=32, 0.6%). Trimming allowed us to model averages  
6  
7 150 assuming a roughly normal distribution which we felt was more easily interpretable. Bed occupancy  
8  
9 151 was the total number of beds used overnight for hip and knee replacement patients.  
10  
11  
12

### 13 152 **Comorbidity of Admissions**

14  
15 153 For each admission, we counted the number of conditions from the Charlson comorbidity index<sup>17</sup>  
16  
17 154 recorded in the diagnosis fields. The Charlson index provides a summary of weighted scores relating  
18  
19 155 to different comorbidities and has been shown to be associated with mortality. Admissions were  
20  
21 156 categorised into those with zero, one, and two or more Charlson comorbidities.  
22  
23  
24

### 25 157 **Ratio of Elective to Emergency Admissions**

26  
27 158 To estimate the ratio of elective to emergency admissions for all purposes at the Trust (as a proxy for  
28  
29 159 elective capacity), we extracted all hospital admissions from HES-APC with the Trust as a provider  
30  
31 160 and categorised them into elective and emergency (admission method beginning with '1' or '2',  
32  
33 161 respectively).  
34  
35  
36

### 37 162 **Ratio of Public to Private Provision of Hip and Knee Replacements**

38  
39 163 To estimate the ratio of public to private provision of NHS-funded elective hip and knee surgery for  
40  
41 164 the Trust catchment area, we extracted all hospital admissions for primary hip and knee  
42  
43 165 replacements (codes in Supplementary Table T1) for residents of the major local clinical  
44  
45 166 commissioning groups (CCGs) from HES-APC (using 2021 CCG boundaries after local CCGs had  
46  
47 167 merged into one CCG<sup>18</sup>), and categorised providers into public and private (provider code beginning  
48  
49 168 with 'R' or 'N', respectively).  
50  
51  
52

### 53 169 **Statistical Analysis**

54  
55 170 We explored the change in trend for the following outcomes before/after the winter 2017 cancellation  
56  
57 171 of elective surgery, stratified by primary hip and knee replacements: number of hospital admissions;  
58  
59  
60

1  
2  
3 172 average age of patients; proportion of women; proportion with 2+ comorbidities; proportion in more  
4  
5 173 deprived deprivation quintiles (4 and 5); average length of stay; bed occupancy; and ratio of public to  
6  
7 174 private provision of surgery. Additionally, we explored the overall ratio of elective to emergency  
8  
9 175 admissions at the hospital for any purpose without stratification. For each of the outcomes, we  
10  
11 176 conducted interrupted time series (ITS) analyses using segmented regression models comparing  
12  
13 177 hospital admissions in the 'before' period (January 2016 to November 2017) to the 'after' period  
14  
15 178 (February 2018 to December 2019). We excluded the winter 2017 period when admissions were very  
16  
17 179 low (December 2017 and January 2018). The ITS analyses explored the 'pre-trend' before winter 2017,  
18  
19 180 and how this trend changed after winter 2017<sup>12 19</sup>, allowing for an immediate 'level change' up or  
20  
21 181 down in February 2018, and a longer-term 'trend change' in the slope afterwards. We explored  
22  
23 182 seasonality in the data by including indicator variables for spring, summer, and autumn<sup>19</sup> compared  
24  
25 183 to winter as a baseline, and adjusted for serial autocorrelation using Newey-West standard errors with  
26  
27 184 a maximum lag of two<sup>20-22</sup>. For count or proportion outcomes (number of admissions, proportion  
28  
29 185 women, proportion with 2+ comorbidities, proportion in top two deprivation quintiles, bed  
30  
31 186 occupancy) segmented Poisson regression models were fit to the data, whilst for averages/ratios  
32  
33 187 (average age, average length of stay, ratio of elective to emergency admissions, ratio of public to  
34  
35 188 private provision) segmented linear regression models were fit, using the 'glm' command in Stata.  
36  
37 189 Sensitivity analyses were conducted adjusting the maximum lag for serial autocorrelation to zero and  
38  
39 190 five; this would not affect point estimates but could alter standard errors, confidence intervals, and p-  
40  
41 191 values.

42  
43 192 All statistical analyses were conducted using Stata/MP version 16.1. Smoothed trends were fit to the  
44  
45 193 data on all plots using the 'lowess' command with bandwidth 0.3. Stata code is available at:  
46  
47 194 [https://github.com/jonestim2002/hdr\\_uk\\_hospital\\_efficiency](https://github.com/jonestim2002/hdr_uk_hospital_efficiency)

## 195 **Patient and public involvement**

1  
2  
3 196 Initial research ideas for the grant application of which this work is part were presented to the public  
4  
5 197 in a workshop and suggestions and comments were incorporated in the protocol. Feedback during  
6  
7 198 the workshop was positive, with participants agreeing with the research objectives and the  
8  
9 199 identified need.  
10  
11  
12  
13 200  
14  
15

## 201 RESULTS

### 202 *Descriptive information and demographics*

203 A total of 2,623 patients had a hip replacement and 2,674 had a knee replacement at the Trust in the  
24 204 4 years between 2016 and 2019. The mean age of patients was 67 years and 60% were women for  
25  
26 205 both types of operations.  
27  
28  
29 206  
30  
31

### 302 *Trend changes after winter 2017*

303 Table 1 shows the results of our interrupted time series analyses for all outcomes, including the  
304 trend before winter 2017 (pre-trend), any immediate change after winter 2017 (level change) and  
305 any change in the slope after winter 2017 (trend change). These are described in more detail below.  
306  
307  
308  
309  
310  
311

312 **Table 1. Interrupted time series model results**

|                     | pre-trend          |       | level change               |              | trend change            |              |
|---------------------|--------------------|-------|----------------------------|--------------|-------------------------|--------------|
|                     | estimate (95% CI)  | p     | estimate (95% CI)          | p            | estimate (95% CI)       | p            |
| Hip Admissions      | 1 (0.99,1)         | 0.300 | 1.06 (0.91,1.22)           | 0.469        | 0.99 (0.98,1.01)        | 0.239        |
| Hip Age*            | -0.01 (-0.1,0.07)  | 0.737 | 1.57 (-0.1,3.24)           | 0.065        | -0.06 (-0.17,0.05)      | 0.307        |
| Hip Prop Women      | 1 (0.99,1)         | 0.582 | 0.97 (0.86,1.08)           | 0.549        | 1.01 (1,1.02)           | 0.089        |
| Hip Charlson        | 0.99 (0.98,1.01)   | 0.380 | <b>1.41 (1.06,1.87)</b>    | <b>0.017</b> | 1.01 (0.99,1.03)        | 0.220        |
| Hip Deprivation     | 1 (0.99,1.01)      | 0.587 | 1.03 (0.87,1.21)           | 0.754        | 1 (0.99,1.02)           | 0.660        |
| Hip LoS*            | -0.01 (-0.03,0.02) | 0.660 | 0.31 (-0.19,0.82)          | 0.225        | -0.01 (-0.05,0.02)      | 0.425        |
| Hip Bed Occ         | 1 (0.99,1.01)      | 0.643 | 1 (0.84,1.19)              | 0.997        | 0.99 (0.97,1)           | 0.149        |
| Hip Public Private* | 0.01 (-0.02,0.04)  | 0.377 | <b>-0.74 (-1.24,-0.25)</b> | <b>0.003</b> | -0.02 (-0.05,0.01)      | 0.218        |
| Knee Admissions     | 1 (0.99,1)         | 0.106 | <b>0.84 (0.73,0.98)</b>    | <b>0.022</b> | 1 (1,1.01)              | 0.256        |
| Knee Age*           | -0.08 (-0.16,0)    | 0.054 | <b>-1.63 (-2.99,-0.28)</b> | <b>0.018</b> | <b>0.21 (0.12,0.31)</b> | <b>0.000</b> |

|                      |                   |       |                    |       |                     |       |
|----------------------|-------------------|-------|--------------------|-------|---------------------|-------|
| Knee Prop Women      | 1 (1,1.01)        | 0.150 | 0.96 (0.85,1.08)   | 0.513 | 0.99 (0.99,1)       | 0.193 |
| Knee Charlson        | 1.01 (0.99,1.03)  | 0.249 | 0.64 (0.46,0.89)   | 0.009 | 1.04 (1.02,1.07)    | 0.001 |
| Knee Deprivation     | 1.01 (1,1.01)     | 0.189 | 0.97 (0.79,1.19)   | 0.758 | 0.99 (0.97,1)       | 0.021 |
| Knee LoS*            | -0.02 (-0.05,0)   | 0.058 | 0.18 (-0.28,0.63)  | 0.449 | -0.01 (-0.04,0.02)  | 0.566 |
| Knee Bed Occ         | 0.99 (0.98,1)     | 0.103 | 0.83 (0.7,0.99)    | 0.037 | 1 (0.99,1.01)       | 0.993 |
| Knee Public Private* | 0.01 (-0.02,0.03) | 0.667 | -0.48 (-1.03,0.07) | 0.090 | -0.02 (-0.04,0.01)  | 0.225 |
| Elec Emerg Ratio*    | -0.01 (-0.01,0)   | 0.171 | -0.32 (-0.45,-0.2) | 0.000 | -0.02 (-0.03,-0.01) | 0.003 |

Notes: \*Linear regression model (additive) rather than Poisson regression model (multiplicative). Shaded cells indicate  $p < 0.05$ .

## Trends in hip and knee elective hospital admissions over time

The overall numbers of elective primary hip and knee replacement operations gradually declined over the study period from 63 hip and 65 knee replacements per month in 2016 to 49 hip and 51 knee replacements per month in 2019. Whilst there was a drop off in winter 2017, after elective surgery was re-started hip replacements resumed at similar numbers and continued to decline along a similar trajectory. Numbers of knee replacements dropped by 16% after winter 2017 (level change=0.843, 95% CI: 0.728 to 0.976,  $p=0.022$ ), and the slope appeared to level off, although there was little evidence for this in the regression model (trend change=1.005, 95% CI: 0.996 to 1.014,  $p=0.256$ ); see Figure 1 and Supplementary Table T2.

## Age on Admission

There was a change in the trend in average age for knee replacements after winter 2017 (trend change=+0.21, 95% CI: 0.12 to 0.31,  $p < 0.001$ ) towards treating older patients over time (+1.59 years of age per year); see Figure 2.

## Comorbidity of Admissions

There was a level change upwards in the proportion having hip replacements with 2+ comorbidities after winter 2017 (level change=1.411, 95% CI: 1.064 to 1.873,  $p=0.017$ ), and an upward slope change for knee replacements (trend change=1.042, 95% CI: 1.017 to 1.067,  $p=0.001$ ); see Figure 3.



1  
2  
3 235  
45 236 *Deprivation*

7 237 There was evidence of a reducing proportion of the most deprived people having knee replacements  
8  
9 238 after winter 2017 (trend change=0.986, 95% CI: 0.974 to 0.998, p=0.021).

11  
12 239  
1314 240 *Ratio of elective admissions to emergency admissions at the Trust*

17 241 There was an overall downward trend in the ratio of elective to emergency admissions at the Trust,  
18  
19 242 from an average of 2.91 (SD: 0.17) electives for every emergency in 2016 to 2.16 (SD: 0.06) in 2019;  
20  
21 243 see Supplementary Figure F1. The ratio reduced after winter 2017 (level change=-0.322, 95% CI: -  
22  
23 244 0.446 to -0.198, p<0.001), and started to decrease more rapidly afterwards (trend change=-0.016,  
24  
25 245 95% CI: -0.026 to -0.005, p=0.003).

26  
27  
28  
29 246  
30  
3132 247 *Ratio of public to private provision of hip/knee elective surgery at the Trust*

35 248 There was evidence of a level change downwards in public provision compared to private provision  
36  
37 249 after winter 2017 for both types of surgery, but particularly for hip replacements (hips level  
38  
39 250 change=-0.741, 95% CI: -1.237 to -0.245, p=0.003; knees level change=-0.476, 95% CI: -1.026 to  
40  
41 251 +0.074, p=0.09); see Figure 4.

42  
43  
44 252  
45  
4647 253 *Bed Occupancy*

50 254 For hip and knee replacements, bed occupancy has reduced over time, although there wasn't  
51  
52 255 evidence of this in the regression model for hip replacements, and there was a level change  
53  
54 256 downwards (level change=0.834, 95% CI: 0.704 to 0.989, p=0.037) for knee surgery after winter  
55  
56 257 2017; see Figure 5.

57  
58  
59  
60 258

259 *Length of Stay*

260 The average length of hospital stay was 5.5 days (SD: 5.9 days) for hip replacements and 5.2 days  
261 (SD: 5.0 days) for knee replacements in 2016, compared to 5.1 days (SD: 4.1 days) and 4.3 days (SD:  
262 3.4 days) respectively in 2019 (see Supplementary Figure F2). However, there was no evidence in the  
263 regression models for a change after winter 2017.

265 *Seasonality*

266 Supplementary Table T2 shows seasonality results for each of our interrupted time series analyses.  
267 Hip and knee operations were clearly seasonal, with higher admissions in non-winter months  
268 compared to winter; 21% higher in the highest season (summer) for hips (summer=1.207, 95% CI:  
269 1.094 to 1.332,  $p<0.001$ ), and 31% higher in the highest season (spring) for knee replacements  
270 (spring=1.308, 95% CI: 1.157 to 1.479,  $p<0.001$ ), excluding winter 2017. Bed occupancy for both  
271 types of operation was also seasonal, with lower occupancy in the winter months compared to all  
272 other seasons (see Supplementary Table T2); e.g. summer bed occupancy was 324 beds for hips and  
273 291 beds for knees on average compared to winter bed occupancy of 225 beds for hips and 199 beds  
274 for knees on average. Length of stay was longer in spring than winter for hip replacements  
275 (spring=+0.502 days, 95% CI: 0.214 to 0.79,  $p=0.001$ ), and longer in spring (+0.422 days, 95% CI:  
276 0.073 to 0.771,  $p=0.018$ ) and autumn (+0.396 days, 95% CI: 0.015 to 0.777,  $p=0.042$ ) compared to  
277 winter for knee replacements.

278 The ratio of public to private provision was higher in the summer (1.56 for hips and 1.28 for knees)  
279 compared to winter (1.22 and 0.99, respectively) months (hips summer=+0.308, 95% CI 0.154 to  
280 0.463,  $p<0.001$ ; knees summer=+0.276, 95% CI: 0.035 to 0.517,  $p=0.025$ ).

281 There was also some evidence of seasonality in the types of patients being admitted for hip and  
282 knee replacements. For hip replacements, the mean age of patients was 66 in winter compared to

1  
2  
3 283 68 in summer (summer=+2.09; 95% CI: 0.81 to 3.37, p = 0.001); a higher proportion were performed  
4  
5 284 on women in the summer (64%) compared to winter (58%) months (summer=1.088, 95% CI: 1.001 to  
6  
7 285 1.183, p=0.048); and a higher proportion of people had 2+ comorbidities in the summer (15.9%)  
8  
9 286 compared to winter (12.3%) months (summer=1.306, 95% CI: 1.096 to 1.557, p=0.003). For knee  
10  
11 287 replacements, there was a higher proportion of more deprived people (quintiles 4 and 5) in the  
12  
13 288 spring (37.6%) compared to the winter (30.2%) months (spring=1.224, 95% CI: 1.077 to 1.49,  
14  
15 289 p=0.002).

16  
17  
18  
19 290

## 22 291 **DISCUSSION**

### 25 292 *Principal findings*

26  
27  
28  
29 293 The temporary cancellation of elective services during winter 2017 does appear to have had some  
30  
31 294 impact on service provision at the Trust after that time. There was an immediate and sustained  
32  
33 295 reduction in the number of knee replacements being done at the Trust and this was also reflected in  
34  
35 296 the drop in bed occupancy for knee surgery. The average age for knee replacement and comorbidity  
36  
37 297 of hip and knee surgery patients increased after winter 2017, whilst the proportion of more deprived  
38  
39 298 people having knee replacements decreased, and the ratio of public to private provision of hip and  
40  
41 299 knee replacements in the local area dropped after winter 2017. This suggests an NHS-funded  
42  
43 300 outsourcing of less comorbid hip and knee replacement surgery to independent providers, and  
44  
45 301 therefore on average the patients being treated at the Trust became older and more comorbid.  
46  
47 302 There was a general decrease in capacity for elective surgery at the Trust (ratio of elective to  
48  
49 303 emergency admissions), mostly driven by increasing non-elective admissions even before the COVID-  
50  
51 304 19 pandemic. The winter 2017 cancellation may have been just one symptom of this overall pressure  
52  
53 305 on elective surgery that underlies some of the longer-term changes in provision.  
54  
55  
56  
57  
58  
59  
60

1  
2  
3 306 There was also some seasonality in service provision. It is no surprise that elective admissions and  
4  
5 307 bed occupancy are lower in winter when the hospital requires capacity for an increase in unplanned  
6  
7 308 admissions. There were also indications that people being admitted in winter were younger, less  
8  
9  
10 309 comorbid, and less deprived (particularly for knee surgery). Length of stay for hip and knee  
11  
12 310 replacements was lower in winter compared to spring. This suggests the admission of younger, less  
13  
14 311 comorbid patients during the winter months given the reduced elective capacity and delaying  
15  
16 312 surgery for more comorbid patients to when capacity is higher in the following months.

### 20 313 *Strengths and limitations*

21  
22  
23 314 Trends analyses such as these, using data obtained from the EHR of a local hospital NHS Trust, are  
24  
25 315 informative for clinicians and service managers in monitoring changes in planning and delivery of  
26  
27 316 elective surgery, and could be regularly updated in near real time for monitoring. This concept might  
28  
29 317 be informative for other commissioning groups / Trusts to adopt for monitoring of their own elective  
30  
31 318 surgery and capacity. We report the experience of just one trust that is one of the larger elective  
32  
33 319 orthopaedic centres, and hence the findings may not be generalisable to or reflect the experience of  
34  
35 320 other trusts. Our findings are observational and report changes observed at the Trust following  
36  
37 321 cancellation of elective services in winter 2017; further work would be needed to understand the  
38  
39 322 impact of any changes on outcomes such as throughput of patients, waiting times, waiting lists,  
40  
41 323 outcomes of surgery, costs, and equity of access to surgery. We should be aware that some results  
42  
43 324 may reflect chance findings due to multiple testing and type 1 error. The trends in the data as  
44  
45 325 plotted do not change substantially in sensitivity analyses accounting for different autocorrelation  
46  
47 326 lags (Supplementary Tables T3-T4). The catchment area of the Trust is not exactly the same as the  
48  
49 327 major local CCG and is difficult to define exactly. However, 89.4% of admissions at the Trust were for  
50  
51 328 residents of the local CCG and we felt this was a reasonable approximation to estimate the ratio of  
52  
53 329 public to private provision in the Trust catchment area. Our analyses only include NHS-funded  
54  
55 330 surgery and not privately-funded, privately-provided surgery.

1  
2  
3 331 *Comparison to other studies*  
4  
5

6 332 A previous study<sup>23</sup> using data for England from Hospital Episode Statistics found increasing private  
7  
8 333 provision of elective hip arthroplasties nationally from 2007/8 to 2012/13, particularly for less  
9  
10 334 deprived people, which echoes our findings. More recent news stories have suggested that 20% of  
11  
12 335 NHS-funded hip replacements and 29% of NHS-funded knee replacements were carried out by  
13  
14 336 independent providers in 2016/17<sup>24</sup>, and that independently-provided hip and knee replacement  
15  
16 337 surgery (privately or NHS-funded) has now overtaken NHS provision.<sup>25</sup> A UK-wide study<sup>6</sup> using  
17  
18 338 primary care data (CPRD) linked to hospital admissions found similar effects of patient  
19  
20 339 characteristics (age, sex, comorbidity, and deprivation) on length of stay for primary hip and knee  
21  
22 340 replacements, although they did not explore seasonality. A recent qualitative study<sup>26</sup> highlighted the  
23  
24 341 negative financial and emotional impact of winter elective cancellations on patients and their  
25  
26 342 families and recommended better advanced planning of elective operations to reduce these  
27  
28 343 impacts.  
29  
30  
31  
32  
33

34 344 *Implications for clinicians and policy makers*  
35

36 345 Outsourcing of less complex hip and knee replacements to take advantage of spare capacity in non-  
37  
38 346 NHS hospitals may be a good strategy to reduce waiting times and waiting lists for surgery and get  
39  
40 347 the best results for patients given the evident capacity limitations. However, this would leave the  
41  
42 348 NHS Trust to cope with more complex cases and has training implications because trainee surgeons  
43  
44 349 are usually trained by first undertaking less-complex cases on healthier patients. There are also  
45  
46 350 potential equity implications, if less complex cases have the option of surgery with shorter waiting  
47  
48 351 times at independent providers, whilst more complex (and potentially more deprived) cases do not.  
49  
50 352 We would need to consider the acceptability of this outsourcing to patients and practitioners, and  
51  
52 353 the quality of patient outcomes.  
53  
54  
55  
56  
57  
58  
59  
60

1  
2  
3 354 There is an indication that some selection of patients for elective surgery depending on available  
4  
5 355 capacity already takes place at the Trust. It is possible that this could become a more explicit  
6  
7 356 strategy, based on evidence, to optimise the use of limited capacity in hospitals at different times of  
8  
9  
10 357 the year. However, this could mean that people placed earlier on the waiting list for surgery might  
11  
12 358 get their surgery later due to such scheduling strategies, so acceptability to patients would need to  
13  
14 359 be explored. We need to understand how the scheduling and possible outsourcing of elective  
15  
16 360 surgery for different types of patients, depending on capacity, may impact on throughput of  
17  
18 361 patients, waiting times, waiting lists, outcomes of surgery, costs, and equity of access to surgery.  
19  
20  
21 362 Inevitably outsourcing simpler patients to the independent sector will leave more complex patients  
22  
23 363 being treated by NHS Trusts, which could have a detrimental impact on their service. An appropriate  
24  
25 364 balance would need to be achieved to maximise the benefits for patients, and research is needed to  
26  
27 365 understand what that balance is. Additionally, we need to understand whether this type of  
28  
29 366 scheduling and outsourcing is acceptable to people waiting for hip and knee surgery as well as  
30  
31 367 clinicians. These issues of optimising limited elective resources are in even sharper focus due to the  
32  
33 368 backlog in waiting lists caused by the COVID-19 pandemic.  
34  
35  
36  
37  
38

### 369 *Unanswered questions and future research*

39  
40 370 We need to understand how the scheduling and possible outsourcing of elective surgery for  
41  
42 371 different types of patients, depending on capacity, may impact on throughput of patients, waiting  
43  
44 372 times, waiting lists, outcomes of surgery, costs, and equity of access to surgery. Inevitably  
45  
46 373 outsourcing simpler patients to the independent sector will leave more complex patients being  
47  
48 374 treated by NHS Trusts, which could have a detrimental impact on their service. An appropriate  
49  
50 375 balance would need to be achieved to maximise the benefits for patients, and research is needed to  
51  
52 376 understand what that balance is. Additionally, we need to understand whether this type of  
53  
54 377 scheduling and outsourcing is acceptable to people waiting for hip and knee surgery as well as  
55  
56 378 clinicians.  
57  
58  
59  
60

1  
2  
3 379 *Conclusions*  
4  
5

6 380 Declining elective capacity and seasonality has a marked effect on the provision of joint  
7  
8 381 replacement, despite efficiency improvements in hospital treatment. The Trust has outsourced less  
9  
10 382 complex patients to independent providers, and/or treated them during winter when capacity is  
11  
12 383 most limited. There is a need to explore whether these are strategies that could be used explicitly to  
13  
14 384 maximise the use of limited elective capacity, provide benefit to patients, and value for money for  
15  
16 385 taxpayers.  
17  
18  
19

20 386  
21  
22

23 387 **Author Contributions**  
24  
25

26 388 This publication is the work of the authors, who serve as guarantors for the contents of this paper. TJ  
27  
28 389 contributed to study design, data cleaning, data analysis, interpretation of results and writing the  
29  
30 390 manuscript. MTR contributed to study conceptualisation, supervision, interpretation of results and  
31  
32 391 reviewing the manuscript. TK contributed to data curation, supervision, interpretation of results and  
33  
34 392 reviewing the manuscript. AE contributed to data curation, interpretation of results and reviewing  
35  
36 393 the manuscript. CP and EE contributed to interpretation of results and reviewing the manuscript. AB  
37  
38 394 contributed to study conceptualisation, supervision, interpretation of results and reviewing the  
39  
40 395 manuscript. AJ contributed to study conceptualisation and design, supervision, and writing the  
41  
42 396 manuscript. TJ had full access to the data in the study and takes responsibility for the integrity of the  
43  
44 397 data and the accuracy of the data analysis.  
45  
46  
47  
48

49 398  
50  
51

52 399 **Acknowledgements**  
53  
54

55 400 The study reported here would not have been possible without information provided by the NHS  
56  
57 401 Trust, and the use of their hospital admissions data via the NIHR ARC West Partnership Agreement.  
58  
59  
60

1  
2  
3 402  
4  
56 403 **Funding**  
7  
89 404 This research was funded by Health Data Research UK (HDR UK) Better Care South-West Partnership.  
1011 405 EE, TJ, and MTR's time was supported by the National Institute for Health Research Applied Research  
1213 406 Collaboration West (NIHR ARC West). AJ and CP were supported by the NIHR Biomedical Research  
1415 407 Centre at University Hospitals Bristol and Weston NHS Foundation Trust and the University of Bristol.  
1617 408 The views expressed in this article are those of the author(s) and not necessarily those of the NHS,  
1819 409 the NIHR, the Department of Health and Social Care or HDR UK.  
20  
21  
2223 410  
24  
2526 411 **Ethical Approval**  
27  
2829 412 We were provided with pseudonymised hospital admissions data from the NHS Trust under the NIHR  
3031 413 ARC West Partnership Agreement. The project received ethical approval from the University of  
3233 414 Bristol Faculty of Health Sciences ethical review board on 3<sup>rd</sup> November 2020 (ref# 109024).  
34  
3536 415 We were provided with routinely-collected Hospital Episode Statistics data under licence from NHS  
3738 416 Digital (DARS-NIC-17875-X7K1V). The licence allows us to use the information under Section 261 of  
3940 417 the Health and Social Care Act 2012, 2(b)(ii): "after taking into account the public interest as well as  
4142 418 the interests of the relevant person, considers that it is appropriate for the information to be  
4344 419 disseminated".  
45  
46  
4748 420  
49  
5051 421 **Data Sharing**  
52  
5354 422 The data from the NHS Trust was obtained under the NIHR ARC West Partnership Agreement. The  
5556 423 agreement precludes us from sharing the raw data but it can be published and shared once  
5758 424 aggregated to a non-identifiable level.  
59  
60



1  
2  
3 425 The data from Hospital Episode Statistics (HES) was obtained under licence (DARS-NIC-17875-X7K1V)  
4  
5 426 from NHS Digital (previously the Health and Social Care Information Centre); *Copyright © 2022, re-*  
6  
7 427 *used with the permission of The Health & Social Care Information Centre. All rights reserved.* The  
8  
9 428 data are provided by patients and collected by the NHS as part of their care and support. HES data  
10  
11  
12 429 can be accessed via NHS Digital: <https://digital.nhs.uk/services/data-access-request-service-dars>  
13  
14  
15 430

### 18 431 **Transparency**

21 432 The manuscript's guarantor (TJ) affirms that the manuscript is an honest, accurate, and transparent  
22  
23 433 account of the study being reported; that no important aspects of the study have been omitted; and  
24  
25 434 that any discrepancies from the study as originally planned have been explained.  
26  
27  
28 435

### 31 436 **Competing Interests**

34 437 All authors have completed the ICMJE uniform disclosure form at [www.icmje.org/coi\\_disclosure.pdf](http://www.icmje.org/coi_disclosure.pdf)  
35  
36 438 and declare: TJ, EE, and TR had financial support from NIHR ARC West for the submitted work; AJ has  
37  
38 439 had financial support in the previous three years through institutional grants from NIHR, HDR UK,  
40  
41 440 Versus Arthritis, Healthcare Quality Improvement Partnership (HQIP), Royal College of Physicians  
42  
43 441 (RCP), and Health Foundation, had unpaid committee or leadership roles relating to musculoskeletal  
44  
45 442 conditions for NIHR, Nuffield Foundation, Warwick CTU, and Versus Arthritis, and a paid expert panel  
46  
47 443 role for Nuffield Foundation Oliver Bird Fund; no other financial relationships with any organisations  
48  
49 444 that might have an interest in the submitted work in the previous three years; no other relationships  
50  
51 445 or activities that could appear to have influenced the submitted work.  
52  
53  
54 446

### 56 448 **REFERENCES**

58 449  
59 450 1. Carr AJ, Robertsson O, Graves S, et al. Knee replacement. *Lancet* 2012;379(9823):1331-40. doi:  
60 451 10.1016/S0140-6736(11)60752-6

1  
2  
3  
4  
5  
6  
7  
8  
9  
10  
11  
12  
13  
14  
15  
16  
17  
18  
19  
20  
21  
22  
23  
24  
25  
26  
27  
28  
29  
30  
31  
32  
33  
34  
35  
36  
37  
38  
39  
40  
41  
42  
43  
44  
45  
46  
47  
48  
49  
50  
51  
52  
53  
54  
55  
56  
57  
58  
59  
60

- 452 2. Pivec R, Johnson AJ, Mears SC, et al. Hip arthroplasty. *Lancet* 2012;380(9855):1768-77. doi:  
453 10.1016/S0140-6736(12)60607-2
- 454 3. Price AJ, Alvand A, Troelsen A, et al. Hip and knee replacement 2 Knee replacement. *Lancet*  
455 2018;392(10158):1672-82. doi: Doi 10.1016/S0140-6736(18)32344-4
- 456 4. Ferguson RJ, Palmer AJ, Taylor A, et al. Hip replacement. *Lancet* 2018;392(10158):1662-71. doi:  
457 10.1016/S0140-6736(18)31777-X [published Online First: 2018/11/30]
- 458 5. Culliford DJ, Maskell J, Beard DJ, et al. Temporal trends in hip and knee replacement in the United  
459 Kingdom 1991 TO 2006. *J Bone Joint Surg Br* 2010;92b(1):130-35. doi: 10.1302/0301-  
460 620x.92b1.22654
- 461 6. Burn E, Edwards CJ, Murray DW, et al. Trends and determinants of length of stay and hospital  
462 reimbursement following knee and hip replacement: evidence from linked primary care and  
463 NHS hospital records from 1997 to 2014. *Bmj Open* 2018;8(1) doi: 10.1136/bmjopen-2017-  
464 019146
- 465 7. Kehlet H. Fast-track hip and knee arthroplasty. *Lancet* 2013;381(9878):1600-02. doi: Doi  
466 10.1016/S0140-6736(13)61003-X
- 467 8. Briggs T. A national review of adult elective orthopaedic services in England 2015. Available from:  
468 [https://gettingitrightfirsttime.co.uk/wp-content/uploads/2017/06/GIRFT-National-Report-](https://gettingitrightfirsttime.co.uk/wp-content/uploads/2017/06/GIRFT-National-Report-Mar15-Web.pdf)  
469 [Mar15-Web.pdf](https://gettingitrightfirsttime.co.uk/wp-content/uploads/2017/06/GIRFT-National-Report-Mar15-Web.pdf).
- 470 9. Ward D, Wenzel L. A new trend in elective hip surgery 2019. Available from:  
471 <https://www.kingsfund.org.uk/blog/2019/06/new-trend-elective-hip-surgery>.
- 472 10. Fisher E, Merry L. Winter 2017/18: the worst ever for the NHS? 2018. Available from:  
473 <https://www.nuffieldtrust.org.uk/news-item/winter-2017-18-the-worst-ever-for-the-nhs>.
- 474 11. BMJ. Covid-19: "Life on hold" for NHS patients needing musculoskeletal care 2021. Available  
475 from: <https://doi.org/10.1136/bmj.n1616>.
- 476 12. Bernal JL, Cummins S, Gasparrini A. Interrupted time series regression for the evaluation of  
477 public health interventions: a tutorial. *Int J Epidemiol* 2017;46(1):348-55. doi:  
478 10.1093/ije/dyw098
- 479 13. Kontopantelis E, Doran T, Springate DA, et al. Regression based quasi-experimental approach  
480 when randomisation is not an option: interrupted time series analysis. *Bmj-Brit Med J*  
481 2015;350 doi: 10.1136/bmj.h2750
- 482 14. Leatherdale ST. Natural experiment methodology for research: a review of how different  
483 methods can support real-world research. *Int J Soc Res Method* 2019;22(1):19-35. doi:  
484 10.1080/13645579.2018.1488449
- 485 15. Benchimol EI, Smeeth L, Guttman A, et al. The REporting of studies Conducted using  
486 Observational Routinely-collected health Data (RECORD) Statement. *Plos Med* 2015;12(10)  
487 doi: 10.1371/journal.pmed.1001885
- 488 16. Herbert A, Wijlaars L, Zylbersztejn A, et al. Data Resource Profile: Hospital Episode Statistics  
489 Admitted Patient Care (HES APC). *Int J Epidemiol* 2017;46(4):1093-+. doi: 10.1093/ije/dyx015
- 490 17. Quan H, Sundararajan V, Halfon P, et al. Coding algorithms for defining comorbidities in ICD-9-  
491 CM and ICD-10 administrative data. *Med Care* 2005;43(11):1130-9. doi:  
492 10.1097/01.mlr.0000182534.19832.83 [published Online First: 2005/10/15]
- 493 18. Office for National Statistics. LSOA (2011) to Clinical Commissioning Groups to Sustainability and  
494 Transformation Partnerships (April 2021) Lookup in England 2021. Available from:  
495 [https://geoportal.statistics.gov.uk/datasets/ons::lsoa-2011-to-clinical-commissioning-](https://geoportal.statistics.gov.uk/datasets/ons::lsoa-2011-to-clinical-commissioning-groups-to-sustainability-and-transformation-partnerships-april-2021-lookup-in-england/explore)  
496 [groups-to-sustainability-and-transformation-partnerships-april-2021-lookup-in-](https://geoportal.statistics.gov.uk/datasets/ons::lsoa-2011-to-clinical-commissioning-groups-to-sustainability-and-transformation-partnerships-april-2021-lookup-in-england/explore)  
497 [england/explore](https://geoportal.statistics.gov.uk/datasets/ons::lsoa-2011-to-clinical-commissioning-groups-to-sustainability-and-transformation-partnerships-april-2021-lookup-in-england/explore).
- 498 19. Bhaskaran K, Gasparrini A, Hajat S, et al. Time series regression studies in environmental  
499 epidemiology. *Int J Epidemiol* 2013;42(4):1187-95. doi: 10.1093/ije/dyt092
- 500 20. Bottomley C, Scott JAG, Isham V. Analysing Interrupted Time Series with a Control. *Epidemiologic*  
501 *Methods* 2019;8(1) doi: 10.1515/em-2018-0010

- 1  
2  
3 502 21. Linden A. Combining synthetic controls and interrupted time series analysis to improve causal  
4 503 inference in program evaluation. *J Eval Clin Pract* 2018;24(2):447-53. doi: 10.1111/jep.12882  
5 504  
6 505 22. Dorward J, Khubone T, Gate K, et al. The impact of the COVID-19 lockdown on HIV care in 65  
7 506 South African primary care clinics: an interrupted time series analysis. *Lancet HIV*  
8 507 2021;8(3):e158-e65. doi: 10.1016/S2352-3018(20)30359-3  
9 508  
10 509 23. Sutaria S, Kirkwood G, Pollock AM. An ecological study of NHS funded elective hip arthroplasties  
11 510 in England from 2003/04 to 2012/13. *J Roy Soc Med* 2019;112(7):292-303. doi:  
12 511 10.1177/0141076819851701  
13 512  
14 513 24. The Independent. NHS privatisation fears after figures show third of knee replacements done by  
15 514 private sector 2018. Available from: [https://www.independent.co.uk/news/uk/home-  
17 516 news/nhs-knee-hip-replacements-private-sector-a8549006.html](https://www.independent.co.uk/news/uk/home-<br/>16 515 news/nhs-knee-hip-replacements-private-sector-a8549006.html).  
18 517  
19 518 25. Dench J. Private hospital overtakes NHS for hip and knee replacement 2021. Available from:  
20 519 [https://londonnewstime.com/private-hospital-overtakes-nhs-for-hip-and-knee-  
22 521 replacement/479438/](https://londonnewstime.com/private-hospital-overtakes-nhs-for-hip-and-knee-<br/>21 520 replacement/479438/).  
23 522  
24 523 26. Herrod PJJ, Adiamah A, Boyd-Carson H, et al. Winter cancellations of elective surgical procedures  
25 524 in the UK: a questionnaire survey of patients on the economic and psychological impact. *Bmj*  
26 525 *Open* 2019;9(9) doi: 10.1136/bmjopen-2018-028753  
27  
28  
29  
30  
31  
32  
33  
34  
35  
36  
37  
38  
39  
40  
41  
42  
43  
44  
45  
46  
47  
48  
49  
50  
51  
52  
53  
54  
55  
56  
57  
58  
59  
60

**FIGURE CAPTIONS**

Figure 1. Elective hip (left panel) and knee (right panel) replacement admissions at the Trust  
Note: grey area shows the winter 2017 cancellations and is excluded from the analysis

Figure 2. Average age on admission for hip (left panel) and knee (right panel) replacements at the Trust  
Note: grey area shows the winter 2017 cancellations and is excluded from the analysis

Figure 3. Proportion of people having hip (left panel) and knee (right panel) replacements with 2+ Charlson comorbidities recorded  
Note: grey area shows the winter 2017 cancellations and is excluded from the analysis

Figure 4. Ratio of public to private provision of elective hip (left panel) and knee (right panel) replacements for NHS patients in the Trust CCG  
Note: grey area shows the winter 2017 cancellations and is excluded from the analysis

Figure 5. Bed occupancy for hip (left panel) and knee (right panel) replacements at the Trust  
Note: grey area shows the winter 2017 cancellations and is excluded from the analysis



Figure 1. Elective hip (left panel) and knee (right panel) replacement admissions at the Trust  
 Note: grey area shows the winter 2017 cancellations and is excluded from the analysis

301x150mm (300 x 300 DPI)

1  
2  
3  
4  
5  
6  
7  
8  
9  
10  
11  
12  
13  
14  
15  
16  
17  
18  
19  
20  
21  
22  
23  
24  
25  
26  
27  
28  
29  
30  
31  
32  
33  
34  
35  
36  
37  
38  
39  
40  
41  
42  
43  
44  
45  
46  
47  
48  
49  
50  
51  
52  
53  
54  
55  
56  
57  
58  
59  
60

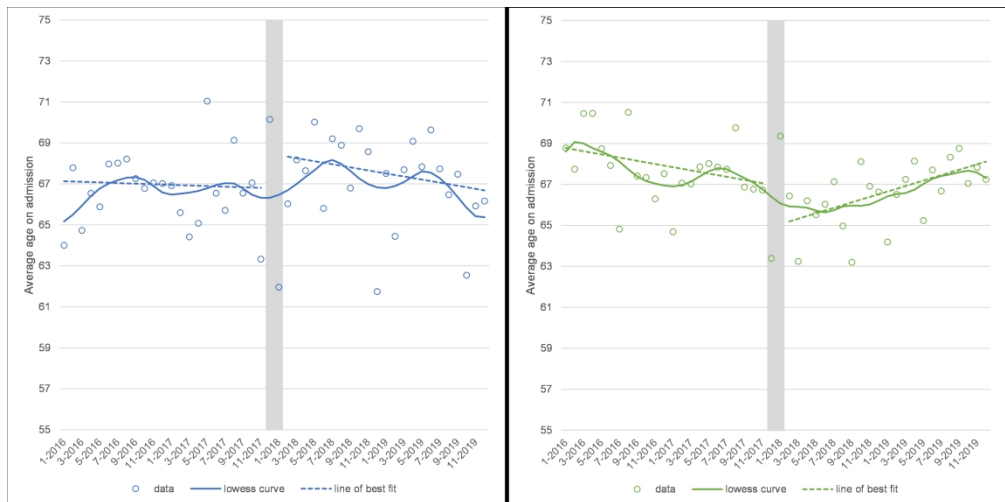

Figure 2. Average age on admission for hip (left panel) and knee (right panel) replacements at the Trust  
Note: grey area shows the winter 2017 cancellations and is excluded from the analysis

301x150mm (300 x 300 DPI)

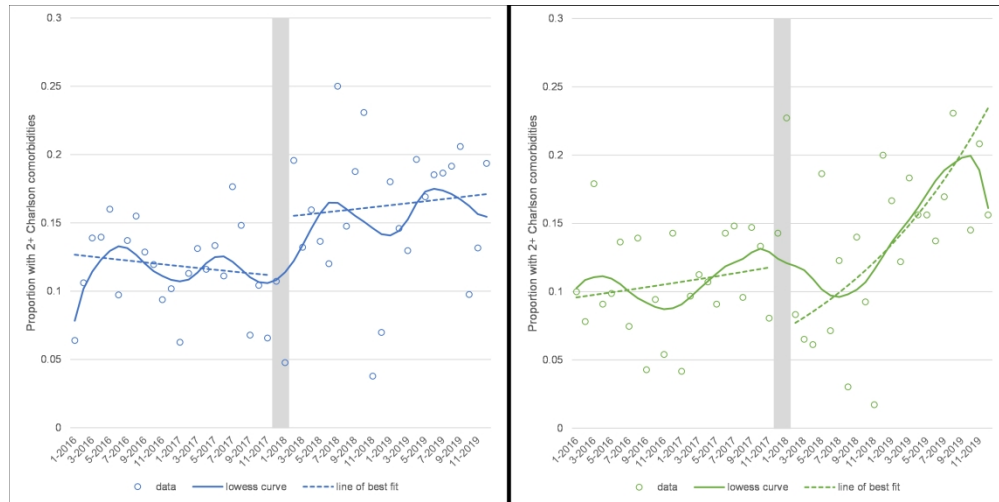

Figure 3. Proportion of people having hip (left panel) and knee (right panel) replacements with 2+ Charlson comorbidities recorded  
 Note: grey area shows the winter 2017 cancellations and is excluded from the analysis

301x150mm (300 x 300 DPI)

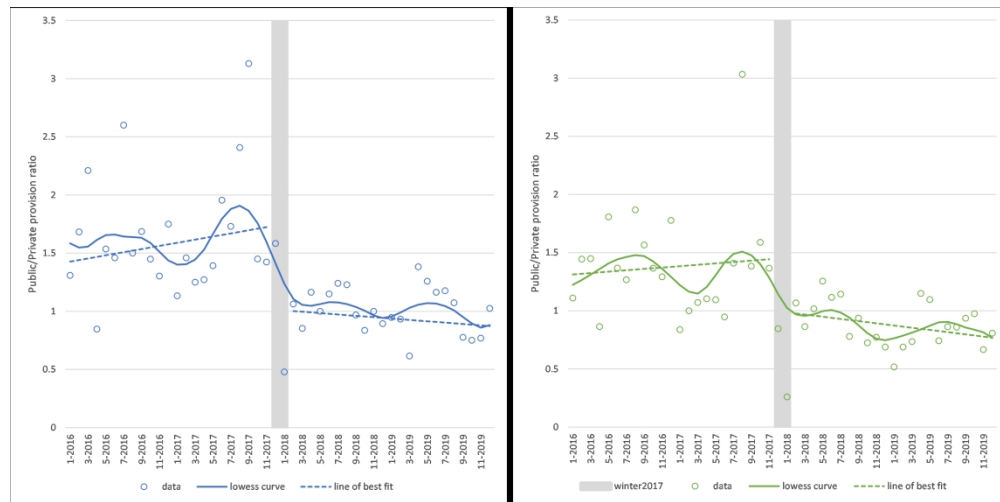

Figure 4. Ratio of public to private provision of elective hip (left panel) and knee (right panel) replacements for NHS patients in the Trust CCG  
 Note: grey area shows the winter 2017 cancellations and is excluded from the analysis

301x150mm (300 x 300 DPI)





Figure 5. Bed occupancy for hip (left panel) and knee (right panel) replacements at the Trust  
 Note: grey area shows the winter 2017 cancellations and is excluded from the analysis

301x150mm (300 x 300 DPI)

Supplementary Figure F1. Ratio of elective to emergency hospital admissions for any reason at the Trust

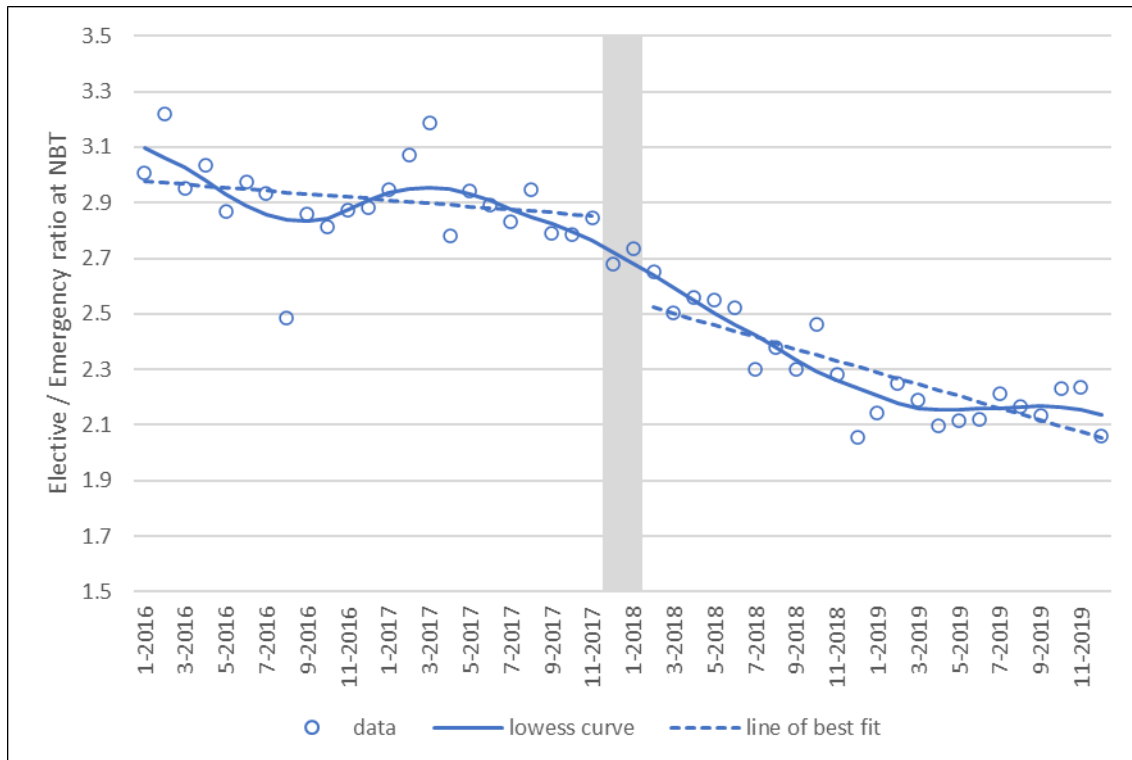

Note: grey area shows the winter 2017 cancellations and is excluded from the analysis

Supplementary Figure F2. Average length of stay for primary hip (left) and knee (right) replacement operations at NBT

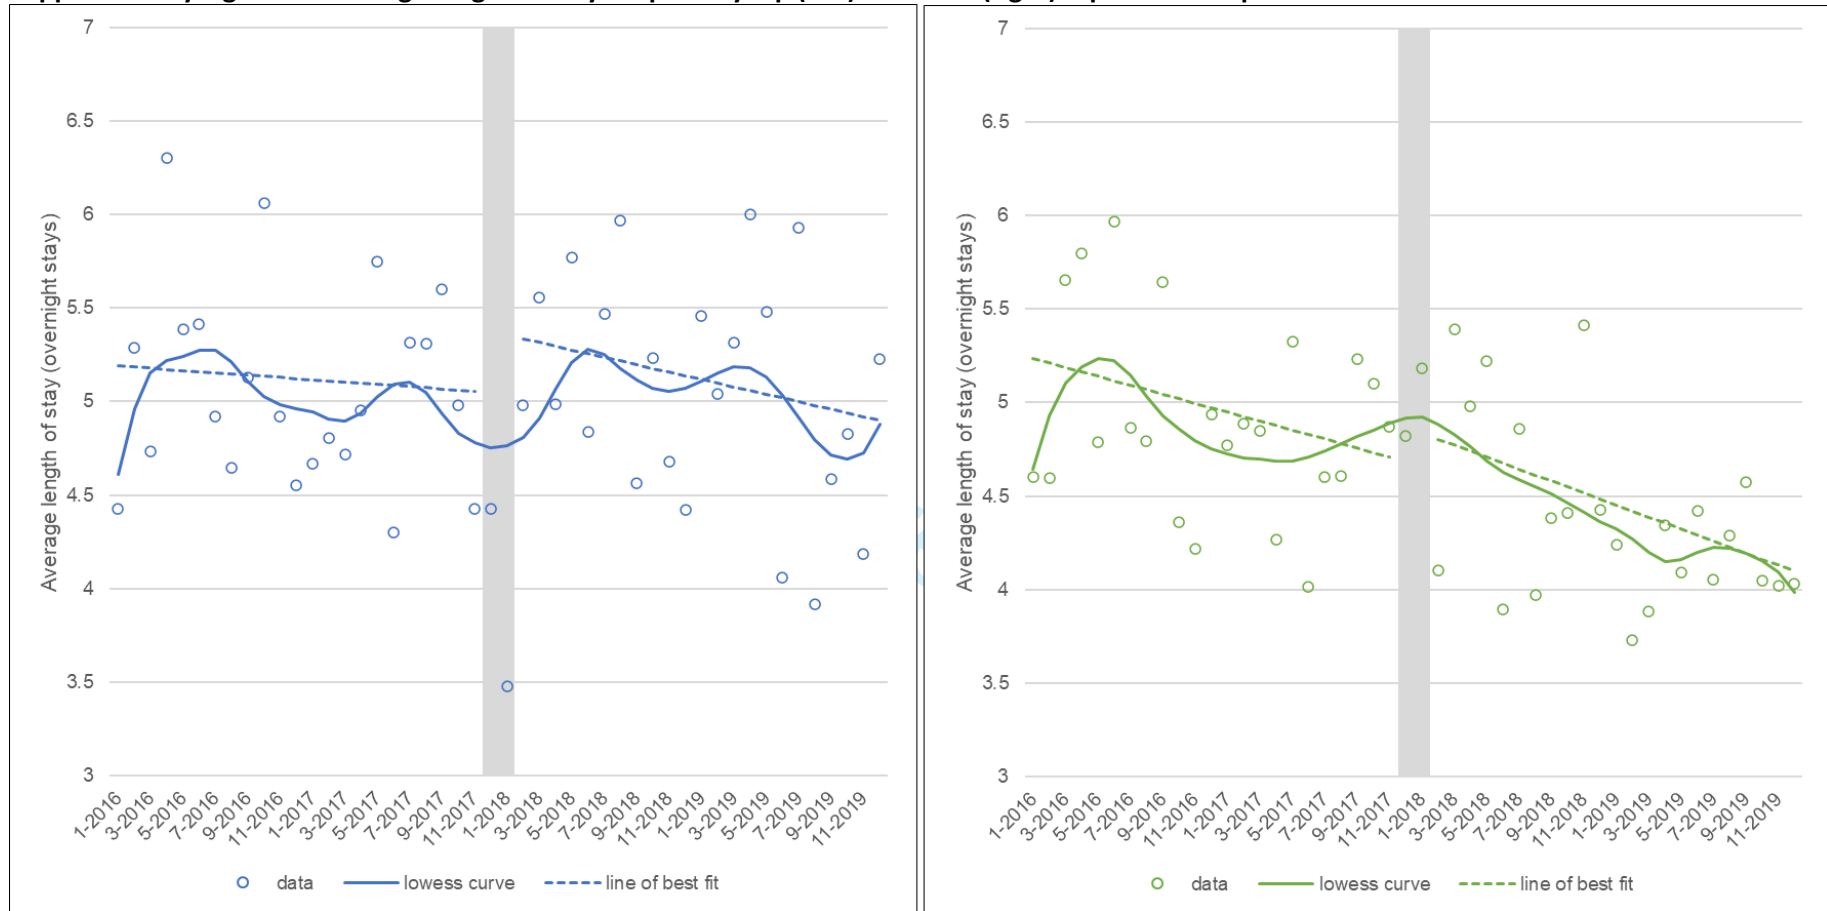

Note: grey area shows the winter 2017 cancellations and is excluded from the analysis

1  
2  
3  
4  
5  
6  
7  
8  
9  
10  
11  
12  
13  
14  
15  
16  
17  
18  
19  
20  
21  
22  
23  
24  
25  
26  
27  
28  
29  
30  
31  
32  
33  
34  
35  
36  
37  
38  
39  
40  
41  
42  
43  
44  
45  
46

For peer review only

**Supplementary Table T1. OPCS-4 codes used to identify primary hip and knee replacement operations**

| <b>Category</b>                      | <b>Code</b>                                                             | <b>Description</b>                                                               | <b>Notes</b> |
|--------------------------------------|-------------------------------------------------------------------------|----------------------------------------------------------------------------------|--------------|
| <i>Primary Total Hip Replacement</i> | W37.1                                                                   | Primary total prosthetic replacement of hip joint using cement                   |              |
|                                      | W37.8                                                                   | Other specified total prosthetic replacement of hip joint using cement           |              |
|                                      | W37.9                                                                   | Unspecified total prosthetic replacement of hip joint using cement               |              |
|                                      | W38.1                                                                   | Primary total prosthetic replacement of hip joint not using cement               |              |
|                                      | W38.8                                                                   | Other specified total prosthetic replacement of hip joint not using cement       |              |
|                                      | W38.9                                                                   | Unspecified total prosthetic replacement of hip joint not using cement           |              |
|                                      | W39.1                                                                   | Primary total prosthetic replacement of hip joint NEC                            |              |
|                                      | W39.8                                                                   | Other specified other total prosthetic replacement of hip joint                  |              |
|                                      | W39.9                                                                   | Unspecified other total prosthetic replacement of hip joint                      |              |
|                                      | W43.1                                                                   | Primary total prosthetic replacement of other joint using cement NEC             |              |
|                                      | W43.8                                                                   | Other specified total prosthetic replacement of other joint using cement NEC     |              |
|                                      | W43.9                                                                   | Unspecified total prosthetic replacement of other joint using cement NEC         |              |
|                                      | W44.1                                                                   | Primary total prosthetic replacement of other joint not using cement NEC         |              |
|                                      | W44.8                                                                   | Other specified total prosthetic replacement of other joint not using cement NEC |              |
|                                      | W44.9                                                                   | Unspecified total prosthetic replacement of other joint not using cement NEC     |              |
| W45.1                                | Other primary total prosthetic replacement of other joint NEC           |                                                                                  |              |
| W45.8                                | Other specified total prosthetic replacement of other joint NEC         |                                                                                  |              |
| W45.9                                | Unspecified total prosthetic replacement of other joint NEC             |                                                                                  |              |
| W52.1                                | Primary prosthetic replacement of articulation of bone using cement NEC |                                                                                  |              |

- 1  
2  
3 W52.8 Other specified prosthetic replacement of articulation of bone using  
4 cement NEC  
5  
6 W52.9 Unspecified prosthetic replacement of articulation of bone using  
7 cement NEC  
8  
9 W53.1 Primary prosthetic replacement of articulation of bone not using  
10 cement NEC  
11  
12 W53.8 Other specified prosthetic replacement of articulation of bone not  
13 using cement NEC  
14  
15 W53.9 Unspecified prosthetic replacement of articulation of bone not using  
16 cement NEC  
17  
18 W54.1 Primary prosthetic replacement of articulation of bone NEC  
19  
20 W54.8 Other specified prosthetic replacement of articulation of bone NEC  
21  
22 W54.9 Unspecified prosthetic replacement of articulation of bone NEC  
23  
24 W93.1 Primary hybrid prosthetic replacement of hip joint using cemented  
25 acetabular component  
26  
27 W93.8 Other specified hybrid prosthetic replacement of hip joint using  
28 cemented acetabular component  
29  
30 W93.9 Unspecified hybrid prosthetic replacement of hip joint using cemented  
31 acetabular component  
32  
33 W94.1 Primary hybrid prosthetic replacement of hip joint using cemented  
34 femoral component  
35  
36 W94.8 Other specified hybrid prosthetic replacement of hip joint using  
37 cemented femoral component  
38  
39 W94.9 Unspecified hybrid prosthetic replacement of hip joint using cemented  
40 femoral component  
41  
42 W95.1 Primary hybrid prosthetic replacement of hip joint using cement NEC  
43  
44 W95.8 Other specified hybrid prosthetic replacement of hip joint using  
45 cement  
46  
47 W95.9 Unspecified hybrid prosthetic replacement of hip joint using cement
-

|    |                                     |       |                                                                                   |
|----|-------------------------------------|-------|-----------------------------------------------------------------------------------|
| 1  |                                     |       |                                                                                   |
| 2  |                                     |       |                                                                                   |
| 3  | <i>Primary Total Knee</i>           | W40.1 | Primary total prosthetic replacement of knee joint using cement                   |
| 4  | <i>Replacement</i>                  |       |                                                                                   |
| 5  |                                     |       |                                                                                   |
| 6  |                                     | W40.8 | Other specified total prosthetic replacement of knee joint using cement           |
| 7  |                                     |       |                                                                                   |
| 8  |                                     | W40.9 | Unspecified total prosthetic replacement of knee joint using cement               |
| 9  |                                     | W41.1 | Primary total prosthetic replacement of knee joint not using cement               |
| 10 |                                     |       |                                                                                   |
| 11 |                                     | W41.8 | Other specified total prosthetic replacement of knee joint not using cement       |
| 12 |                                     |       |                                                                                   |
| 13 |                                     | W41.9 | Unspecified total prosthetic replacement of knee joint not using cement           |
| 14 |                                     |       |                                                                                   |
| 15 |                                     | W42.1 | Primary total prosthetic replacement of knee joint NEC                            |
| 16 |                                     | W42.8 | Other specified other total prosthetic replacement of knee joint                  |
| 17 |                                     | W42.9 | Unspecified other total prosthetic replacement of knee joint                      |
| 18 |                                     | O18.1 | Primary hybrid prosthetic replacement of knee joint using cement                  |
| 19 |                                     | O18.8 | Other specified hybrid prosthetic replacement of knee joint using cement          |
| 20 |                                     |       |                                                                                   |
| 21 |                                     | O18.9 | Unspecified hybrid prosthetic replacement of knee joint using cement              |
| 22 |                                     |       |                                                                                   |
| 23 | <i>Resurfacing / Reconstruction</i> | W58.1 | Primary resurfacing arthroplasty of joint                                         |
| 24 |                                     |       | Require combination with site + combination codes to ID                           |
| 25 |                                     | W58.8 | Other specified reconstruction of joint                                           |
| 26 |                                     |       | Require combination with site + combination codes to ID                           |
| 27 |                                     |       |                                                                                   |
| 28 |                                     | W58.9 | Unspecified other reconstruction of joint                                         |
| 29 |                                     |       | Require combination with site + combination codes to ID                           |
| 30 |                                     |       |                                                                                   |
| 31 | <i>Primary unicondylar /</i>        | W52.1 | Primary prosthetic replacement of articulation of bone using cement               |
| 32 | <i>unicompartmental knee</i>        |       | Require combination with site + combination codes to ID                           |
| 33 | <i>operations</i>                   | W52.8 | Other specified prosthetic replacement of articulation of other bone using cement |
| 34 |                                     |       | Require combination with site + combination codes to ID                           |
| 35 |                                     |       |                                                                                   |
| 36 |                                     | W52.9 | Unspecified prosthetic replacement of articulation of other bone using cement     |
| 37 |                                     |       | Require combination with site + combination codes to ID                           |
| 38 |                                     |       |                                                                                   |
| 39 |                                     | W53.1 | Primary prosthetic replacement of articulation of bone not using cement NEC       |
| 40 |                                     |       | Require combination with site + combination codes to ID                           |
| 41 |                                     |       |                                                                                   |

1  
2  
3  
4  
5  
6  
7  
8  
9  
10  
11  
12  
13  
14  
15  
16  
17  
18  
19  
20  
21  
22  
23  
24  
25  
26  
27  
28  
29  
30  
31  
32  
33  
34  
35  
36  
37  
38  
39  
40  
41  
42  
43  
44  
45  
46

|       |                                                                                   |                                                         |
|-------|-----------------------------------------------------------------------------------|---------------------------------------------------------|
| W53.9 | Unspecified prosthetic replacement of articulation of other bone not using cement | Require combination with site + combination codes to ID |
| W54.0 | Conversion from previous prosthetic replacement of articulation of bone NEC       | Require combination with site + combination codes to ID |
| W54.1 | Primary prosthetic replacement of articulation of bone NEC                        | Require combination with site + combination codes to ID |
| W54.8 | Other specified other prosthetic replacement of articulation of other bone        | Require combination with site + combination codes to ID |
| W54.9 | Unspecified other prosthetic replacement of articulation of other bone            | Require combination with site + combination codes to ID |

---

For peer review only



Supplementary Table T2. Interrupted time series model results with maximum auto-correlation lag 2

|                            | pre-trend             |       | level change           |       | trend change           |       | spring                |       | summer                 |       | autumn                |       |
|----------------------------|-----------------------|-------|------------------------|-------|------------------------|-------|-----------------------|-------|------------------------|-------|-----------------------|-------|
|                            | estimate (95% CI)     | p     | estimate (95% CI)      | p     | estimate (95% CI)      | p     | estimate (95% CI)     | p     | estimate (95% CI)      | p     | estimate (95% CI)     | p     |
| Hip Admissions             | 0.995 (0.986,1.004)   | 0.300 | 1.055 (0.912,1.221)    | 0.469 | 0.991 (0.977,1.006)    | 0.239 | 1.19 (1.034,1.37)     | 0.015 | 1.207 (1.094,1.332)    | 0.000 | 1.101 (0.982,1.234)   | 0.099 |
| Hip Average Age            | -0.015 (-0.102,0.072) | 0.737 | 1.571 (-0.1,3.242)     | 0.065 | -0.06 (-0.175,0.055)   | 0.307 | 1.52 (-0.07,3.111)    | 0.061 | 2.09 (0.811,3.368)     | 0.001 | 1.031 (-0.598,2.66)   | 0.215 |
| Hip Prop Women             | 0.999 (0.995,1.003)   | 0.582 | 0.966 (0.861,1.083)    | 0.549 | 1.007 (0.999,1.016)    | 0.089 | 1.023 (0.941,1.111)   | 0.596 | 1.088 (1.001,1.183)    | 0.048 | 0.981 (0.888,1.083)   | 0.700 |
| Hip Prop 2+ Charlson       | 0.994 (0.982,1.007)   | 0.380 | 1.411 (1.064,1.873)    | 0.017 | 1.01 (0.994,1.027)     | 0.220 | 1.195 (0.982,1.455)   | 0.075 | 1.306 (1.096,1.557)    | 0.003 | 1.003 (0.788,1.276)   | 0.982 |
| Hip Prop High Deprivation  | 1.003 (0.993,1.013)   | 0.587 | 1.027 (0.869,1.214)    | 0.754 | 1.004 (0.986,1.022)    | 0.660 | 0.937 (0.815,1.076)   | 0.358 | 0.877 (0.752,1.022)    | 0.093 | 0.996 (0.84,1.18)     | 0.963 |
| Hip LoS                    | -0.006 (-0.034,0.021) | 0.660 | 0.312 (-0.193,0.818)   | 0.225 | -0.014 (-0.047,0.02)   | 0.425 | 0.502 (0.214,0.79)    | 0.001 | 0.135 (-0.194,0.463)   | 0.422 | 0.1 (-0.288,0.488)    | 0.613 |
| Hip LoS Age 16-59          | -0.003 (-0.028,0.021) | 0.788 | 0.379 (-0.094,0.851)   | 0.116 | -0.026 (-0.065,0.013)  | 0.190 | 0.223 (-0.156,0.602)  | 0.249 | 0.384 (0.065,0.703)    | 0.018 | 0.219 (-0.183,0.622)  | 0.285 |
| Hip LoS Age 60-69          | -0.004 (-0.034,0.026) | 0.818 | 0.013 (-0.807,0.832)   | 0.976 | 0 (-0.053,0.052)       | 0.988 | 0.107 (-0.44,0.654)   | 0.702 | 0.158 (-0.468,0.783)   | 0.621 | 0.162 (-0.487,0.811)  | 0.625 |
| Hip LoS Age 70-79          | 0.006 (-0.058,0.069)  | 0.862 | -0.753 (-2.003,0.497)  | 0.238 | 0.007 (-0.06,0.073)    | 0.847 | -0.433 (-1.416,0.549) | 0.387 | -0.842 (-1.93,0.246)   | 0.129 | -0.865 (-1.991,0.262) | 0.132 |
| Hip LoS Age 80+            | -0.068 (-0.171,0.036) | 0.199 | 2.109 (0.683,3.535)    | 0.004 | -0.002 (-0.128,0.123)  | 0.971 | 1.506 (0.515,2.497)   | 0.003 | 0.222 (-0.773,1.217)   | 0.662 | 1.003 (-0.229,2.235)  | 0.111 |
| Hip LoS Men                | -0.007 (-0.055,0.041) | 0.776 | 0.347 (-0.583,1.278)   | 0.464 | -0.02 (-0.083,0.043)   | 0.536 | 0.293 (-0.126,0.712)  | 0.170 | 0.289 (-0.196,0.774)   | 0.243 | 0.458 (-0.111,1.026)  | 0.114 |
| Hip LoS Women              | -0.004 (-0.041,0.033) | 0.842 | 0.235 (-0.308,0.778)   | 0.396 | -0.014 (-0.055,0.027)  | 0.505 | 0.693 (0.309,1.077)   | 0.000 | 0.009 (-0.428,0.446)   | 0.966 | -0.203 (-0.728,0.323) | 0.449 |
| Hip LoS Charlson 0         | -0.011 (-0.042,0.019) | 0.469 | 0.297 (-0.288,0.882)   | 0.319 | -0.005 (-0.042,0.031)  | 0.782 | 0.912 (0.549,1.276)   | 0.000 | 0.178 (-0.148,0.503)   | 0.285 | 0.222 (-0.065,0.509)  | 0.129 |
| Hip LoS Charlson 1         | 0.034 (-0.012,0.08)   | 0.146 | 0.238 (-0.709,1.184)   | 0.623 | -0.077 (-0.145,-0.01)  | 0.024 | 0.191 (-0.418,0.801)  | 0.538 | 0.312 (-0.405,1.029)   | 0.393 | 0.014 (-0.578,0.606)  | 0.963 |
| Hip LoS Charlson 2+        | -0.123 (-0.259,0.013) | 0.077 | 0.172 (-2.224,2.569)   | 0.888 | 0.116 (-0.016,0.249)   | 0.085 | -0.789 (-2.141,0.563) | 0.253 | -0.783 (-2.087,0.521)  | 0.239 | 0.188 (-2.051,2.427)  | 0.869 |
| Hip LoS Dep 1              | 0.004 (-0.032,0.04)   | 0.829 | 0.553 (-0.391,1.496)   | 0.251 | -0.017 (-0.068,0.035)  | 0.529 | 0.784 (0.107,1.462)   | 0.023 | 0.42 (-0.024,0.863)    | 0.064 | 0.299 (-0.358,0.956)  | 0.373 |
| Hip LoS Dep 2              | -0.038 (-0.083,0.006) | 0.092 | 0.822 (-0.392,2.035)   | 0.184 | -0.015 (-0.086,0.055)  | 0.670 | 1.509 (0.759,2.258)   | 0.000 | 0.66 (-0.246,1.567)    | 0.154 | 0.589 (-0.417,1.594)  | 0.251 |
| Hip LoS Dep 3              | -0.034 (-0.107,0.038) | 0.353 | 0.617 (-0.897,2.131)   | 0.424 | 0.01 (-0.076,0.095)    | 0.827 | -0.216 (-1.224,0.792) | 0.675 | -0.424 (-1.378,0.53)   | 0.384 | -0.701 (-1.536,0.135) | 0.100 |
| Hip LoS Dep 4              | 0.081 (-0.005,0.166)  | 0.064 | -0.473 (-2.181,1.236)  | 0.588 | -0.112 (-0.215,-0.009) | 0.034 | -0.374 (-1.65,0.903)  | 0.566 | -1.204 (-2.351,-0.057) | 0.040 | -0.491 (-1.918,0.935) | 0.500 |
| Hip LoS Dep 5              | 0.015 (-0.086,0.116)  | 0.773 | -0.72 (-2.059,0.62)    | 0.292 | 0 (-0.098,0.099)       | 0.999 | 0.621 (-0.084,1.327)  | 0.084 | 0.689 (-0.31,1.689)    | 0.176 | 0.816 (-0.784,2.416)  | 0.317 |
| Hip Bed Occ                | 0.997 (0.987,1.008)   | 0.643 | 1 (0.844,1.186)        | 0.997 | 0.987 (0.97,1.005)     | 0.149 | 1.291 (1.11,1.501)    | 0.001 | 1.283 (1.125,1.463)    | 0.000 | 1.146 (0.988,1.328)   | 0.071 |
| Hip Public Private         | 0.013 (-0.015,0.041)  | 0.377 | -0.741 (-1.237,-0.245) | 0.003 | -0.019 (-0.05,0.011)   | 0.218 | -0.008 (-0.212,0.196) | 0.939 | 0.308 (0.154,0.463)    | 0.000 | 0.038 (-0.166,0.241)  | 0.718 |
| Knee Admissions            | 0.995 (0.99,1.001)    | 0.106 | 0.843 (0.728,0.976)    | 0.022 | 1.005 (0.996,1.014)    | 0.256 | 1.308 (1.157,1.479)   | 0.000 | 1.26 (1.138,1.396)     | 0.000 | 1.286 (1.164,1.42)    | 0.000 |
| Knee Average Age           | -0.078 (-0.157,0.001) | 0.054 | -1.632 (-2.988,-0.276) | 0.018 | 0.211 (0.117,0.305)    | 0.000 | 0.926 (-0.112,1.965)  | 0.080 | 0.953 (-0.021,1.927)   | 0.055 | 0.354 (-0.531,1.24)   | 0.433 |
| Knee Prop Women            | 1.004 (0.998,1.01)    | 0.150 | 0.96 (0.85,1.084)      | 0.513 | 0.994 (0.986,1.003)    | 0.193 | 1.037 (0.963,1.117)   | 0.336 | 1.017 (0.924,1.118)    | 0.735 | 1.036 (0.958,1.12)    | 0.375 |
| Knee Prop 2+ Charlson      | 1.009 (0.993,1.026)   | 0.249 | 0.638 (0.455,0.894)    | 0.009 | 1.042 (1.017,1.067)    | 0.001 | 1.156 (0.911,1.467)   | 0.234 | 1.074 (0.849,1.359)    | 0.551 | 0.909 (0.628,1.315)   | 0.612 |
| Knee Prop High Deprivation | 1.005 (0.997,1.013)   | 0.189 | 0.968 (0.786,1.191)    | 0.758 | 0.986 (0.974,0.998)    | 0.021 | 1.224 (1.077,1.39)    | 0.002 | 1.075 (0.942,1.227)    | 0.282 | 1.031 (0.902,1.178)   | 0.656 |
| Knee LoS                   | -0.024 (-0.049,0.001) | 0.058 | 0.176 (-0.279,0.63)    | 0.449 | -0.008 (-0.036,0.02)   | 0.566 | 0.422 (0.073,0.771)   | 0.018 | 0.15 (-0.166,0.467)    | 0.352 | 0.396 (0.015,0.777)   | 0.042 |

1  
2  
3  
4  
5  
6  
7  
8  
9  
10  
11  
12  
13  
14  
15  
16  
17  
18  
19  
20  
21  
22  
23  
24  
25  
26  
27  
28  
29  
30  
31  
32  
33  
34  
35  
36  
37  
38  
39  
40  
41  
42  
43  
44  
45  
46

|                      |                        |       |                        |       |                        |       |                       |       |                       |       |                        |       |
|----------------------|------------------------|-------|------------------------|-------|------------------------|-------|-----------------------|-------|-----------------------|-------|------------------------|-------|
| Knee LoS Age 16-59   | -0.016 (-0.037,0.006)  | 0.151 | 0.403 (-0.045,0.852)   | 0.078 | -0.028 (-0.06,0.005)   | 0.096 | 0.484 (0.13,0.839)    | 0.007 | 0.422 (-0.021,0.866)  | 0.062 | 0.475 (0.19,0.76)      | 0.001 |
| Knee LoS Age 16-59   | 0.007 (-0.028,0.043)   | 0.684 | -0.295 (-1.015,0.426)  | 0.423 | -0.026 (-0.072,0.02)   | 0.262 | 0.069 (-0.46,0.599)   | 0.797 | -0.194 (-0.687,0.3)   | 0.441 | -0.096 (-0.725,0.532)  | 0.764 |
| Knee LoS Age 70-79   | -0.009 (-0.057,0.038)  | 0.705 | 0.77 (0.002,1.538)     | 0.049 | -0.054 (-0.11,0.003)   | 0.061 | -0.086 (-0.715,0.542) | 0.787 | -0.552 (-1.163,0.059) | 0.077 | 0.367 (-0.352,1.085)   | 0.317 |
| Knee LoS Age 80+     | -0.051 (-0.118,0.015)  | 0.131 | -0.562 (-2.298,1.173)  | 0.525 | 0.028 (-0.081,0.137)   | 0.612 | 1.521 (0.03,3.011)    | 0.046 | 1.37 (0.169,2.57)     | 0.025 | 1.361 (0.496,2.227)    | 0.002 |
| Knee LoS Men         | -0.007 (-0.031,0.018)  | 0.581 | 0.096 (-0.405,0.597)   | 0.708 | -0.033 (-0.068,0.002)  | 0.064 | 0.082 (-0.367,0.531)  | 0.720 | 0.157 (-0.262,0.575)  | 0.464 | 0.205 (-0.221,0.631)   | 0.346 |
| Knee LoS Women       | -0.042 (-0.084,0)      | 0.052 | 0.252 (-0.461,0.966)   | 0.488 | 0.017 (-0.029,0.063)   | 0.478 | 0.635 (0.048,1.223)   | 0.034 | 0.15 (-0.397,0.698)   | 0.590 | 0.49 (-0.17,1.151)     | 0.146 |
| Knee LoS Charlson 0  | -0.021 (-0.046,0.004)  | 0.095 | 0.067 (-0.362,0.495)   | 0.760 | -0.011 (-0.045,0.024)  | 0.545 | 0.645 (0.334,0.956)   | 0.000 | 0.193 (-0.111,0.497)  | 0.213 | 0.415 (0.069,0.76)     | 0.019 |
| Knee LoS Charlson 1  | -0.03 (-0.074,0.015)   | 0.191 | 0.47 (-0.391,1.331)    | 0.284 | -0.029 (-0.083,0.025)  | 0.298 | 0.455 (-0.043,0.953)  | 0.073 | 0.324 (-0.297,0.945)  | 0.307 | 1.058 (0.367,1.748)    | 0.003 |
| Knee LoS Charlson 2+ | -0.04 (-0.107,0.028)   | 0.247 | 0.407 (-2.28,3.095)    | 0.766 | -0.022 (-0.196,0.151)  | 0.802 | -0.627 (-1.698,0.443) | 0.251 | -0.949 (-2.342,0.444) | 0.182 | -1.433 (-2.229,-0.637) | 0.000 |
| Knee LoS Dep 1       | -0.009 (-0.06,0.041)   | 0.712 | -0.035 (-0.726,0.656)  | 0.920 | -0.008 (-0.073,0.056)  | 0.800 | 0.257 (-0.47,0.985)   | 0.488 | 0.096 (-0.619,0.811)  | 0.793 | -0.127 (-0.725,0.472)  | 0.678 |
| Knee LoS Dep 2       | -0.019 (-0.06,0.022)   | 0.358 | 0.199 (-0.699,1.097)   | 0.664 | -0.043 (-0.098,0.012)  | 0.124 | 0.018 (-0.776,0.812)  | 0.965 | -0.731 (-1.49,0.029)  | 0.059 | 0.05 (-0.822,0.922)    | 0.911 |
| Knee LoS Dep 3       | 0.014 (-0.036,0.064)   | 0.586 | -0.426 (-1.355,0.503)  | 0.369 | -0.036 (-0.106,0.033)  | 0.302 | 0.976 (0.061,1.892)   | 0.036 | 0.909 (-0.034,1.852)  | 0.059 | 0.547 (-0.217,1.312)   | 0.160 |
| Knee LoS Dep 4       | -0.064 (-0.123,-0.004) | 0.035 | 0.634 (-0.293,1.56)    | 0.180 | 0.033 (-0.039,0.105)   | 0.373 | 0.669 (-0.187,1.525)  | 0.126 | 0.617 (0.02,1.214)    | 0.043 | 0.852 (-0.208,1.912)   | 0.115 |
| Knee LoS Dep 5       | -0.035 (-0.09,0.021)   | 0.224 | 0.709 (-0.303,1.721)   | 0.170 | 0.015 (-0.046,0.076)   | 0.628 | 0.123 (-0.73,0.976)   | 0.778 | -0.387 (-1.281,0.507) | 0.397 | 1.104 (0.077,2.131)    | 0.035 |
| Knee Bed Occ         | 0.993 (0.984,1.002)    | 0.103 | 0.834 (0.704,0.989)    | 0.037 | 1 (0.989,1.011)        | 0.993 | 1.42 (1.297,1.556)    | 0.000 | 1.373 (1.218,1.547)   | 0.000 | 1.465 (1.312,1.635)    | 0.000 |
| Knee Public Private  | 0.006 (-0.02,0.031)    | 0.667 | -0.476 (-1.026,0.074)  | 0.090 | -0.015 (-0.04,0.009)   | 0.225 | 0.113 (-0.089,0.314)  | 0.274 | 0.276 (0.035,0.517)   | 0.025 | 0.131 (-0.071,0.332)   | 0.205 |
| Elec Emerg Ratio     | -0.005 (-0.013,0.002)  | 0.171 | -0.322 (-0.446,-0.198) | 0.000 | -0.016 (-0.026,-0.005) | 0.003 | -0.008 (-0.12,0.103)  | 0.886 | -0.053 (-0.182,0.077) | 0.424 | -0.028 (-0.151,0.096)  | 0.661 |

**Supplementary Table T3. Interrupted time series model results with maximum auto-correlation lag 0**

|                            | pre-trend             |       | level change           |       | trend change          |       | spring                |       | summer                |       | autumn                |       |
|----------------------------|-----------------------|-------|------------------------|-------|-----------------------|-------|-----------------------|-------|-----------------------|-------|-----------------------|-------|
|                            | estimate (95% CI)     | p     | estimate (95% CI)      | p     | estimate (95% CI)     | p     | estimate (95% CI)     | p     | estimate (95% CI)     | p     | estimate (95% CI)     | p     |
| Hip Admissions             | 0.995 (0.985,1.005)   | 0.323 | 1.055 (0.902,1.235)    | 0.503 | 0.991 (0.978,1.005)   | 0.220 | 1.19 (1.036,1.367)    | 0.014 | 1.207 (1.088,1.339)   | 0.000 | 1.101 (0.983,1.234)   | 0.098 |
| Hip Average Age            | -0.015 (-0.134,0.104) | 0.806 | 1.571 (-0.863,4.004)   | 0.206 | -0.06 (-0.208,0.088)  | 0.427 | 1.52 (-0.079,3.119)   | 0.062 | 2.09 (0.685,3.494)    | 0.004 | 1.031 (-0.505,2.567)  | 0.188 |
| Hip Prop Women             | 0.999 (0.993,1.004)   | 0.674 | 0.966 (0.826,1.13)     | 0.662 | 1.007 (0.997,1.017)   | 0.158 | 1.023 (0.937,1.116)   | 0.617 | 1.088 (0.995,1.189)   | 0.064 | 0.981 (0.878,1.096)   | 0.730 |
| Hip Prop 2+ Charlson       | 0.994 (0.98,1.009)    | 0.455 | 1.411 (0.969,2.055)    | 0.072 | 1.01 (0.989,1.031)    | 0.344 | 1.195 (0.971,1.471)   | 0.092 | 1.306 (1.043,1.637)   | 0.020 | 1.003 (0.734,1.37)    | 0.986 |
| Hip Prop High Deprivation  | 1.003 (0.991,1.014)   | 0.631 | 1.027 (0.846,1.247)    | 0.787 | 1.004 (0.983,1.025)   | 0.704 | 0.937 (0.819,1.072)   | 0.342 | 0.877 (0.746,1.03)    | 0.110 | 0.996 (0.831,1.193)   | 0.965 |
| Hip LoS                    | -0.006 (-0.038,0.026) | 0.704 | 0.312 (-0.262,0.887)   | 0.287 | -0.014 (-0.058,0.03)  | 0.542 | 0.502 (0.132,0.872)   | 0.008 | 0.135 (-0.292,0.562)  | 0.537 | 0.1 (-0.287,0.487)    | 0.612 |
| Hip LoS Age 16-59          | -0.003 (-0.033,0.026) | 0.821 | 0.379 (-0.165,0.922)   | 0.172 | -0.026 (-0.067,0.015) | 0.210 | 0.223 (-0.17,0.617)   | 0.266 | 0.384 (0.053,0.715)   | 0.023 | 0.219 (-0.168,0.607)  | 0.267 |
| Hip LoS Age 60-69          | -0.004 (-0.046,0.039) | 0.871 | 0.013 (-1.026,1.052)   | 0.981 | 0 (-0.069,0.068)      | 0.990 | 0.107 (-0.592,0.805)  | 0.765 | 0.158 (-0.514,0.829)  | 0.645 | 0.162 (-0.588,0.912)  | 0.672 |
| Hip LoS Age 70-79          | 0.006 (-0.067,0.078)  | 0.879 | -0.753 (-2.031,0.525)  | 0.248 | 0.007 (-0.069,0.082)  | 0.865 | -0.433 (-1.583,0.716) | 0.460 | -0.842 (-2.028,0.344) | 0.164 | -0.865 (-2.164,0.435) | 0.192 |
| Hip LoS Age 80+            | -0.068 (-0.193,0.058) | 0.291 | 2.109 (0.536,3.682)    | 0.009 | -0.002 (-0.16,0.155)  | 0.977 | 1.506 (-0.007,3.018)  | 0.051 | 0.222 (-1.036,1.48)   | 0.729 | 1.003 (-0.375,2.38)   | 0.154 |
| Hip LoS Men                | -0.007 (-0.056,0.042) | 0.783 | 0.347 (-0.58,1.275)    | 0.463 | -0.02 (-0.084,0.044)  | 0.543 | 0.293 (-0.283,0.87)   | 0.319 | 0.289 (-0.314,0.892)  | 0.347 | 0.458 (-0.15,1.066)   | 0.140 |
| Hip LoS Women              | -0.004 (-0.048,0.041) | 0.868 | 0.235 (-0.563,1.033)   | 0.564 | -0.014 (-0.071,0.043) | 0.634 | 0.693 (0.164,1.222)   | 0.010 | 0.009 (-0.543,0.562)  | 0.973 | -0.203 (-0.727,0.322) | 0.448 |
| Hip LoS Charlson 0         | -0.011 (-0.047,0.024) | 0.532 | 0.297 (-0.428,1.023)   | 0.422 | -0.005 (-0.049,0.039) | 0.817 | 0.912 (0.522,1.302)   | 0.000 | 0.178 (-0.232,0.587)  | 0.396 | 0.222 (-0.135,0.579)  | 0.223 |
| Hip LoS Charlson 1         | 0.034 (-0.023,0.091)  | 0.240 | 0.238 (-0.704,1.179)   | 0.621 | -0.077 (-0.157,0.002) | 0.056 | 0.191 (-0.562,0.945)  | 0.619 | 0.312 (-0.397,1.022)  | 0.388 | 0.014 (-0.544,0.572)  | 0.960 |
| Hip LoS Charlson 2+        | -0.123 (-0.266,0.02)  | 0.092 | 0.172 (-2.155,2.5)     | 0.885 | 0.116 (-0.04,0.273)   | 0.144 | -0.789 (-2.218,0.64)  | 0.279 | -0.783 (-2.108,0.541) | 0.246 | 0.188 (-1.779,2.156)  | 0.851 |
| Hip LoS Dep 1              | 0.004 (-0.039,0.047)  | 0.857 | 0.553 (-0.509,1.614)   | 0.307 | -0.017 (-0.078,0.045) | 0.599 | 0.784 (0.118,1.451)   | 0.021 | 0.42 (-0.084,0.923)   | 0.102 | 0.299 (-0.356,0.954)  | 0.371 |
| Hip LoS Dep 2              | -0.038 (-0.087,0.01)  | 0.124 | 0.822 (-0.528,2.172)   | 0.233 | -0.015 (-0.103,0.072) | 0.730 | 1.509 (0.797,2.22)    | 0.000 | 0.66 (-0.225,1.546)   | 0.144 | 0.589 (-0.26,1.437)   | 0.174 |
| Hip LoS Dep 3              | -0.034 (-0.096,0.027) | 0.275 | 0.617 (-1.066,2.3)     | 0.472 | 0.01 (-0.09,0.109)    | 0.851 | -0.216 (-1.343,0.912) | 0.708 | -0.424 (-1.475,0.627) | 0.429 | -0.701 (-1.667,0.266) | 0.155 |
| Hip LoS Dep 4              | 0.081 (-0.023,0.185)  | 0.129 | -0.473 (-2.643,1.698)  | 0.670 | -0.112 (-0.258,0.034) | 0.134 | -0.374 (-1.695,0.947) | 0.579 | -1.204 (-2.409,0.001) | 0.050 | -0.491 (-1.978,0.995) | 0.517 |
| Hip LoS Dep 5              | 0.015 (-0.112,0.142)  | 0.819 | -0.72 (-2.66,1.221)    | 0.467 | 0 (-0.135,0.135)      | 0.999 | 0.621 (-0.412,1.655)  | 0.239 | 0.689 (-0.485,1.864)  | 0.250 | 0.816 (-0.891,2.524)  | 0.349 |
| Hip Bed Occ                | 0.997 (0.987,1.009)   | 0.653 | 1 (0.824,1.215)        | 0.997 | 0.987 (0.972,1.002)   | 0.097 | 1.291 (1.125,1.48)    | 0.000 | 1.283 (1.129,1.458)   | 0.000 | 1.146 (0.984,1.334)   | 0.080 |
| Hip Public Private         | 0.013 (-0.015,0.041)  | 0.377 | -0.741 (-1.237,-0.245) | 0.003 | -0.019 (-0.05,0.011)  | 0.218 | -0.008 (-0.212,0.196) | 0.939 | 0.308 (0.154,0.463)   | 0.000 | 0.038 (-0.166,0.241)  | 0.718 |
| Knee Admissions            | 0.995 (0.987,1.004)   | 0.274 | 0.843 (0.702,1.013)    | 0.068 | 1.005 (0.993,1.017)   | 0.422 | 1.308 (1.154,1.483)   | 0.000 | 1.26 (1.114,1.426)    | 0.000 | 1.286 (1.147,1.441)   | 0.000 |
| Knee Average Age           | -0.078 (-0.157,0.001) | 0.053 | -1.632 (-3.299,0.035)  | 0.055 | 0.211 (0.102,0.32)    | 0.000 | 0.926 (-0.129,1.981)  | 0.085 | 0.953 (-0.257,2.163)  | 0.123 | 0.354 (-0.777,1.485)  | 0.540 |
| Knee Prop Women            | 1.004 (0.998,1.011)   | 0.182 | 0.96 (0.84,1.097)      | 0.551 | 0.994 (0.986,1.003)   | 0.184 | 1.037 (0.939,1.146)   | 0.474 | 1.017 (0.908,1.138)   | 0.776 | 1.036 (0.928,1.157)   | 0.529 |
| Knee Prop 2+ Charlson      | 1.009 (0.988,1.031)   | 0.384 | 0.638 (0.392,1.037)    | 0.070 | 1.042 (1.008,1.077)   | 0.015 | 1.156 (0.891,1.501)   | 0.276 | 1.074 (0.829,1.393)   | 0.589 | 0.909 (0.636,1.299)   | 0.600 |
| Knee Prop High Deprivation | 1.005 (0.997,1.014)   | 0.237 | 0.968 (0.784,1.195)    | 0.761 | 0.986 (0.974,0.998)   | 0.023 | 1.224 (1.099,1.363)   | 0.000 | 1.075 (0.956,1.209)   | 0.225 | 1.031 (0.911,1.166)   | 0.631 |
| Knee LoS                   | -0.024 (-0.052,0.004) | 0.089 | 0.176 (-0.352,0.703)   | 0.515 | -0.008 (-0.041,0.025) | 0.625 | 0.422 (0.117,0.726)   | 0.007 | 0.15 (-0.174,0.475)   | 0.364 | 0.396 (0.027,0.765)   | 0.036 |

1  
2  
3  
4  
5  
6  
7  
8  
9  
10  
11  
12  
13  
14  
15  
16  
17  
18  
19  
20  
21  
22  
23  
24  
25  
26  
27  
28  
29  
30  
31  
32  
33  
34  
35  
36  
37  
38  
39  
40  
41  
42  
43  
44  
45  
46

|                      |                       |       |                        |       |                        |       |                       |       |                       |       |                        |       |
|----------------------|-----------------------|-------|------------------------|-------|------------------------|-------|-----------------------|-------|-----------------------|-------|------------------------|-------|
| Knee LoS Age 16-59   | -0.016 (-0.048,0.017) | 0.352 | 0.403 (-0.286,1.093)   | 0.252 | -0.028 (-0.074,0.019)  | 0.246 | 0.484 (0.111,0.857)   | 0.011 | 0.422 (-0.111,0.956)  | 0.121 | 0.475 (0.056,0.893)    | 0.026 |
| Knee LoS Age 16-59   | 0.007 (-0.026,0.041)  | 0.664 | -0.295 (-1.22,0.63)    | 0.532 | -0.026 (-0.085,0.033)  | 0.384 | 0.069 (-0.465,0.604)  | 0.799 | -0.194 (-0.754,0.366) | 0.497 | -0.096 (-0.673,0.48)   | 0.743 |
| Knee LoS Age 70-79   | -0.009 (-0.072,0.054) | 0.775 | 0.77 (-0.267,1.807)    | 0.145 | -0.054 (-0.128,0.02)   | 0.154 | -0.086 (-0.782,0.609) | 0.808 | -0.552 (-1.267,0.163) | 0.130 | 0.367 (-0.528,1.261)   | 0.421 |
| Knee LoS Age 80+     | -0.051 (-0.154,0.051) | 0.327 | -0.562 (-2.568,1.443)  | 0.583 | 0.028 (-0.105,0.161)   | 0.678 | 1.521 (-0.076,3.118)  | 0.062 | 1.37 (-0.178,2.918)   | 0.083 | 1.361 (-0.071,2.794)   | 0.063 |
| Knee LoS Men         | -0.007 (-0.037,0.023) | 0.656 | 0.096 (-0.512,0.704)   | 0.758 | -0.033 (-0.075,0.009)  | 0.121 | 0.082 (-0.382,0.547)  | 0.729 | 0.157 (-0.272,0.585)  | 0.474 | 0.205 (-0.265,0.675)   | 0.392 |
| Knee LoS Women       | -0.042 (-0.088,0.004) | 0.071 | 0.252 (-0.495,1)       | 0.508 | 0.017 (-0.036,0.07)    | 0.536 | 0.635 (0.107,1.164)   | 0.019 | 0.15 (-0.365,0.666)   | 0.567 | 0.49 (-0.022,1.003)    | 0.061 |
| Knee LoS Charlson 0  | -0.021 (-0.054,0.012) | 0.214 | 0.067 (-0.49,0.624)    | 0.814 | -0.011 (-0.056,0.034)  | 0.643 | 0.645 (0.278,1.013)   | 0.001 | 0.193 (-0.146,0.533)  | 0.265 | 0.415 (-0.078,0.907)   | 0.099 |
| Knee LoS Charlson 1  | -0.03 (-0.081,0.022)  | 0.260 | 0.47 (-0.741,1.681)    | 0.447 | -0.029 (-0.093,0.036)  | 0.384 | 0.455 (-0.111,1.021)  | 0.115 | 0.324 (-0.426,1.074)  | 0.398 | 1.058 (0.262,1.854)    | 0.009 |
| Knee LoS Charlson 2+ | -0.04 (-0.111,0.032)  | 0.276 | 0.407 (-2.137,2.951)   | 0.754 | -0.022 (-0.184,0.14)   | 0.788 | -0.627 (-1.883,0.628) | 0.327 | -0.949 (-2.145,0.247) | 0.120 | -1.433 (-2.278,-0.589) | 0.001 |
| Knee LoS Dep 1       | -0.009 (-0.064,0.045) | 0.733 | -0.035 (-0.918,0.847)  | 0.937 | -0.008 (-0.082,0.066)  | 0.826 | 0.257 (-0.443,0.958)  | 0.471 | 0.096 (-0.699,0.89)   | 0.813 | -0.127 (-0.786,0.532)  | 0.706 |
| Knee LoS Dep 2       | -0.019 (-0.065,0.026) | 0.413 | 0.199 (-1.031,1.429)   | 0.751 | -0.043 (-0.116,0.031)  | 0.253 | 0.018 (-0.822,0.858)  | 0.967 | -0.731 (-1.538,0.077) | 0.076 | 0.05 (-0.819,0.919)    | 0.910 |
| Knee LoS Dep 3       | 0.014 (-0.05,0.078)   | 0.670 | -0.426 (-1.892,1.04)   | 0.569 | -0.036 (-0.116,0.043)  | 0.369 | 0.976 (-0.09,2.043)   | 0.073 | 0.909 (-0.134,1.952)  | 0.088 | 0.547 (-0.408,1.503)   | 0.261 |
| Knee LoS Dep 4       | -0.064 (-0.143,0.015) | 0.113 | 0.634 (-0.591,1.858)   | 0.310 | 0.033 (-0.057,0.123)   | 0.474 | 0.669 (-0.193,1.531)  | 0.128 | 0.617 (-0.032,1.266)  | 0.063 | 0.852 (-0.138,1.842)   | 0.092 |
| Knee LoS Dep 5       | -0.035 (-0.116,0.047) | 0.405 | 0.709 (-0.701,2.119)   | 0.324 | 0.015 (-0.076,0.106)   | 0.745 | 0.123 (-0.882,1.128)  | 0.810 | -0.387 (-1.379,0.606) | 0.445 | 1.104 (-0.268,2.476)   | 0.115 |
| Knee Bed Occ         | 0.993 (0.984,1.001)   | 0.074 | 0.834 (0.711,0.979)    | 0.027 | 1 (0.989,1.011)        | 0.993 | 1.42 (1.269,1.59)     | 0.000 | 1.373 (1.217,1.548)   | 0.000 | 1.465 (1.287,1.667)    | 0.000 |
| Knee Public Private  | 0.006 (-0.02,0.031)   | 0.667 | -0.476 (-1.026,0.074)  | 0.090 | -0.015 (-0.04,0.009)   | 0.225 | 0.113 (-0.089,0.314)  | 0.274 | 0.276 (0.035,0.517)   | 0.025 | 0.131 (-0.071,0.332)   | 0.205 |
| Elec Emerg Ratio     | -0.005 (-0.013,0.002) | 0.167 | -0.322 (-0.451,-0.192) | 0.000 | -0.016 (-0.025,-0.006) | 0.001 | -0.008 (-0.117,0.101) | 0.884 | -0.053 (-0.174,0.068) | 0.392 | -0.028 (-0.128,0.073)  | 0.591 |

**Supplementary Table T4. Interrupted time series model results with maximum auto-correlation lag 5**

|                            | pre-trend              |       | level change           |       | trend change           |       | spring                |       | summer                 |       | autumn                |       |
|----------------------------|------------------------|-------|------------------------|-------|------------------------|-------|-----------------------|-------|------------------------|-------|-----------------------|-------|
|                            | estimate (95% CI)      | p     | estimate (95% CI)      | p     | estimate (95% CI)      | p     | estimate (95% CI)     | p     | estimate (95% CI)      | p     | estimate (95% CI)     | p     |
| Hip Admissions             | 0.995 (0.987,1.003)    | 0.249 | 1.055 (0.917,1.215)    | 0.454 | 0.991 (0.978,1.005)    | 0.217 | 1.19 (1.04,1.362)     | 0.012 | 1.207 (1.104,1.32)     | 0.000 | 1.101 (0.993,1.221)   | 0.069 |
| Hip Average Age            | -0.015 (-0.094,0.065)  | 0.714 | 1.571 (0.241,2.901)    | 0.021 | -0.06 (-0.168,0.048)   | 0.277 | 1.52 (-0.178,3.218)   | 0.079 | 2.09 (0.818,3.361)     | 0.001 | 1.031 (-0.639,2.701)  | 0.226 |
| Hip Prop Women             | 0.999 (0.995,1.002)    | 0.503 | 0.966 (0.895,1.042)    | 0.367 | 1.007 (1.001,1.014)    | 0.027 | 1.023 (0.932,1.122)   | 0.636 | 1.088 (1,1.184)        | 0.051 | 0.981 (0.879,1.094)   | 0.727 |
| Hip Prop 2+ Charlson       | 0.994 (0.985,1.004)    | 0.261 | 1.411 (1.116,1.785)    | 0.004 | 1.01 (1,1.02)          | 0.042 | 1.195 (0.979,1.459)   | 0.079 | 1.306 (1.111,1.535)    | 0.001 | 1.003 (0.792,1.27)    | 0.981 |
| Hip Prop High Deprivation  | 1.003 (0.994,1.012)    | 0.551 | 1.027 (0.883,1.195)    | 0.729 | 1.004 (0.99,1.018)     | 0.577 | 0.937 (0.805,1.091)   | 0.400 | 0.877 (0.752,1.022)    | 0.092 | 0.996 (0.847,1.171)   | 0.961 |
| Hip LoS                    | -0.006 (-0.029,0.017)  | 0.605 | 0.312 (-0.12,0.745)    | 0.157 | -0.014 (-0.042,0.015)  | 0.346 | 0.502 (0.286,0.718)   | 0.000 | 0.135 (-0.191,0.461)   | 0.418 | 0.1 (-0.332,0.532)    | 0.650 |
| Hip LoS Age 16-59          | -0.003 (-0.026,0.02)   | 0.773 | 0.379 (-0.046,0.803)   | 0.080 | -0.026 (-0.062,0.01)   | 0.152 | 0.223 (-0.113,0.559)  | 0.193 | 0.384 (0.09,0.679)     | 0.011 | 0.219 (-0.191,0.63)   | 0.295 |
| Hip LoS Age 60-69          | -0.004 (-0.031,0.024)  | 0.799 | 0.013 (-0.766,0.791)   | 0.975 | 0 (-0.051,0.05)        | 0.987 | 0.107 (-0.33,0.543)   | 0.632 | 0.158 (-0.451,0.766)   | 0.611 | 0.162 (-0.352,0.676)  | 0.537 |
| Hip LoS Age 70-79          | 0.006 (-0.054,0.065)   | 0.853 | -0.753 (-1.944,0.438)  | 0.215 | 0.007 (-0.056,0.069)   | 0.836 | -0.433 (-1.343,0.476) | 0.350 | -0.842 (-1.91,0.226)   | 0.122 | -0.865 (-2.063,0.334) | 0.157 |
| Hip LoS Age 80+            | -0.068 (-0.147,0.012)  | 0.097 | 2.109 (0.803,3.414)    | 0.002 | -0.002 (-0.111,0.107)  | 0.967 | 1.506 (0.499,2.513)   | 0.003 | 0.222 (-0.799,1.243)   | 0.670 | 1.003 (-0.111,2.116)  | 0.078 |
| Hip LoS Men                | -0.007 (-0.047,0.033)  | 0.732 | 0.347 (-0.44,1.135)    | 0.387 | -0.02 (-0.073,0.033)   | 0.458 | 0.293 (-0.117,0.704)  | 0.161 | 0.289 (-0.193,0.771)   | 0.239 | 0.458 (-0.163,1.079)  | 0.149 |
| Hip LoS Women              | -0.004 (-0.035,0.028)  | 0.816 | 0.235 (-0.271,0.741)   | 0.362 | -0.014 (-0.046,0.018)  | 0.391 | 0.693 (0.395,0.991)   | 0.000 | 0.009 (-0.421,0.439)   | 0.966 | -0.203 (-0.762,0.357) | 0.477 |
| Hip LoS Charlson 0         | -0.011 (-0.039,0.016)  | 0.418 | 0.297 (-0.242,0.837)   | 0.280 | -0.005 (-0.035,0.025)  | 0.738 | 0.912 (0.617,1.208)   | 0.000 | 0.178 (-0.123,0.478)   | 0.247 | 0.222 (-0.066,0.51)   | 0.131 |
| Hip LoS Charlson 1         | 0.034 (0.003,0.065)    | 0.030 | 0.238 (-0.604,1.08)    | 0.580 | -0.077 (-0.137,-0.018) | 0.011 | 0.191 (-0.385,0.767)  | 0.515 | 0.312 (-0.431,1.056)   | 0.410 | 0.014 (-0.563,0.591)  | 0.962 |
| Hip LoS Charlson 2+        | -0.123 (-0.239,-0.007) | 0.038 | 0.172 (-1.97,2.314)    | 0.875 | 0.116 (0.005,0.228)    | 0.040 | -0.789 (-2.189,0.611) | 0.269 | -0.783 (-2.119,0.553)  | 0.250 | 0.188 (-2.176,2.552)  | 0.876 |
| Hip LoS Dep 1              | 0.004 (-0.029,0.037)   | 0.814 | 0.553 (-0.303,1.408)   | 0.206 | -0.017 (-0.065,0.032)  | 0.501 | 0.784 (0.131,1.437)   | 0.019 | 0.42 (-0.034,0.874)    | 0.070 | 0.299 (-0.401,0.999)  | 0.402 |
| Hip LoS Dep 2              | -0.038 (-0.083,0.006)  | 0.092 | 0.822 (-0.167,1.81)    | 0.103 | -0.015 (-0.078,0.047)  | 0.630 | 1.509 (0.737,2.28)    | 0.000 | 0.66 (-0.202,1.522)    | 0.133 | 0.589 (-0.461,1.638)  | 0.272 |
| Hip LoS Dep 3              | -0.034 (-0.102,0.033)  | 0.319 | 0.617 (-0.789,2.023)   | 0.390 | 0.01 (-0.072,0.091)    | 0.819 | -0.216 (-1.011,0.579) | 0.595 | -0.424 (-1.293,0.445)  | 0.339 | -0.701 (-1.351,-0.05) | 0.035 |
| Hip LoS Dep 4              | 0.081 (0.017,0.144)    | 0.013 | -0.473 (-1.858,0.913)  | 0.504 | -0.112 (-0.189,-0.035) | 0.004 | -0.374 (-1.59,0.842)  | 0.547 | -1.204 (-2.355,-0.053) | 0.040 | -0.491 (-1.989,1.007) | 0.520 |
| Hip LoS Dep 5              | 0.015 (-0.056,0.085)   | 0.682 | -0.72 (-1.647,0.208)   | 0.128 | 0 (-0.07,0.07)         | 0.998 | 0.621 (-0.104,1.347)  | 0.093 | 0.689 (-0.25,1.629)    | 0.150 | 0.816 (-0.696,2.329)  | 0.290 |
| Hip Bed Occ                | 0.997 (0.987,1.008)    | 0.627 | 1 (0.862,1.161)        | 0.996 | 0.987 (0.97,1.004)     | 0.128 | 1.291 (1.116,1.492)   | 0.001 | 1.283 (1.14,1.444)     | 0.000 | 1.146 (0.99,1.326)    | 0.068 |
| Hip Public Private         | 0.013 (-0.015,0.041)   | 0.377 | -0.741 (-1.237,-0.245) | 0.003 | -0.019 (-0.05,0.011)   | 0.218 | -0.008 (-0.212,0.196) | 0.939 | 0.308 (0.154,0.463)    | 0.000 | 0.038 (-0.166,0.241)  | 0.718 |
| Knee Admissions            | 0.995 (0.992,0.999)    | 0.016 | 0.843 (0.761,0.934)    | 0.001 | 1.005 (0.998,1.012)    | 0.170 | 1.308 (1.154,1.482)   | 0.000 | 1.26 (1.16,1.369)      | 0.000 | 1.286 (1.178,1.403)   | 0.000 |
| Knee Average Age           | -0.078 (-0.152,-0.005) | 0.037 | -1.632 (-2.825,-0.439) | 0.007 | 0.211 (0.128,0.293)    | 0.000 | 0.926 (-0.072,1.924)  | 0.069 | 0.953 (0.077,1.829)    | 0.033 | 0.354 (-0.422,1.13)   | 0.371 |
| Knee Prop Women            | 1.004 (0.999,1.009)    | 0.086 | 0.96 (0.861,1.071)     | 0.465 | 0.994 (0.987,1.001)    | 0.097 | 1.037 (0.973,1.105)   | 0.260 | 1.017 (0.922,1.121)    | 0.743 | 1.036 (0.966,1.111)   | 0.319 |
| Knee Prop 2+ Charlson      | 1.009 (0.993,1.026)    | 0.250 | 0.638 (0.468,0.869)    | 0.004 | 1.042 (1.021,1.064)    | 0.000 | 1.156 (0.931,1.436)   | 0.190 | 1.074 (0.841,1.372)    | 0.567 | 0.909 (0.626,1.321)   | 0.617 |
| Knee Prop High Deprivation | 1.005 (0.999,1.011)    | 0.107 | 0.968 (0.835,1.122)    | 0.664 | 0.986 (0.977,0.995)    | 0.003 | 1.224 (1.082,1.384)   | 0.001 | 1.075 (0.95,1.217)     | 0.251 | 1.031 (0.924,1.149)   | 0.586 |
| Knee LoS                   | -0.024 (-0.047,-0.001) | 0.042 | 0.176 (-0.2,0.551)     | 0.360 | -0.008 (-0.031,0.015)  | 0.490 | 0.422 (0.033,0.81)    | 0.033 | 0.15 (-0.199,0.499)    | 0.398 | 0.396 (-0.011,0.803)  | 0.057 |

1  
2  
3  
4  
5  
6  
7  
8  
9  
10  
11  
12  
13  
14  
15  
16  
17  
18  
19  
20  
21  
22  
23  
24  
25  
26  
27  
28  
29  
30  
31  
32  
33  
34  
35  
36  
37  
38  
39  
40  
41  
42  
43  
44  
45  
46

|                      |                        |       |                        |       |                        |       |                       |       |                       |       |                        |       |
|----------------------|------------------------|-------|------------------------|-------|------------------------|-------|-----------------------|-------|-----------------------|-------|------------------------|-------|
| Knee LoS Age 16-59   | -0.016 (-0.032,0.001)  | 0.068 | 0.403 (0.008,0.799)    | 0.046 | -0.028 (-0.059,0.003)  | 0.081 | 0.484 (0.198,0.77)    | 0.001 | 0.422 (-0.01,0.855)   | 0.056 | 0.475 (0.216,0.734)    | 0.000 |
| Knee LoS Age 16-59   | 0.007 (-0.018,0.033)   | 0.571 | -0.295 (-0.854,0.265)  | 0.302 | -0.026 (-0.062,0.009)  | 0.147 | 0.069 (-0.455,0.593)  | 0.795 | -0.194 (-0.652,0.265) | 0.407 | -0.096 (-0.713,0.52)   | 0.759 |
| Knee LoS Age 70-79   | -0.009 (-0.045,0.027)  | 0.616 | 0.77 (0.101,1.439)     | 0.024 | -0.054 (-0.096,-0.012) | 0.012 | -0.086 (-0.736,0.563) | 0.794 | -0.552 (-1.116,0.012) | 0.055 | 0.367 (-0.3,1.034)     | 0.281 |
| Knee LoS Age 80+     | -0.051 (-0.097,-0.006) | 0.026 | -0.562 (-1.849,0.724)  | 0.391 | 0.028 (-0.062,0.119)   | 0.541 | 1.521 (0.119,2.923)   | 0.034 | 1.37 (0.391,2.349)    | 0.006 | 1.361 (0.617,2.106)    | 0.000 |
| Knee LoS Men         | -0.007 (-0.028,0.014)  | 0.514 | 0.096 (-0.297,0.488)   | 0.633 | -0.033 (-0.062,-0.004) | 0.024 | 0.082 (-0.416,0.58)   | 0.746 | 0.157 (-0.244,0.558)  | 0.444 | 0.205 (-0.149,0.559)   | 0.256 |
| Knee LoS Women       | -0.042 (-0.079,-0.005) | 0.027 | 0.252 (-0.356,0.861)   | 0.416 | 0.017 (-0.018,0.052)   | 0.350 | 0.635 (-0.036,1.307)  | 0.064 | 0.15 (-0.454,0.754)   | 0.625 | 0.49 (-0.258,1.239)    | 0.199 |
| Knee LoS Charlson 0  | -0.021 (-0.044,0.002)  | 0.077 | 0.067 (-0.312,0.446)   | 0.730 | -0.011 (-0.036,0.015)  | 0.419 | 0.645 (0.331,0.959)   | 0.000 | 0.193 (-0.129,0.516)  | 0.240 | 0.415 (0.075,0.754)    | 0.017 |
| Knee LoS Charlson 1  | -0.03 (-0.064,0.005)   | 0.092 | 0.47 (-0.199,1.139)    | 0.169 | -0.029 (-0.067,0.01)   | 0.145 | 0.455 (-0.097,1.007)  | 0.106 | 0.324 (-0.341,0.988)  | 0.340 | 1.058 (0.384,1.731)    | 0.002 |
| Knee LoS Charlson 2+ | -0.04 (-0.092,0.012)   | 0.134 | 0.407 (-1.956,2.771)   | 0.736 | -0.022 (-0.184,0.14)   | 0.789 | -0.627 (-1.625,0.37)  | 0.218 | -0.949 (-2.374,0.476) | 0.192 | -1.433 (-2.175,-0.691) | 0.000 |
| Knee LoS Dep 1       | -0.009 (-0.05,0.031)   | 0.644 | -0.035 (-0.656,0.586)  | 0.911 | -0.008 (-0.059,0.043)  | 0.750 | 0.257 (-0.541,1.056)  | 0.527 | 0.096 (-0.581,0.772)  | 0.782 | -0.127 (-0.724,0.47)   | 0.677 |
| Knee LoS Dep 2       | -0.019 (-0.055,0.017)  | 0.300 | 0.199 (-0.57,0.968)    | 0.612 | -0.043 (-0.086,0)      | 0.049 | 0.018 (-0.731,0.767)  | 0.962 | -0.731 (-1.507,0.046) | 0.065 | 0.05 (-0.887,0.987)    | 0.917 |
| Knee LoS Dep 3       | 0.014 (-0.031,0.059)   | 0.544 | -0.426 (-1.102,0.25)   | 0.217 | -0.036 (-0.095,0.022)  | 0.220 | 0.976 (0.281,1.672)   | 0.006 | 0.909 (-0.067,1.886)  | 0.068 | 0.547 (-0.12,1.215)    | 0.108 |
| Knee LoS Dep 4       | -0.064 (-0.127,-0.001) | 0.047 | 0.634 (-0.165,1.432)   | 0.120 | 0.033 (-0.04,0.106)    | 0.380 | 0.669 (-0.076,1.414)  | 0.079 | 0.617 (0.007,1.227)   | 0.047 | 0.852 (-0.274,1.978)   | 0.138 |
| Knee LoS Dep 5       | -0.035 (-0.087,0.018)  | 0.194 | 0.709 (-0.225,1.643)   | 0.137 | 0.015 (-0.042,0.072)   | 0.606 | 0.123 (-0.701,0.947)  | 0.770 | -0.387 (-1.304,0.531) | 0.409 | 1.104 (0.188,2.02)     | 0.018 |
| Knee Bed Occ         | 0.993 (0.986,0.999)    | 0.032 | 0.834 (0.728,0.956)    | 0.009 | 1 (0.991,1.009)        | 0.991 | 1.42 (1.308,1.542)    | 0.000 | 1.373 (1.213,1.553)   | 0.000 | 1.465 (1.318,1.627)    | 0.000 |
| Knee Public Private  | 0.006 (-0.02,0.031)    | 0.667 | -0.476 (-1.026,0.074)  | 0.090 | -0.015 (-0.04,0.009)   | 0.225 | 0.113 (-0.089,0.314)  | 0.274 | 0.276 (0.035,0.517)   | 0.025 | 0.131 (-0.071,0.332)   | 0.205 |
| Elec Emerg Ratio     | -0.005 (-0.013,0.003)  | 0.198 | -0.322 (-0.455,-0.189) | 0.000 | -0.016 (-0.026,-0.005) | 0.004 | -0.008 (-0.107,0.091) | 0.872 | -0.053 (-0.18,0.074)  | 0.414 | -0.028 (-0.163,0.108)  | 0.690 |

**The RECORD statement – checklist of items, extended from the STROBE statement, that should be reported in observational studies using routinely collected health data.**

|                           | Item No. | STROBE items                                                                                                                                                                               | Location in manuscript where items are reported | RECORD items                                                                                                                                                                                                                                                                                                                                                                                                                                | Location in manuscript where items are reported |
|---------------------------|----------|--------------------------------------------------------------------------------------------------------------------------------------------------------------------------------------------|-------------------------------------------------|---------------------------------------------------------------------------------------------------------------------------------------------------------------------------------------------------------------------------------------------------------------------------------------------------------------------------------------------------------------------------------------------------------------------------------------------|-------------------------------------------------|
| <b>Title and abstract</b> |          |                                                                                                                                                                                            |                                                 |                                                                                                                                                                                                                                                                                                                                                                                                                                             |                                                 |
|                           | 1        | (a) Indicate the study's design with a commonly used term in the title or the abstract (b) Provide in the abstract an informative and balanced summary of what was done and what was found |                                                 | RECORD 1.1: The type of data used should be specified in the title or abstract. When possible, the name of the databases used should be included.<br><br>RECORD 1.2: If applicable, the geographic region and timeframe within which the study took place should be reported in the title or abstract.<br><br>RECORD 1.3: If linkage between databases was conducted for the study, this should be clearly stated in the title or abstract. | Abstract P2 L35-37<br><br>Abstract P2 L35-38    |
| <b>Introduction</b>       |          |                                                                                                                                                                                            |                                                 |                                                                                                                                                                                                                                                                                                                                                                                                                                             |                                                 |
| Background rationale      | 2        | Explain the scientific background and rationale for the investigation being reported                                                                                                       |                                                 |                                                                                                                                                                                                                                                                                                                                                                                                                                             | Introduction P4-5 L76-113                       |
| Objectives                | 3        | State specific objectives, including any prespecified hypotheses                                                                                                                           |                                                 |                                                                                                                                                                                                                                                                                                                                                                                                                                             | Introduction P5 L107-113                        |
| <b>Methods</b>            |          |                                                                                                                                                                                            |                                                 |                                                                                                                                                                                                                                                                                                                                                                                                                                             |                                                 |
| Study Design              | 4        | Present key elements of study design early in the paper                                                                                                                                    |                                                 |                                                                                                                                                                                                                                                                                                                                                                                                                                             | Methods P5 L116-119                             |
| Setting                   | 5        | Describe the setting, locations, and relevant dates, including periods of recruitment, exposure, follow-up, and data collection                                                            |                                                 |                                                                                                                                                                                                                                                                                                                                                                                                                                             | Methods P5 L116-119<br>Methods P7-8 L70-176     |

|                                                                                                                                                                                                            |          |                                                                                                                                                                                                                                                                                                                                                                                                                                                                                                                                                                                                                                                                                                                        |  |                                                                                                                                                                                                                                                                                                                                                                                                                                                                                                                                                                                                                                                                                                      |                                                               |
|------------------------------------------------------------------------------------------------------------------------------------------------------------------------------------------------------------|----------|------------------------------------------------------------------------------------------------------------------------------------------------------------------------------------------------------------------------------------------------------------------------------------------------------------------------------------------------------------------------------------------------------------------------------------------------------------------------------------------------------------------------------------------------------------------------------------------------------------------------------------------------------------------------------------------------------------------------|--|------------------------------------------------------------------------------------------------------------------------------------------------------------------------------------------------------------------------------------------------------------------------------------------------------------------------------------------------------------------------------------------------------------------------------------------------------------------------------------------------------------------------------------------------------------------------------------------------------------------------------------------------------------------------------------------------------|---------------------------------------------------------------|
| <p>1<br/>2<br/>3<br/>4<br/>5<br/>6<br/>7<br/>8<br/>9<br/>10<br/>11<br/>12<br/>13<br/>14<br/>15<br/>16<br/>17<br/>18<br/>19<br/>20<br/>21<br/>22<br/>23<br/>24<br/>25<br/>26<br/>27</p> <p>Participants</p> | <p>6</p> | <p>(a) <i>Cohort study</i> - Give the eligibility criteria, and the sources and methods of selection of participants. Describe methods of follow-up<br/> <i>Case-control study</i> - Give the eligibility criteria, and the sources and methods of case ascertainment and control selection. Give the rationale for the choice of cases and controls<br/> <i>Cross-sectional study</i> - Give the eligibility criteria, and the sources and methods of selection of participants</p> <p>(b) <i>Cohort study</i> - For matched studies, give matching criteria and number of exposed and unexposed<br/> <i>Case-control study</i> - For matched studies, give matching criteria and the number of controls per case</p> |  | <p>RECORD 6.1: The methods of study population selection (such as codes or algorithms used to identify subjects) should be listed in detail. If this is not possible, an explanation should be provided.</p> <p>RECORD 6.2: Any validation studies of the codes or algorithms used to select the population should be referenced. If validation was conducted for this study and not published elsewhere, detailed methods and results should be provided.</p> <p>RECORD 6.3: If the study involved linkage of databases, consider use of a flow diagram or other graphical display to demonstrate the data linkage process, including the number of individuals with linked data at each stage.</p> | <p>Methods P6<br/>L141-147<br/>Supplementary<br/>Table T1</p> |
| <p>28<br/>29<br/>30<br/>31<br/>32<br/>33<br/>34</p> <p>Variables</p>                                                                                                                                       | <p>7</p> | <p>Clearly define all outcomes, exposures, predictors, potential confounders, and effect modifiers. Give diagnostic criteria, if applicable.</p>                                                                                                                                                                                                                                                                                                                                                                                                                                                                                                                                                                       |  | <p>RECORD 7.1: A complete list of codes and algorithms used to classify exposures, outcomes, confounders, and effect modifiers should be provided. If these cannot be reported, an explanation should be provided.</p>                                                                                                                                                                                                                                                                                                                                                                                                                                                                               | <p>Methods P6-7<br/>L141-169</p>                              |
| <p>35<br/>36<br/>37<br/>38<br/>39<br/>40<br/>41<br/>42</p> <p>Data sources/<br/>measurement</p>                                                                                                            | <p>8</p> | <p>For each variable of interest, give sources of data and details of methods of assessment (measurement). Describe comparability of assessment methods if there is more than one group</p>                                                                                                                                                                                                                                                                                                                                                                                                                                                                                                                            |  |                                                                                                                                                                                                                                                                                                                                                                                                                                                                                                                                                                                                                                                                                                      | <p>Methods P5-6<br/>L120-140</p>                              |



|                                                                                                                                              |                                  |    |                                                                                                                                                                                                                                                                                                                                                                                                                                                                                                                                                                      |  |                                                                                                                                                       |                              |
|----------------------------------------------------------------------------------------------------------------------------------------------|----------------------------------|----|----------------------------------------------------------------------------------------------------------------------------------------------------------------------------------------------------------------------------------------------------------------------------------------------------------------------------------------------------------------------------------------------------------------------------------------------------------------------------------------------------------------------------------------------------------------------|--|-------------------------------------------------------------------------------------------------------------------------------------------------------|------------------------------|
| 1<br>2<br>3<br>4<br>5<br>6<br>7<br>8<br>9<br>10                                                                                              | Bias                             | 9  | Describe any efforts to address potential sources of bias                                                                                                                                                                                                                                                                                                                                                                                                                                                                                                            |  |                                                                                                                                                       | Methods P7-8<br>L170-185,    |
| 11<br>12<br>13<br>14<br>15<br>16<br>17<br>18<br>19<br>20<br>21<br>22<br>23<br>24<br>25<br>26<br>27<br>28<br>29<br>30<br>31<br>32<br>33<br>34 | Study size                       | 10 | Explain how the study size was arrived at                                                                                                                                                                                                                                                                                                                                                                                                                                                                                                                            |  |                                                                                                                                                       | Methods P6<br>L141-147       |
| 35<br>36<br>37<br>38<br>39<br>40<br>41<br>42<br>43<br>44<br>45<br>46<br>47                                                                   | Quantitative variables           | 11 | Explain how quantitative variables were handled in the analyses. If applicable, describe which groupings were chosen, and why                                                                                                                                                                                                                                                                                                                                                                                                                                        |  |                                                                                                                                                       | Methods P6-7<br>L141-169     |
|                                                                                                                                              | Statistical methods              | 12 | (a) Describe all statistical methods, including those used to control for confounding<br>(b) Describe any methods used to examine subgroups and interactions<br>(c) Explain how missing data were addressed<br>(d) <i>Cohort study</i> - If applicable, explain how loss to follow-up was addressed<br><i>Case-control study</i> - If applicable, explain how matching of cases and controls was addressed<br><i>Cross-sectional study</i> - If applicable, describe analytical methods taking account of sampling strategy<br>(e) Describe any sensitivity analyses |  |                                                                                                                                                       | Methods P7-8<br>L170-185     |
|                                                                                                                                              | Data access and cleaning methods |    | ..                                                                                                                                                                                                                                                                                                                                                                                                                                                                                                                                                                   |  | RECORD 12.1: Authors should describe the extent to which the investigators had access to the database population used to create the study population. | Data Sharing P17<br>L392-400 |

|                  |    |                                                                                                                                                                                                                                                                                                                                                 |  |                                                                                                                                                                                                                                                                                                                    |                                                   |
|------------------|----|-------------------------------------------------------------------------------------------------------------------------------------------------------------------------------------------------------------------------------------------------------------------------------------------------------------------------------------------------|--|--------------------------------------------------------------------------------------------------------------------------------------------------------------------------------------------------------------------------------------------------------------------------------------------------------------------|---------------------------------------------------|
|                  |    |                                                                                                                                                                                                                                                                                                                                                 |  | RECORD 12.2: Authors should provide information on the data cleaning methods used in the study.                                                                                                                                                                                                                    | Methods P6-7<br>L141-169                          |
| Linkage          |    | ..                                                                                                                                                                                                                                                                                                                                              |  | RECORD 12.3: State whether the study included person-level, institutional-level, or other data linkage across two or more databases. The methods of linkage and methods of linkage quality evaluation should be provided.                                                                                          | N/A                                               |
| <b>Results</b>   |    |                                                                                                                                                                                                                                                                                                                                                 |  |                                                                                                                                                                                                                                                                                                                    |                                                   |
| Participants     | 13 | (a) Report the numbers of individuals at each stage of the study ( <i>e.g.</i> , numbers potentially eligible, examined for eligibility, confirmed eligible, included in the study, completing follow-up, and analysed)<br>(b) Give reasons for non-participation at each stage.<br>(c) Consider use of a flow diagram                          |  | RECORD 13.1: Describe in detail the selection of the persons included in the study ( <i>i.e.</i> , study population selection) including filtering based on data quality, data availability and linkage. The selection of included persons can be described in the text and/or by means of the study flow diagram. | Methods P6<br>L141-147<br><br>Results P8 L191-194 |
| Descriptive data | 14 | (a) Give characteristics of study participants ( <i>e.g.</i> , demographic, clinical, social) and information on exposures and potential confounders<br>(b) Indicate the number of participants with missing data for each variable of interest<br>(c) <i>Cohort study</i> - summarise follow-up time ( <i>e.g.</i> , average and total amount) |  |                                                                                                                                                                                                                                                                                                                    | Results P8 L191-194                               |
| Outcome data     | 15 | <i>Cohort study</i> - Report numbers of outcome events or summary measures over time<br><i>Case-control study</i> - Report numbers in each exposure                                                                                                                                                                                             |  |                                                                                                                                                                                                                                                                                                                    | Results P8-9<br>L195-206                          |

|                   |    |                                                                                                                                                                                                                                                                                                                                                                                                                 |  |                                                                                                                                                                                                                                                                                                          |                             |
|-------------------|----|-----------------------------------------------------------------------------------------------------------------------------------------------------------------------------------------------------------------------------------------------------------------------------------------------------------------------------------------------------------------------------------------------------------------|--|----------------------------------------------------------------------------------------------------------------------------------------------------------------------------------------------------------------------------------------------------------------------------------------------------------|-----------------------------|
|                   |    | category, or summary measures of exposure<br><i>Cross-sectional study</i> - Report numbers of outcome events or summary measures                                                                                                                                                                                                                                                                                |  |                                                                                                                                                                                                                                                                                                          |                             |
| Main results      | 16 | (a) Give unadjusted estimates and, if applicable, confounder-adjusted estimates and their precision (e.g., 95% confidence interval). Make clear which confounders were adjusted for and why they were included<br>(b) Report category boundaries when continuous variables were categorized<br>(c) If relevant, consider translating estimates of relative risk into absolute risk for a meaningful time period |  |                                                                                                                                                                                                                                                                                                          | Results P9-11<br>L196-267   |
| Other analyses    | 17 | Report other analyses done— e.g., analyses of subgroups and interactions, and sensitivity analyses                                                                                                                                                                                                                                                                                                              |  |                                                                                                                                                                                                                                                                                                          | Results P9-11<br>L196-267   |
| <b>Discussion</b> |    |                                                                                                                                                                                                                                                                                                                                                                                                                 |  |                                                                                                                                                                                                                                                                                                          |                             |
| Key results       | 18 | Summarise key results with reference to study objectives                                                                                                                                                                                                                                                                                                                                                        |  |                                                                                                                                                                                                                                                                                                          | Discussion P11-12, L268-288 |
| Limitations       | 19 | Discuss limitations of the study, taking into account sources of potential bias or imprecision. Discuss both direction and magnitude of any potential bias                                                                                                                                                                                                                                                      |  | RECORD 19.1: Discuss the implications of using data that were not created or collected to answer the specific research question(s). Include discussion of misclassification bias, unmeasured confounding, missing data, and changing eligibility over time, as they pertain to the study being reported. | Discussion P12-13 L289-303  |
| Interpretation    | 20 | Give a cautious overall interpretation of results considering objectives,                                                                                                                                                                                                                                                                                                                                       |  |                                                                                                                                                                                                                                                                                                          | Discussion P13-14 L317-340  |

|                                                           |    |                                                                                                                                                               |  |                                                                                                                                                          |                                                        |
|-----------------------------------------------------------|----|---------------------------------------------------------------------------------------------------------------------------------------------------------------|--|----------------------------------------------------------------------------------------------------------------------------------------------------------|--------------------------------------------------------|
|                                                           |    | limitations, multiplicity of analyses, results from similar studies, and other relevant evidence                                                              |  |                                                                                                                                                          |                                                        |
| Generalisability                                          | 21 | Discuss the generalisability (external validity) of the study results                                                                                         |  |                                                                                                                                                          | Discussion P13<br>L294-303                             |
| <b>Other Information</b>                                  |    |                                                                                                                                                               |  |                                                                                                                                                          |                                                        |
| Funding                                                   | 22 | Give the source of funding and the role of the funders for the present study and, if applicable, for the original study on which the present article is based |  |                                                                                                                                                          | Funding Statement P16<br>L375-380                      |
| Accessibility of protocol, raw data, and programming code |    | ..                                                                                                                                                            |  | RECORD 22.1: Authors should provide information on how to access any supplemental information such as the study protocol, raw data, or programming code. | Methods P8<br>L186-188<br>Data Sharing P17<br>L392-400 |

\*Reference: Benchimol EI, Smeeth L, Guttman A, Harron K, Moher D, Petersen I, Sørensen HT, von Elm E, Langan SM, the RECORD Working Committee. The REporting of studies Conducted using Observational Routinely-collected health Data (RECORD) Statement. *PLoS Medicine* 2015; in press.

\*Checklist is protected under Creative Commons Attribution ([CC BY](https://creativecommons.org/licenses/by/4.0/)) license.

# BMJ Open

## The impact of pausing elective hip and knee replacement surgery during winter 2017 on subsequent service provision at a major NHS Trust: a descriptive observational study using interrupted time series

|                                 |                                                                                                                                                                                                                                                                                                                                                                                                                                                                                                                                                                                                                                                                                                                                                                                                                                                                                                                             |
|---------------------------------|-----------------------------------------------------------------------------------------------------------------------------------------------------------------------------------------------------------------------------------------------------------------------------------------------------------------------------------------------------------------------------------------------------------------------------------------------------------------------------------------------------------------------------------------------------------------------------------------------------------------------------------------------------------------------------------------------------------------------------------------------------------------------------------------------------------------------------------------------------------------------------------------------------------------------------|
| Journal:                        | <i>BMJ Open</i>                                                                                                                                                                                                                                                                                                                                                                                                                                                                                                                                                                                                                                                                                                                                                                                                                                                                                                             |
| Manuscript ID                   | bmjopen-2022-066398.R2                                                                                                                                                                                                                                                                                                                                                                                                                                                                                                                                                                                                                                                                                                                                                                                                                                                                                                      |
| Article Type:                   | Original research                                                                                                                                                                                                                                                                                                                                                                                                                                                                                                                                                                                                                                                                                                                                                                                                                                                                                                           |
| Date Submitted by the Author:   | 30-Mar-2023                                                                                                                                                                                                                                                                                                                                                                                                                                                                                                                                                                                                                                                                                                                                                                                                                                                                                                                 |
| Complete List of Authors:       | Jones, Tim; University Hospitals Bristol and Weston NHS Foundation Trust, NIHR ARC West; University of Bristol, Department of Population Health Sciences<br>Penfold, Chris; University Hospitals Bristol and Weston NHS Foundation Trust, NIHR ARC West; University of Bristol, Musculoskeletal Research Unit<br>Redaniel, Maria Theresa; University Hospitals Bristol and Weston NHS Foundation Trust, NIHR ARC West; University of Bristol, Population Health Sciences, Bristol Medical School<br>Eyles, Emily; University Hospitals Bristol and Weston NHS Foundation Trust, NIHR ARC West; University of Bristol, Population Health Sciences, Bristol Medical School<br>Keen, Tim; North Bristol NHS Trust<br>Elliott, Andrew; North Bristol NHS Trust<br>Blom, AW; University of Bristol, Translational Health Sciences, Bristol Medical School<br>Judge, Andrew; University of Bristol, Musculoskeletal Research Unit |
| <b>Primary Subject Heading</b>: | Health services research                                                                                                                                                                                                                                                                                                                                                                                                                                                                                                                                                                                                                                                                                                                                                                                                                                                                                                    |
| Secondary Subject Heading:      | Surgery                                                                                                                                                                                                                                                                                                                                                                                                                                                                                                                                                                                                                                                                                                                                                                                                                                                                                                                     |
| Keywords:                       | Knee < ORTHOPAEDIC & TRAUMA SURGERY, Hip < ORTHOPAEDIC & TRAUMA SURGERY, Orthopaedic & trauma surgery < SURGERY, Human resource management < HEALTH SERVICES ADMINISTRATION & MANAGEMENT                                                                                                                                                                                                                                                                                                                                                                                                                                                                                                                                                                                                                                                                                                                                    |
|                                 |                                                                                                                                                                                                                                                                                                                                                                                                                                                                                                                                                                                                                                                                                                                                                                                                                                                                                                                             |

SCHOLARONE™  
Manuscripts



I, the Submitting Author has the right to grant and does grant on behalf of all authors of the Work (as defined in the below author licence), an exclusive licence and/or a non-exclusive licence for contributions from authors who are: i) UK Crown employees; ii) where BMJ has agreed a CC-BY licence shall apply, and/or iii) in accordance with the terms applicable for US Federal Government officers or employees acting as part of their official duties; on a worldwide, perpetual, irrevocable, royalty-free basis to BMJ Publishing Group Ltd ("BMJ") its licensees and where the relevant Journal is co-owned by BMJ to the co-owners of the Journal, to publish the Work in this journal and any other BMJ products and to exploit all rights, as set out in our [licence](#).

The Submitting Author accepts and understands that any supply made under these terms is made by BMJ to the Submitting Author unless you are acting as an employee on behalf of your employer or a postgraduate student of an affiliated institution which is paying any applicable article publishing charge ("APC") for Open Access articles. Where the Submitting Author wishes to make the Work available on an Open Access basis (and intends to pay the relevant APC), the terms of reuse of such Open Access shall be governed by a Creative Commons licence – details of these licences and which [Creative Commons](#) licence will apply to this Work are set out in our licence referred to above.

Other than as permitted in any relevant BMJ Author's Self Archiving Policies, I confirm this Work has not been accepted for publication elsewhere, is not being considered for publication elsewhere and does not duplicate material already published. I confirm all authors consent to publication of this Work and authorise the granting of this licence.

1  
2  
3 1 **Title:** The impact of pausing elective hip and knee replacement surgery during winter 2017 on  
4  
5 2 subsequent service provision at a major NHS Trust: a descriptive observational study using  
6  
7 3 interrupted time series  
8  
9

10 4  
11  
12  
13 5 **Authors:** Tim Jones<sup>1,2,3</sup>, Christopher Penfold<sup>1,2,3</sup>, Maria Theresa Redaniel<sup>1,2</sup>, Emily Eyles<sup>1,2</sup>, Tim Keen<sup>4</sup>,  
14  
15 6 Andrew Elliott<sup>4</sup>, Ashley Blom<sup>2,3</sup>, Andrew Judge<sup>3,5</sup>  
16  
17

18  
19  
20  
21 8 <sup>1</sup> NIHR ARC West, University Hospitals Bristol NHS Foundation Trust, Bristol, BS1 2NT, UK  
22

23  
24 9 <sup>2</sup> Department of Population Health Sciences, Bristol Medical School, University of Bristol, BS8 2PS,  
25  
26 10 UK  
27

28  
29 11 <sup>3</sup> Musculoskeletal Research Unit, Translational Health Sciences, Bristol Medical School, University of  
30  
31 12 Bristol, Learning and Research Building, Level 1, Southmead Hospital, Bristol, BS10 5NB, UK  
32

33  
34 13 <sup>4</sup> North Bristol NHS Trust, Southmead Hospital, Westbury-on-Trym, Bristol, BS10 5NB, UK  
35

36  
37 14 <sup>5</sup> National Institute for Health Research Bristol Biomedical Research Centre, University Hospitals  
38  
39 15 Bristol and Weston NHS Foundation Trust and University of Bristol, Bristol, UK  
40

41  
42  
43 16  
44 17 **Corresponding author:**

45  
46 18 Tim Jones  
47  
48 19 Research Fellow  
49  
50 20 NIHR ARC West,  
51  
52 21 9<sup>th</sup> Floor Whitefriars,  
53  
54 22 Lewin's Mead  
55  
56 23 Bristol, BS1 2NT  
57  
58 24 United Kingdom

59  
60 25  
26 26 Tel: ++44 (0)117 342 1265

27 27 [Timothy.Jones@bristol.ac.uk](mailto:Timothy.Jones@bristol.ac.uk)

28  
29 28  
29 29 **Word count [3,957]**

1  
2  
3 30 **ABSTRACT**

4  
5 31 **Objectives:** To explore the impact of a temporary cancellation of elective surgery in winter 2017 on  
6  
7 32 trends in primary hip and knee replacement at a major NHS Trust, and whether lessons can be learnt  
8  
9 33 about efficient surgery provision.

10  
11  
12 34 **Design and Setting:** Observational descriptive study using interrupted time series analysis of hospital  
13  
14 35 records to explore trends in primary hip and knee replacement surgery at a major NHS Trust, as well  
15  
16 36 as patient characteristics, 2016-2019.

17  
18  
19 37 **Intervention:** A temporary cancellation of elective services for two months in winter 2017

20  
21  
22 38 **Outcomes:** NHS-funded hospital admissions for primary hip or knee replacement, length of stay and  
23  
24 39 bed occupancy. Additionally, we explored the ratio of elective to emergency admissions at the Trust  
25  
26 40 as a measure of elective capacity, and the ratio of public to private provision of NHS-funded hip and  
27  
28 41 knee surgery.

29  
30  
31 42 **Results:** After winter 2017 there was a sustained reduction in the number of knee replacements, a  
32  
33 43 decrease in the proportion of most deprived people having knee replacements, and an increase in  
34  
35 44 average age for knee replacement and comorbidity for both types of surgery. The ratio of public to  
36  
37 45 private provision dropped after winter 2017, and elective capacity generally has reduced over time.  
38  
39 46 There was clear seasonality in provision of elective surgery, with less-complex patients admitted  
40  
41 47 during winter.

42  
43  
44 48 **Conclusions:** Declining elective capacity and seasonality has a marked effect on the provision of joint  
45  
46 49 replacement, despite efficiency improvements in hospital treatment. The Trust has outsourced less  
47  
48 50 complex patients to independent providers, and/or treated them during winter when capacity is  
49  
50 51 most limited. There is a need to explore whether these are strategies that could be used explicitly to  
51  
52 52 maximise the use of limited elective capacity, provide benefit to patients, and value for money for  
53  
54 53 taxpayers.  
55  
56  
57  
58  
59  
60



1  
2  
3 54 **STRENGTH AND LIMITATIONS OF THIS STUDY**  
4  
5

- 6 55 • Trends analyses using data obtained from the electronic health records of a local hospital  
7  
8 NHS Trust are informative for clinicians and service managers in monitoring changes in  
9 56  
10 planning and delivery of elective surgery, and could be regularly updated in near real time  
11 57  
12 for monitoring.  
13 58  
14 • The inclusion of wider hospital admissions data beyond the NHS Trust allows us to estimate  
15 59  
16 the proportion of people within the Trust catchment area having NHS-funded treatment at  
17 60  
18 independent providers.  
19 61  
20 • We report the experience of one NHS Trust that is one of the larger elective orthopaedic  
21 62  
22 centres - the findings may not be generalisable to or reflect the experience of other trusts.  
23 63  
24 • Our study does not include privately funded, privately provided hip and knee surgery which  
25 64  
26 may also have been changing over time.  
27 65  
28  
29  
30  
31  
32  
33  
34  
35  
36  
37  
38  
39  
40  
41  
42  
43  
44  
45  
46  
47  
48  
49  
50  
51  
52  
53  
54  
55  
56  
57  
58  
59  
60

## 75 INTRODUCTION

76 Primary hip and knee replacement operations are common planned elective surgical procedures.

77 They are highly clinically effective for improving symptoms of pain and functional limitations, and

78 have been shown to be safe and cost-effective.<sup>1-4</sup> Around 100,000 hip<sup>4</sup> and over 100,000 knee

79 operations<sup>3</sup> are carried out each year in the UK. Demand for these operations has been increasing

80 substantially in recent decades<sup>5</sup> with an ageing population, rising levels of obesity, and widening

81 indications for surgery in younger patient groups.<sup>3 4</sup>

82 Orthopaedic services have become more efficient over time, with length of hospital stay for primary

83 hip and knee replacements reducing from around 15 days in 1997 to roughly 5.5 days in 2014.<sup>6</sup> This is

84 largely due to the introduction of 'fast track' surgery and enhanced recovery services,<sup>7</sup> which reduce

85 length of stay whilst maintaining patient safety and outcomes of surgery.<sup>6</sup> However, over the past

86 decade there has also been a reduction in the numbers of hospital beds and operating theatres

87 available for hip and knee replacement patients.<sup>8</sup> Waiting lists for orthopaedic procedures have been

88 growing over time, and the average time people wait for treatment once on the waiting list has also

89 increased.<sup>9</sup>

90 Pressures on elective surgery are exacerbated during winter, when resources for planned surgery are

91 often displaced by more acute, unplanned hospital admissions.<sup>8</sup> At the end of 2017, this led to all

92 planned elective hip and knee replacement operations in England being cancelled for the whole of

93 January.<sup>10</sup> Even before the COVID-19 pandemic, over half a million people were already on the waiting

94 list.<sup>11</sup> Patients are having to wait longer with deteriorating severe pain and functional limitation,

95 affecting their health and quality of life. The COVID-19 pandemic has had an even greater impact on

96 cancelling planned elective surgery, with over 635,000 people waiting for hip and knee replacements

97 in April 2021, more than 10% of these waiting over a year, and over a third waiting longer than the 18

98 week target.<sup>11</sup>

1  
2  
3 99 The winter of 2017 provides a form of 'natural experiment', where elective capacity was intentionally  
4  
5 100 reduced close to zero. A natural experimental design is a valid methodological approach to evaluate  
6  
7 101 the impact of a range of events, policies and interventions which are not under the control of  
8  
9 102 researchers.<sup>12</sup> Researchers can use the variation in exposure that natural experiments generate to  
10  
11 103 analyse their impact on health outcomes. This provides a form of quasi-experimental study, where we  
12  
13 104 can explore trends in provision of elective surgery before and after Winter 2017, which is a robust  
14  
15 105 approach to explore real-world impact when randomisation is not possible.<sup>13 14</sup>

16  
17  
18  
19 106 Our aim was to understand what happens after common, planned elective surgery is temporarily  
20  
21 107 cancelled, and how this might inform optimum planning of elective surgery when capacity is limited,  
22  
23 108 such as following the COVID-19 pandemic. We used interrupted time series analysis to model trends  
24  
25 109 in elective hip and knee replacement surgery for a major NHS Trust from 2016 to 2019 and see how  
26  
27 110 these were impacted by the withdrawal of elective surgery in winter 2017. We explored these trends  
28  
29 111 by patient factors (age, sex, deprivation, number of comorbidities) and seasonality to see when  
30  
31 112 demand was highest for different patient groups.

32  
33  
34  
35  
36 113

## 37 114 **METHODS**

38  
39  
40  
41 115 This study is a longitudinal observational descriptive study using routinely collected administrative  
42  
43 116 information about patients admitted to a major NHS Trust for elective hip and knee replacements,  
44  
45 117 2016 to 2019. It was developed and reported according to the RECORD extension<sup>15</sup> to STROBE  
46  
47 118 guidelines for observational studies using routinely collected data.

### 48 49 50 119 **Data Sources**

51  
52  
53 120 We used two data sources for our analyses. The first was an extract of elective primary hip and knee  
54  
55 121 replacement inpatient admissions identified from the Trust's electronic medical records (EMR)  
56  
57 122 between 1<sup>st</sup> January 2016 and 31<sup>st</sup> December 2019. Up to 29 diagnoses were provided per entry using  
58  
59 123 the International Classification of Diseases version 10 (ICD-10), and up to 11 procedures were provided

1  
2  
3 124 per entry using the Office of Population Censuses and Surveys Classification of Interventions and  
4  
5 125 Procedures version 4 (OPCS-4). The extract included patient demographics such as age, sex,  
6  
7 126 deprivation quintile, and comorbidities; and other characteristics of the hospital admissions such as  
8  
9  
10 127 length of stay. This data source was used for all analyses of hip and knee replacements at the Trust,  
11  
12 128 including those relating to patient demographics, length of stay, and bed occupancy.  
13  
14

15 129 The second data source was pseudonymised national admitted patient care Hospital Episode  
16  
17 130 Statistics (HES-APC) between 1<sup>st</sup> January 2016 and 31<sup>st</sup> December 2019. HES-APC is a routinely  
18  
19 131 collected dataset that records all episodes of admitted (day case or inpatient) care provided to  
20  
21 132 patients at NHS hospitals in England and to NHS-funded patients treated in independent hospitals.<sup>16</sup>  
22  
23 133 Each episode represents a period of care under one consultant team. Up to 20 diagnoses and 24  
24  
25 134 clinical procedures are recorded per episode using ICD-10 codes and OPCS-4 codes, respectively. HES  
26  
27 135 also includes the Lower Super Output Area (LSOA; an area of around 1,500 people) of residence for  
28  
29 136 each patient, which can be linked to CCG of residence. This data source was used to estimate  
30  
31 137 elective capacity overall at the Trust, and the ratio of public/private provision of hip and knee  
32  
33 138 replacements in the catchment area for the Trust (see details below), which could not be gathered  
34  
35 139 from the extract provided from the Trust EMR.  
36  
37  
38  
39

#### 40 140 **Hospital admissions for hip and knee replacements**

41  
42 141 Hospital admissions for elective hip and knee replacements were identified by entries with a primary  
43  
44 142 procedure code representing primary hip or knee replacement (Supplementary Table T1) using the  
45  
46 143 Trust EMR. We used this information to explore summary characteristics of the hospital admissions  
47  
48 144 over time (overall counts of admissions, average age, proportion of women, proportion with 2+  
49  
50 145 comorbidities, proportion in the two most deprived quintiles) stratified by primary hip or knee  
51  
52 146 replacements.  
53  
54  
55

#### 56 147 **Length of stay and bed occupancy**

57  
58  
59  
60

1  
2  
3 148 We used the average number of overnight stays in hospital (days) for length of stay, trimmed at 30  
4  
5 149 days to exclude a small number of outliers (n=32, 0.6%). Trimming allowed us to model averages  
6  
7 150 assuming a roughly normal distribution which we felt was more easily interpretable. Bed occupancy  
8  
9 151 was the total number of beds used overnight for hip and knee replacement patients.  
10  
11  
12

### 13 152 **Comorbidity of Admissions**

14  
15 153 For each admission, we counted the number of conditions from the Charlson comorbidity index<sup>17</sup>  
16  
17 154 recorded in the diagnosis fields. The Charlson index provides a summary of weighted scores relating  
18  
19 155 to different comorbidities and has been shown to be associated with mortality. Admissions were  
20  
21 156 categorised into those with zero, one, and two or more Charlson comorbidities.  
22  
23  
24

### 25 157 **Ratio of Elective to Emergency Admissions**

26  
27 158 To estimate the ratio of elective to emergency admissions for all purposes at the Trust (as a proxy for  
28  
29 159 elective capacity), we extracted all hospital admissions from HES-APC with the Trust as a provider  
30  
31 160 and categorised them into elective and emergency (admission method beginning with '1' or '2',  
32  
33 161 respectively).  
34  
35  
36

### 37 162 **Ratio of Public to Private Provision of Hip and Knee Replacements**

38  
39 163 To estimate the ratio of public to private provision of NHS-funded elective hip and knee surgery for  
40  
41 164 the Trust catchment area, we extracted all hospital admissions for primary hip and knee  
42  
43 165 replacements (codes in Supplementary Table T1) for residents of the major local clinical  
44  
45 166 commissioning groups (CCGs) from HES-APC (using 2021 CCG boundaries after local CCGs had  
46  
47 167 merged into one CCG<sup>18</sup>), and categorised providers into public and private (provider code beginning  
48  
49 168 with 'R' or 'N', respectively).  
50  
51  
52

### 53 169 **Statistical Analysis**

54  
55  
56 170 We explored the change in trend for the following outcomes before/after the winter 2017 cancellation  
57  
58 171 of elective surgery, stratified by primary hip and knee replacements: number of hospital admissions;  
59  
60

1  
2  
3 172 average age of patients; proportion of women; proportion with 2+ comorbidities; proportion in more  
4  
5 173 deprived deprivation quintiles (4 and 5); average length of stay; bed occupancy; and ratio of public to  
6  
7 174 private provision of surgery. Additionally, we explored the overall ratio of elective to emergency  
8  
9 175 admissions at the hospital for any purpose without stratification. For each of the outcomes, we  
10  
11 176 conducted interrupted time series (ITS) analyses using segmented regression models comparing  
12  
13 177 hospital admissions in the 'before' period (January 2016 to November 2017) to the 'after' period  
14  
15 178 (February 2018 to December 2019). We excluded the winter 2017 period when admissions were very  
16  
17 179 low (December 2017 and January 2018). The ITS analyses explored the 'pre-trend' before winter 2017,  
18  
19 180 and how this trend changed after winter 2017<sup>12 19</sup>, allowing for an immediate 'level change' up or  
20  
21 181 down in February 2018, and a longer-term 'trend change' in the slope afterwards. We explored  
22  
23 182 seasonality in the data by including indicator variables for spring, summer, and autumn<sup>19</sup> compared  
24  
25 183 to winter as a baseline, and adjusted for serial autocorrelation using Newey-West standard errors with  
26  
27 184 a maximum lag of two<sup>20-22</sup>. For count or proportion outcomes (number of admissions, proportion  
28  
29 185 women, proportion with 2+ comorbidities, proportion in top two deprivation quintiles, bed  
30  
31 186 occupancy) segmented Poisson regression models were fit to the data, whilst for averages/ratios  
32  
33 187 (average age, average length of stay, ratio of elective to emergency admissions, ratio of public to  
34  
35 188 private provision) segmented linear regression models were fit, using the 'glm' command in Stata.  
36  
37 189 Sensitivity analyses were conducted adjusting the maximum lag for serial autocorrelation to zero and  
38  
39 190 five; this would not affect point estimates but could alter standard errors, confidence intervals, and p-  
40  
41 191 values.

42  
43 192 All statistical analyses were conducted using Stata/MP version 16.1. Smoothed trends were fit to the  
44  
45 193 data on all plots using the 'lowess' command with bandwidth 0.3. Stata code is available at:  
46  
47 194 [https://github.com/jonestim2002/hdr\\_uk\\_hospital\\_efficiency](https://github.com/jonestim2002/hdr_uk_hospital_efficiency)

## 195 **Patient and public involvement**

1  
2  
3 196 Initial research ideas for the grant application of which this work is part were presented to the public  
4  
5 197 in a workshop and suggestions and comments were incorporated in the protocol. Feedback during  
6  
7 198 the workshop was positive, with participants agreeing with the research objectives and the  
8  
9 199 identified need.  
10  
11  
12  
13 200  
14  
15

## 16 201 RESULTS

### 17 202 *Descriptive information and demographics*

18  
19  
20 202  
21  
22 203 A total of 2,623 patients had a hip replacement and 2,674 had a knee replacement at the Trust in the  
23  
24 204 4 years between 2016 and 2019. The mean age of patients was 67 years and 60% were women for  
25  
26 205 both types of operations.  
27  
28  
29 206  
30  
31

### 32 207 *Trend changes after winter 2017*

33  
34  
35 208 Table 1 shows the results of our interrupted time series analyses for all outcomes, including the  
36  
37 209 trend before winter 2017 (pre-trend), any immediate change after winter 2017 (level change) and  
38  
39 210 any change in the slope after winter 2017 (trend change). These are described in more detail below.  
40  
41  
42 211  
43  
44

45 212 **Table 1. Interrupted time series model results**

|                     | pre-trend          |       | level change        |       | trend change       |       |
|---------------------|--------------------|-------|---------------------|-------|--------------------|-------|
|                     | estimate (95% CI)  | p     | estimate (95% CI)   | p     | estimate (95% CI)  | p     |
| Hip Admissions      | 1 (0.99,1)         | 0.300 | 1.06 (0.91,1.22)    | 0.469 | 0.99 (0.98,1.01)   | 0.239 |
| Hip Age*            | -0.01 (-0.1,0.07)  | 0.737 | 1.57 (-0.1,3.24)    | 0.065 | -0.06 (-0.17,0.05) | 0.307 |
| Hip Prop Women      | 1 (0.99,1)         | 0.582 | 0.97 (0.86,1.08)    | 0.549 | 1.01 (1,1.02)      | 0.089 |
| Hip Charlson        | 0.99 (0.98,1.01)   | 0.380 | 1.41 (1.06,1.87)    | 0.017 | 1.01 (0.99,1.03)   | 0.220 |
| Hip Deprivation     | 1 (0.99,1.01)      | 0.587 | 1.03 (0.87,1.21)    | 0.754 | 1 (0.99,1.02)      | 0.660 |
| Hip LoS*            | -0.01 (-0.03,0.02) | 0.660 | 0.31 (-0.19,0.82)   | 0.225 | -0.01 (-0.05,0.02) | 0.425 |
| Hip Bed Occ         | 1 (0.99,1.01)      | 0.643 | 1 (0.84,1.19)       | 0.997 | 0.99 (0.97,1)      | 0.149 |
| Hip Public Private* | 0.01 (-0.02,0.04)  | 0.377 | -0.74 (-1.24,-0.25) | 0.003 | -0.02 (-0.05,0.01) | 0.218 |
| Knee Admissions     | 1 (0.99,1)         | 0.106 | 0.84 (0.73,0.98)    | 0.022 | 1 (1,1.01)         | 0.256 |
| Knee Age*           | -0.08 (-0.16,0)    | 0.054 | -1.63 (-2.99,-0.28) | 0.018 | 0.21 (0.12,0.31)   | 0.000 |

|                      |                   |       |                    |       |                     |       |
|----------------------|-------------------|-------|--------------------|-------|---------------------|-------|
| Knee Prop Women      | 1 (1,1.01)        | 0.150 | 0.96 (0.85,1.08)   | 0.513 | 0.99 (0.99,1)       | 0.193 |
| Knee Charlson        | 1.01 (0.99,1.03)  | 0.249 | 0.64 (0.46,0.89)   | 0.009 | 1.04 (1.02,1.07)    | 0.001 |
| Knee Deprivation     | 1.01 (1,1.01)     | 0.189 | 0.97 (0.79,1.19)   | 0.758 | 0.99 (0.97,1)       | 0.021 |
| Knee LoS*            | -0.02 (-0.05,0)   | 0.058 | 0.18 (-0.28,0.63)  | 0.449 | -0.01 (-0.04,0.02)  | 0.566 |
| Knee Bed Occ         | 0.99 (0.98,1)     | 0.103 | 0.83 (0.7,0.99)    | 0.037 | 1 (0.99,1.01)       | 0.993 |
| Knee Public Private* | 0.01 (-0.02,0.03) | 0.667 | -0.48 (-1.03,0.07) | 0.090 | -0.02 (-0.04,0.01)  | 0.225 |
| Elec Emerg Ratio*    | -0.01 (-0.01,0)   | 0.171 | -0.32 (-0.45,-0.2) | 0.000 | -0.02 (-0.03,-0.01) | 0.003 |

Notes: \*Linear regression model (additive) rather than Poisson regression model (multiplicative). Shaded cells indicate  $p < 0.05$ .

## Trends in hip and knee elective hospital admissions over time

The overall numbers of elective primary hip and knee replacement operations gradually declined over the study period from 63 hip and 65 knee replacements per month in 2016 to 49 hip and 51 knee replacements per month in 2019. Whilst there was a drop off in winter 2017, after elective surgery was re-started hip replacements resumed at similar numbers and continued to decline along a similar trajectory. Numbers of knee replacements dropped by 16% after winter 2017 (level change=0.843, 95% CI: 0.728 to 0.976,  $p=0.022$ ), and the slope appeared to level off, although there was little evidence for this in the regression model (trend change=1.005, 95% CI: 0.996 to 1.014,  $p=0.256$ ); see Figure 1 and Supplementary Table T2.

## Age on Admission

There was a change in the trend in average age for knee replacements after winter 2017 (trend change=+0.21, 95% CI: 0.12 to 0.31,  $p < 0.001$ ) towards treating older patients over time (+1.59 years of age per year); see Figure 2.

## Comorbidity of Admissions

There was a level change upwards in the proportion having hip replacements with 2+ comorbidities after winter 2017 (level change=1.411, 95% CI: 1.064 to 1.873,  $p=0.017$ ), and an upward slope change for knee replacements (trend change=1.042, 95% CI: 1.017 to 1.067,  $p=0.001$ ); see Figure 3.



1  
2  
3 235  
4  
5 236*Deprivation*

7 237 There was evidence of a reducing proportion of the most deprived people having knee replacements  
8  
9  
10 238 after winter 2017 (trend change=0.986, 95% CI: 0.974 to 0.998, p=0.021).

11  
12 239  
1314 240 *Ratio of elective admissions to emergency admissions at the Trust*

17 241 There was an overall downward trend in the ratio of elective to emergency admissions at the Trust,  
18  
19 242 from an average of 2.91 (SD: 0.17) electives for every emergency in 2016 to 2.16 (SD: 0.06) in 2019;  
20  
21 243 see Supplementary Figure F1. The ratio reduced after winter 2017 (level change=-0.322, 95% CI: -  
22  
23 244 0.446 to -0.198, p<0.001), and started to decrease more rapidly afterwards (trend change=-0.016,  
24  
25 245 95% CI: -0.026 to -0.005, p=0.003).

26  
27  
28  
29 246  
30  
3132 247 *Ratio of public to private provision of hip/knee elective surgery at the Trust*

35 248 There was evidence of a level change downwards in public provision compared to private provision  
36  
37 249 after winter 2017 for both types of surgery, but particularly for hip replacements (hips level  
38  
39 250 change=-0.741, 95% CI: -1.237 to -0.245, p=0.003; knees level change=-0.476, 95% CI: -1.026 to  
40  
41 251 +0.074, p=0.09); see Figure 4.

42  
43  
44 252  
45  
4647 253 *Bed Occupancy*

50 254 For hip and knee replacements, bed occupancy has reduced over time, although there wasn't  
51  
52 255 evidence of this in the regression model for hip replacements, and there was a level change  
53  
54 256 downwards (level change=0.834, 95% CI: 0.704 to 0.989, p=0.037) for knee surgery after winter  
55  
56 257 2017; see Figure 5.

57  
58  
59  
60 258

1  
2  
3 259 *Length of Stay*  
4  
5

6 260 The average length of hospital stay was 5.5 days (SD: 5.9 days) for hip replacements and 5.2 days  
7  
8 261 (SD: 5.0 days) for knee replacements in 2016, compared to 5.1 days (SD: 4.1 days) and 4.3 days (SD:  
9  
10 262 3.4 days) respectively in 2019 (see Supplementary Figure F2). However, there was no evidence in the  
11  
12 263 regression models for a change after winter 2017.  
13  
14  
15

16 264

17  
18 265 *Seasonality*  
19  
20

21 266 Supplementary Table T2 shows seasonality results for each of our interrupted time series analyses.  
22  
23 267 Hip and knee operations were clearly seasonal, with higher admissions in non-winter months  
24  
25 268 compared to winter; 21% higher in the highest season (summer) for hips (summer=1.207, 95% CI:  
26  
27 269 1.094 to 1.332,  $p<0.001$ ), and 31% higher in the highest season (spring) for knee replacements  
28  
29 270 (spring=1.308, 95% CI: 1.157 to 1.479,  $p<0.001$ ), excluding winter 2017. Bed occupancy for both  
30  
31 271 types of operation was also seasonal, with lower occupancy in the winter months compared to all  
32  
33 272 other seasons (see Supplementary Table T2); e.g. summer bed occupancy was 324 beds for hips and  
34  
35 273 291 beds for knees on average compared to winter bed occupancy of 225 beds for hips and 199 beds  
36  
37 274 for knees on average. Length of stay was longer in spring than winter for hip replacements  
38  
39 275 (spring=+0.502 days, 95% CI: 0.214 to 0.79,  $p=0.001$ ), and longer in spring (+0.422 days, 95% CI:  
40  
41 276 0.073 to 0.771,  $p=0.018$ ) and autumn (+0.396 days, 95% CI: 0.015 to 0.777,  $p=0.042$ ) compared to  
42  
43 277 winter for knee replacements.  
44  
45  
46  
47  
48

49 278 The ratio of public to private provision was higher in the summer (1.56 for hips and 1.28 for knees)  
50  
51 279 compared to winter (1.22 and 0.99, respectively) months (hips summer=+0.308, 95% CI 0.154 to  
52  
53 280 0.463,  $p<0.001$ ; knees summer=+0.276, 95% CI: 0.035 to 0.517,  $p=0.025$ ).  
54  
55

56 281 There was also some evidence of seasonality in the types of patients being admitted for hip and  
57  
58 282 knee replacements. For hip replacements, the mean age of patients was 66 in winter compared to  
59  
60

1  
2  
3 283 68 in summer (summer=+2.09; 95% CI: 0.81 to 3.37, p = 0.001); a higher proportion were performed  
4  
5 284 on women in the summer (64%) compared to winter (58%) months (summer=1.088, 95% CI: 1.001 to  
6  
7 285 1.183, p=0.048); and a higher proportion of people had 2+ comorbidities in the summer (15.9%)  
8  
9 286 compared to winter (12.3%) months (summer=1.306, 95% CI: 1.096 to 1.557, p=0.003). For knee  
10  
11 287 replacements, there was a higher proportion of more deprived people (quintiles 4 and 5) in the  
12  
13 288 spring (37.6%) compared to the winter (30.2%) months (spring=1.224, 95% CI: 1.077 to 1.49,  
14  
15 289 p=0.002).

16  
17  
18  
19 290

## 22 291 **DISCUSSION**

### 25 292 *Principal findings*

26  
27  
28  
29 293 The temporary cancellation of elective services during winter 2017 does appear to have had some  
30  
31 294 impact on service provision at the Trust after that time. There was an immediate and sustained  
32  
33 295 reduction in the number of knee replacements being done at the Trust and this was also reflected in  
34  
35 296 the drop in bed occupancy for knee surgery. The average age for knee replacement and comorbidity  
36  
37 297 of hip and knee surgery patients increased after winter 2017, whilst the proportion of more deprived  
38  
39 298 people having knee replacements decreased, and the ratio of public to private provision of hip and  
40  
41 299 knee replacements in the local area dropped after winter 2017. This suggests an NHS-funded  
42  
43 300 outsourcing of less comorbid hip and knee replacement surgery to independent providers, and  
44  
45 301 therefore on average the patients being treated at the Trust became older and more comorbid.  
46  
47 302 There was a general decrease in capacity for elective surgery at the Trust (ratio of elective to  
48  
49 303 emergency admissions), mostly driven by increasing non-elective admissions even before the COVID-  
50  
51 304 19 pandemic. The winter 2017 cancellation may have been just one symptom of this overall pressure  
52  
53 305 on elective surgery that underlies some of the longer-term changes in provision.  
54  
55  
56  
57  
58  
59  
60

1  
2  
3 306 There was also some seasonality in service provision. It is no surprise that elective admissions and  
4  
5 307 bed occupancy are lower in winter when the hospital requires capacity for an increase in unplanned  
6  
7 308 admissions. There were also indications that people being admitted in winter were younger, less  
8  
9  
10 309 comorbid, and less deprived (particularly for knee surgery). Length of stay for hip and knee  
11  
12 310 replacements was lower in winter compared to spring. This suggests the admission of younger, less  
13  
14 311 comorbid patients during the winter months given the reduced elective capacity and delaying  
15  
16 312 surgery for more comorbid patients to when capacity is higher in the following months.

### 20 313 *Strengths and limitations*

21  
22  
23 314 Trends analyses such as these, using data obtained from the EHR of a local hospital NHS Trust, are  
24  
25 315 informative for clinicians and service managers in monitoring changes in planning and delivery of  
26  
27 316 elective surgery, and could be regularly updated in near real time for monitoring. This concept might  
28  
29 317 be informative for other commissioning groups / Trusts to adopt for monitoring of their own elective  
30  
31 318 surgery and capacity. We report the experience of just one trust that is one of the larger elective  
32  
33 319 orthopaedic centres, and hence the findings may not be generalisable to or reflect the experience of  
34  
35 320 other trusts. Our findings are observational and report changes observed at the Trust following  
36  
37 321 cancellation of elective services in winter 2017; further work would be needed to understand the  
38  
39 322 impact of any changes on outcomes such as throughput of patients, waiting times, waiting lists,  
40  
41 323 outcomes of surgery, costs, and equity of access to surgery. There is likely to be some correlation  
42  
43 324 between the covariables explored; for example, older people tend to be less deprived and have  
44  
45 325 more comorbidities, which may account for some of our results. Some of the increase in age at  
46  
47 326 operation after winter 2017 may be due to increased waiting times for surgery. We should be aware  
48  
49 327 that some results may reflect chance findings due to multiple testing and type 1 error. The trends in  
50  
51 328 the data as plotted do not change substantially in sensitivity analyses accounting for different  
52  
53 329 autocorrelation lags (Supplementary Tables T3-T4). The catchment area of the Trust is not exactly  
54  
55 330 the same as the major local CCG and is difficult to define exactly. However, 89.4% of admissions at  
56  
57  
58  
59  
60

1  
2  
3 331 the Trust were for residents of the local CCG and we felt this was a reasonable approximation to  
4  
5 332 estimate the ratio of public to private provision in the Trust catchment area. Our analyses only  
6  
7 333 include NHS-funded surgery and not privately-funded, privately-provided surgery.  
8  
9

#### 10 334 *Comparison to other studies*

11  
12  
13  
14 335 A previous study<sup>23</sup> using data for England from Hospital Episode Statistics found increasing private  
15  
16 336 provision of elective hip arthroplasties nationally from 2007/8 to 2012/13, particularly for less  
17  
18 337 deprived people, which echoes our findings. More recent news stories have suggested that 20% of  
19  
20 338 NHS-funded hip replacements and 29% of NHS-funded knee replacements were carried out by  
21  
22 339 independent providers in 2016/17<sup>24</sup>, and that independently-provided hip and knee replacement  
23  
24 340 surgery (privately or NHS-funded) has now overtaken NHS provision.<sup>25</sup> A UK-wide study<sup>6</sup> using  
25  
26 341 primary care data (CPRD) linked to hospital admissions found similar effects of patient  
27  
28 342 characteristics (age, sex, comorbidity, and deprivation) on length of stay for primary hip and knee  
29  
30 343 replacements, although they did not explore seasonality. A recent qualitative study<sup>26</sup> highlighted the  
31  
32 344 negative financial and emotional impact of winter elective cancellations on patients and their  
33  
34 345 families and recommended better advanced planning of elective operations to reduce these  
35  
36 346 impacts.  
37  
38  
39  
40

#### 41 347 *Implications for clinicians and policy makers*

42  
43  
44 348 Outsourcing of less complex hip and knee replacements to take advantage of spare capacity in non-  
45  
46 349 NHS hospitals may be a good strategy to reduce waiting times and waiting lists for surgery and get  
47  
48 350 the best results for patients given the evident capacity limitations. It is a strategy that has already  
49  
50 351 been used in other NHS Trusts,<sup>27</sup> and outsourcing more generally is recognised by the British Medical  
51  
52 352 Association as a short-term solution to reducing waiting lists, although they recommend this goes  
53  
54 353 alongside a longer-term commitment to increased NHS capacity.<sup>28</sup> The evidence is unclear regarding  
55  
56 354 the impact of private provision on quality of care for patients and value for money for the public  
57  
58 355 sector,<sup>29 30</sup> with some studies indicating potentially lower quality of healthcare.<sup>31</sup> There are questions  
59  
60

1  
2  
3 356 about how much it increases staff capacity because some staff transfer from public to private  
4  
5 357 practice.<sup>28 29</sup> It would also leave the NHS Trust to cope with more complex cases,<sup>30</sup> which could have  
6  
7  
8 358 a detrimental impact on their service.  
9

10  
11 359 There are training implications of outsourcing because trainee surgeons are usually trained in NHS  
12  
13 360 hospitals by first undertaking less-complex cases on healthier patients. Trainees can find they are  
14  
15 361 redeployed away from training to cover for a lack of trained staff in the public sector, which may be  
16  
17 362 detrimental to their training and potentially harmful for patients.<sup>32 33</sup> The Royal College of Surgeons  
18  
19 363 offers guidance around appropriate redeployment of trainees.<sup>34</sup>  
20  
21  
22

23 364 There are also potential equity implications of outsourcing, if less complex cases have the option of  
24  
25 365 surgery with shorter waiting times at independent providers, whilst more complex (and potentially  
26  
27 366 more deprived) cases do not. We would need to consider the acceptability of this outsourcing to  
28  
29 367 patients and practitioners, and the quality of patient outcomes.  
30  
31  
32

33 368 There is an indication that some selection of patients for elective surgery depending on available  
34  
35 369 capacity already takes place at the Trust. It is possible that this could become a more explicit  
36  
37 370 strategy, based on evidence, to optimise the use of limited capacity in hospitals at different times of  
38  
39 371 the year. However, this could mean that people placed earlier on the waiting list for surgery might  
40  
41 372 get their surgery later due to such scheduling strategies, so acceptability to patients would need to  
42  
43 373 be explored. We need to understand how the scheduling and possible outsourcing of elective  
44  
45 374 surgery for different types of patients, depending on capacity, may impact on throughput of  
46  
47 375 patients, waiting times, waiting lists, outcomes of surgery, costs, and equity of access to surgery. An  
48  
49 376 appropriate balance would need to be achieved to maximise the benefits for patients, and research  
50  
51 377 is needed to understand what that balance is. Additionally, we need to understand whether this  
52  
53 378 type of scheduling and outsourcing is acceptable to people waiting for hip and knee surgery as well  
54  
55 379 as clinicians. These issues of optimising limited elective resources are in even sharper focus due to  
56  
57 380 the backlog in waiting lists caused by the COVID-19 pandemic.  
58  
59  
60

1  
2  
3 381 *Unanswered questions and future research*  
4  
5

6 382 We need to understand how the scheduling and possible outsourcing of elective surgery for  
7  
8 383 different types of patients, depending on capacity, may impact on throughput of patients, waiting  
9  
10 384 times, waiting lists, outcomes of surgery, costs, and equity of access to surgery. Inevitably  
11  
12 385 outsourcing simpler patients to the independent sector will leave more complex patients being  
13  
14 386 treated by NHS Trusts, which could have a detrimental impact on their service. An appropriate  
15  
16 387 balance would need to be achieved to maximise the benefits for patients, and research is needed to  
17  
18 388 understand what that balance is. Additionally, we need to understand whether this type of  
19  
20 389 scheduling and outsourcing is acceptable to people waiting for hip and knee surgery as well as  
21  
22 390 clinicians.  
23  
24  
25  
26

27 391 *Conclusions*  
28  
29

30 392 Declining elective capacity and seasonality has a marked effect on the provision of joint  
31  
32 393 replacement, despite efficiency improvements in hospital treatment. The Trust has outsourced less  
33  
34 394 complex patients to independent providers, and/or treated them during winter when capacity is  
35  
36 395 most limited. There is a need to explore whether these are strategies that could be used explicitly to  
37  
38 396 maximise the use of limited elective capacity, provide benefit to patients, and value for money for  
39  
40 397 taxpayers.  
41  
42  
43  
44  
45  
46

47 398

47 399 **Author Contributions**  
48  
49

50 400 This publication is the work of the authors, who serve as guarantors for the contents of this paper. TJ  
51  
52 401 contributed to study design, data cleaning, data analysis, interpretation of results and writing the  
53  
54 402 manuscript. MTR contributed to study conceptualisation, supervision, interpretation of results and  
55  
56 403 reviewing the manuscript. TK contributed to data curation, supervision, interpretation of results and  
57  
58 404 reviewing the manuscript. AE contributed to data curation, interpretation of results and reviewing  
59  
60

1  
2  
3 405 the manuscript. CP and EE contributed to interpretation of results and reviewing the manuscript. AB  
4  
5 406 contributed to study conceptualisation, supervision, interpretation of results and reviewing the  
6  
7 407 manuscript. AJ contributed to study conceptualisation and design, supervision, and writing the  
8  
9 408 manuscript. TJ had full access to the data in the study and takes responsibility for the integrity of the  
10  
11 409 data and the accuracy of the data analysis.  
12  
13  
14  
15 410

### 17 411 **Acknowledgements**

18  
19  
20 412 The study reported here would not have been possible without information provided by the NHS  
21  
22 413 Trust, and the use of their hospital admissions data via the NIHR ARC West Partnership Agreement.  
23  
24  
25  
26 414

### 27 28 415 **Funding**

29  
30  
31 416 This research was funded by Health Data Research UK (HDR UK) Better Care South-West Partnership.  
32  
33 417 EE, TJ, and MTR's time was supported by the National Institute for Health Research Applied Research  
34  
35 418 Collaboration West (NIHR ARC West). AJ and CP were supported by the NIHR Biomedical Research  
36  
37 419 Centre at University Hospitals Bristol and Weston NHS Foundation Trust and the University of Bristol.  
38  
39 420 The views expressed in this article are those of the author(s) and not necessarily those of the NHS,  
40  
41 421 the NIHR, the Department of Health and Social Care or HDR UK.  
42  
43  
44  
45  
46 422

### 47 48 423 **Ethical Approval**

49  
50  
51 424 Not applicable / No human participants included.  
52  
53  
54 425

### 55 56 426 **Data Sharing**



1  
2  
3 427 The data from the NHS Trust was obtained under the NIHR ARC West Partnership Agreement. The  
4  
5 428 agreement precludes us from sharing the raw data but it can be published and shared once  
6  
7 429 aggregated to a non-identifiable level.  
8  
9

10 430 The data from Hospital Episode Statistics (HES) was obtained under licence (DARS-NIC-17875-X7K1V)  
11  
12 431 from NHS Digital (previously the Health and Social Care Information Centre); *Copyright © 2022, re-*  
13  
14 432 *used with the permission of The Health & Social Care Information Centre. All rights reserved.* The  
15  
16 433 data are provided by patients and collected by the NHS as part of their care and support. HES data  
17  
18 434 can be accessed via NHS Digital: <https://digital.nhs.uk/services/data-access-request-service-dars>  
19  
20  
21  
22  
23  
24

435

#### 436 **Transparency**

25  
26  
27  
28 437 The manuscript's guarantor (TJ) affirms that the manuscript is an honest, accurate, and transparent  
29  
30 438 account of the study being reported; that no important aspects of the study have been omitted; and  
31  
32 439 that any discrepancies from the study as originally planned have been explained.  
33  
34  
35  
36

440

#### 441 **Competing Interests**

37  
38  
39  
40  
41 442 All authors have completed the ICMJE uniform disclosure form at [www.icmje.org/coi\\_disclosure.pdf](http://www.icmje.org/coi_disclosure.pdf)  
42  
43 443 and declare: TJ, EE, and TR had financial support from NIHR ARC West for the submitted work; AJ has  
44  
45 444 had financial support in the previous three years through institutional grants from NIHR, HDR UK,  
46  
47 445 Versus Arthritis, Healthcare Quality Improvement Partnership (HQIP), Royal College of Physicians  
48  
49 446 (RCP), and Health Foundation, had unpaid committee or leadership roles relating to musculoskeletal  
50  
51 447 conditions for NIHR, Nuffield Foundation, Warwick CTU, and Versus Arthritis, and a paid expert panel  
52  
53 448 role for Nuffield Foundation Oliver Bird Fund; no other financial relationships with any organisations  
54  
55 449 that might have an interest in the submitted work in the previous three years; no other relationships  
56  
57 450 or activities that could appear to have influenced the submitted work.  
58  
59  
60

## REFERENCES

1. Carr AJ, Robertsson O, Graves S, et al. Knee replacement. *Lancet* 2012;379(9823):1331-40. doi: 10.1016/S0140-6736(11)60752-6
2. Pivec R, Johnson AJ, Mears SC, et al. Hip arthroplasty. *Lancet* 2012;380(9855):1768-77. doi: 10.1016/S0140-6736(12)60607-2
3. Price AJ, Alvand A, Troelsen A, et al. Hip and knee replacement 2 Knee replacement. *Lancet* 2018;392(10158):1672-82. doi: Doi 10.1016/S0140-6736(18)32344-4
4. Ferguson RJ, Palmer AJ, Taylor A, et al. Hip replacement. *Lancet* 2018;392(10158):1662-71. doi: 10.1016/S0140-6736(18)31777-X [published Online First: 2018/11/30]
5. Culliford DJ, Maskell J, Beard DJ, et al. Temporal trends in hip and knee replacement in the United Kingdom 1991 TO 2006. *J Bone Joint Surg Br* 2010;92b(1):130-35. doi: 10.1302/0301-620x.92b1.22654
6. Burn E, Edwards CJ, Murray DW, et al. Trends and determinants of length of stay and hospital reimbursement following knee and hip replacement: evidence from linked primary care and NHS hospital records from 1997 to 2014. *Bmj Open* 2018;8(1) doi: 10.1136/bmjopen-2017-019146
7. Kehlet H. Fast-track hip and knee arthroplasty. *Lancet* 2013;381(9878):1600-02. doi: Doi 10.1016/S0140-6736(13)61003-X
8. Briggs T. A national review of adult elective orthopaedic services in England 2015 [Available from: <https://gettingitrightfirsttime.co.uk/wp-content/uploads/2017/06/GIRFT-National-Report-Mar15-Web.pdf>].
9. Ward D, Wenzel L. A new trend in elective hip surgery 2019 [Available from: <https://www.kingsfund.org.uk/blog/2019/06/new-trend-elective-hip-surgery>].
10. Fisher E, Merry L. Winter 2017/18: the worst ever for the NHS? 2018 [Available from: <https://www.nuffieldtrust.org.uk/news-item/winter-2017-18-the-worst-ever-for-the-nhs>].
11. BMJ. Covid-19: "Life on hold" for NHS patients needing musculoskeletal care 2021 [Available from: <https://doi.org/10.1136/bmj.n1616>].
12. Bernal JL, Cummins S, Gasparrini A. Interrupted time series regression for the evaluation of public health interventions: a tutorial. *Int J Epidemiol* 2017;46(1):348-55. doi: 10.1093/ije/dyw098
13. Kontopantelis E, Doran T, Springate DA, et al. Regression based quasi-experimental approach when randomisation is not an option: interrupted time series analysis. *Bmj-Brit Med J* 2015;350 doi: 10.1136/bmj.h2750
14. Leatherdale ST. Natural experiment methodology for research: a review of how different methods can support real-world research. *Int J Soc Res Method* 2019;22(1):19-35. doi: 10.1080/13645579.2018.1488449
15. Benchimol EI, Smeeth L, Guttman A, et al. The REporting of studies Conducted using Observational Routinely-collected health Data (RECORD) Statement. *Plos Med* 2015;12(10) doi: 10.1371/journal.pmed.1001885
16. Herbert A, Wijlaars L, Zylbersztejn A, et al. Data Resource Profile: Hospital Episode Statistics Admitted Patient Care (HES APC). *Int J Epidemiol* 2017;46(4):1093-+. doi: 10.1093/ije/dyx015
17. Quan H, Sundararajan V, Halfon P, et al. Coding algorithms for defining comorbidities in ICD-9-CM and ICD-10 administrative data. *Med Care* 2005;43(11):1130-9. doi: 10.1097/01.mlr.0000182534.19832.83 [published Online First: 2005/10/15]
18. Office for National Statistics. LSOA (2011) to Clinical Commissioning Groups to Sustainability and Transformation Partnerships (April 2021) Lookup in England 2021 [Available from: <https://geoportal.statistics.gov.uk/datasets/ons::lsoa-2011-to-clinical-commissioning->

- 1  
2  
3 501 [groups-to-sustainability-and-transformation-partnerships-april-2021-lookup-in-](#)  
4 502 [england/explore.](#)
- 5 503 19. Bhaskaran K, Gasparrini A, Hajat S, et al. Time series regression studies in environmental  
6 504 epidemiology. *Int J Epidemiol* 2013;42(4):1187-95. doi: 10.1093/ije/dyt092
- 7 505 20. Bottomley C, Scott JAG, Isham V. Analysing Interrupted Time Series with a Control. *Epidemiologic*  
8 506 *Methods* 2019;8(1) doi: 10.1515/em-2018-0010
- 9 507 21. Linden A. Combining synthetic controls and interrupted time series analysis to improve causal  
10 508 inference in program evaluation. *J Eval Clin Pract* 2018;24(2):447-53. doi: 10.1111/jep.12882
- 11 509 22. Dorward J, Khubone T, Gate K, et al. The impact of the COVID-19 lockdown on HIV care in 65  
12 510 South African primary care clinics: an interrupted time series analysis. *Lancet Hiv*  
13 511 2021;8(3):e158-e65. doi: 10.1016/S2352-3018(20)30359-3
- 14 512 23. Sutaria S, Kirkwood G, Pollock AM. An ecological study of NHS funded elective hip arthroplasties  
15 513 in England from 2003/04 to 2012/13. *J Roy Soc Med* 2019;112(7):292-303. doi:  
16 514 10.1177/0141076819851701
- 17 515 24. The Independent. NHS privatisation fears after figures show third of knee replacements done by  
18 516 private sector, 2018. Available from: [https://www.independent.co.uk/news/uk/home-](https://www.independent.co.uk/news/uk/home-news/nhs-knee-hip-replacements-private-sector-a8549006.html)  
19 517 [news/nhs-knee-hip-replacements-private-sector-a8549006.html](https://www.independent.co.uk/news/uk/home-news/nhs-knee-hip-replacements-private-sector-a8549006.html).
- 20 518 25. Dench J. Private hospital overtakes NHS for hip and knee replacement, 2021. Available from:  
21 519 [https://londonnewstime.com/private-hospital-overtakes-nhs-for-hip-and-knee-](https://londonnewstime.com/private-hospital-overtakes-nhs-for-hip-and-knee-replacement/479438/)  
22 520 [replacement/479438/](https://londonnewstime.com/private-hospital-overtakes-nhs-for-hip-and-knee-replacement/479438/).
- 23 521 26. Herrod PJJ, Adiamah A, Boyd-Carson H, et al. Winter cancellations of elective surgical procedures  
24 522 in the UK: a questionnaire survey of patients on the economic and psychological impact. *Bmj*  
25 523 *Open* 2019;9(9) doi: 10.1136/bmjopen-2018-028753
- 26 524 27. University Hospitals of Leicester NHS Trust. Impact of Emergency Activity on Planned Surgery  
27 525 Leicester, 2019. Available from:  
28 526 [https://cabinet.leicester.gov.uk/documents/s98190/HWB%20-](https://cabinet.leicester.gov.uk/documents/s98190/HWB%20-%20Emergency%20and%20the%20impact%20on%20Planned%20Surgeries.pdf)  
29 527 [%20Emergency%20and%20the%20impact%20on%20Planned%20Surgeries.pdf](https://cabinet.leicester.gov.uk/documents/s98190/HWB%20-%20Emergency%20and%20the%20impact%20on%20Planned%20Surgeries.pdf) accessed  
30 528 March 2023.
- 31 529 28. British Medical Association. Outsourced: the role of the independent sector in the NHS, 2022.  
32 530 Available from: [https://www.bma.org.uk/media/5378/bma-nhs-outsourcing-report-march-](https://www.bma.org.uk/media/5378/bma-nhs-outsourcing-report-march-2022.pdf)  
33 531 [2022.pdf](https://www.bma.org.uk/media/5378/bma-nhs-outsourcing-report-march-2022.pdf).
- 34 532 29. Pollock AM, Godden S. Independent sector treatment centres: evidence so far. *Bmj-Brit Med J*  
35 533 2008;336(7641):421-24. doi: DOI 10.1136/bmj.39470.505556.80
- 36 534 30. Cooper Z, Gibbons S, Skellern M. Does competition from private surgical centres improve public  
37 535 hospitals' performance? Evidence from the English National Health Service. *J Public Econ*  
38 536 2018;166:63-80. doi: 10.1016/j.jpubeco.2018.08.002
- 39 537 31. Goodair B, Reeves A. Outsourcing health-care services to the private sector and treatable  
40 538 mortality rates in England, 2013-20: an observational study of NHS privatisation. *Lancet*  
41 539 *Public Health* 2022;7(7):E638-E46.
- 42 540 32. Association of Surgeons in Training. Winter Pressures affecting Surgeons in Training, 2018.  
43 541 Available from: [https://www.asit.org/resources/archived-articles-documents/2018/winter-](https://www.asit.org/resources/archived-articles-documents/2018/winter-pressures-affecting-surgeons-in-training/res1289)  
44 542 [pressures-affecting-surgeons-in-training/res1289](https://www.asit.org/resources/archived-articles-documents/2018/winter-pressures-affecting-surgeons-in-training/res1289).
- 45 543 33. British Orthopaedic Association. BOA statement on Training and Winter Pressures, 2018.  
46 544 Available from: [https://www.boa.ac.uk/resources/boa-statement-on-training-and-winter-](https://www.boa.ac.uk/resources/boa-statement-on-training-and-winter-pressures.html)  
47 545 [pressures.html](https://www.boa.ac.uk/resources/boa-statement-on-training-and-winter-pressures.html).
- 48 546 34. Royal College of Surgeons. Guidance to help manage winter pressures, 2018. Available from:  
49 547 [https://www.rcseng.ac.uk/news-and-events/news/archive/guidance-to-help-manage-](https://www.rcseng.ac.uk/news-and-events/news/archive/guidance-to-help-manage-winter-pressures/)  
50 548 [winter-pressures/](https://www.rcseng.ac.uk/news-and-events/news/archive/guidance-to-help-manage-winter-pressures/).

**FIGURE CAPTIONS**

Figure 1. Elective hip (left panel) and knee (right panel) replacement admissions at the Trust  
Note: grey area shows the winter 2017 cancellations and is excluded from the analysis

Figure 2. Average age on admission for hip (left panel) and knee (right panel) replacements at the Trust  
Note: grey area shows the winter 2017 cancellations and is excluded from the analysis

Figure 3. Proportion of people having hip (left panel) and knee (right panel) replacements with 2+ Charlson comorbidities recorded  
Note: grey area shows the winter 2017 cancellations and is excluded from the analysis

Figure 4. Ratio of public to private provision of elective hip (left panel) and knee (right panel) replacements for NHS patients in the Trust CCG  
Note: grey area shows the winter 2017 cancellations and is excluded from the analysis

Figure 5. Bed occupancy for hip (left panel) and knee (right panel) replacements at the Trust  
Note: grey area shows the winter 2017 cancellations and is excluded from the analysis



Figure 1. Elective hip (left panel) and knee (right panel) replacement admissions at the Trust  
 Note: grey area shows the winter 2017 cancellations and is excluded from the analysis

301x150mm (300 x 300 DPI)

1  
2  
3  
4  
5  
6  
7  
8  
9  
10  
11  
12  
13  
14  
15  
16  
17  
18  
19  
20  
21  
22  
23  
24  
25  
26  
27  
28  
29  
30  
31  
32  
33  
34  
35  
36  
37  
38  
39  
40  
41  
42  
43  
44  
45  
46  
47  
48  
49  
50  
51  
52  
53  
54  
55  
56  
57  
58  
59  
60

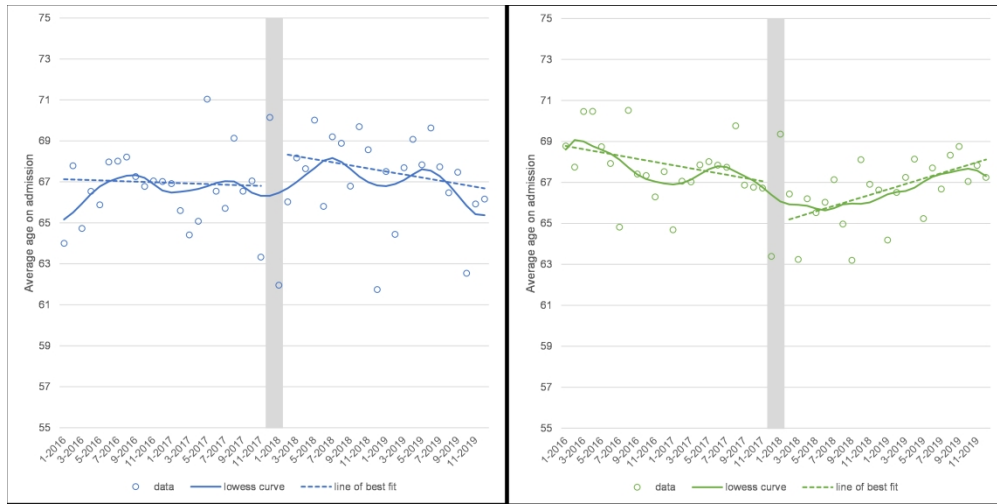

Figure 2. Average age on admission for hip (left panel) and knee (right panel) replacements at the Trust  
Note: grey area shows the winter 2017 cancellations and is excluded from the analysis

301x150mm (300 x 300 DPI)



Figure 3. Proportion of people having hip (left panel) and knee (right panel) replacements with 2+ Charlson comorbidities recorded  
 Note: grey area shows the winter 2017 cancellations and is excluded from the analysis

301x150mm (300 x 300 DPI)

1  
2  
3  
4  
5  
6  
7  
8  
9  
10  
11  
12  
13  
14  
15  
16  
17  
18  
19  
20  
21  
22  
23  
24  
25  
26  
27  
28  
29  
30  
31  
32  
33  
34  
35  
36  
37  
38  
39  
40  
41  
42  
43  
44  
45  
46  
47  
48  
49  
50  
51  
52  
53  
54  
55  
56  
57  
58  
59  
60

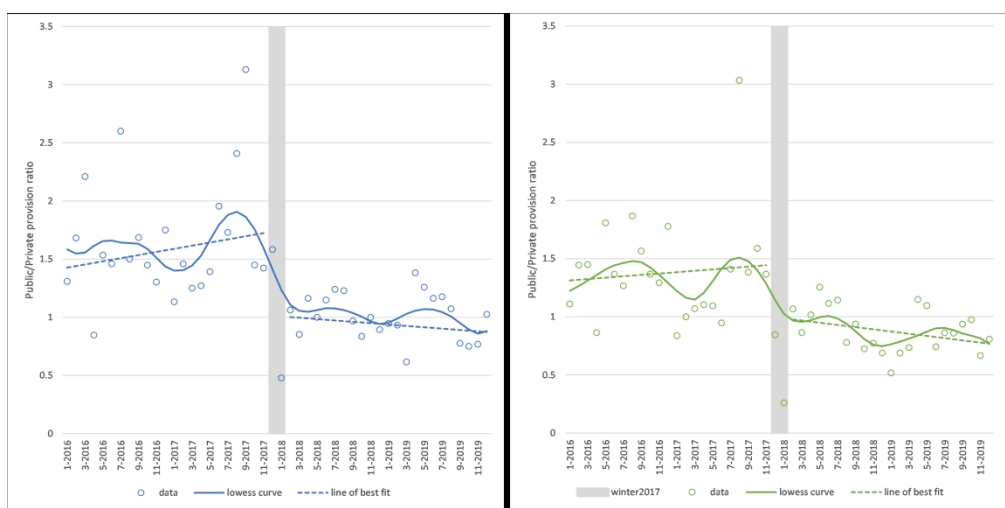

Figure 4. Ratio of public to private provision of elective hip (left panel) and knee (right panel) replacements for NHS patients in the Trust CCG  
Note: grey area shows the winter 2017 cancellations and is excluded from the analysis

301x150mm (300 x 300 DPI)





Figure 5. Bed occupancy for hip (left panel) and knee (right panel) replacements at the Trust  
 Note: grey area shows the winter 2017 cancellations and is excluded from the analysis

301x150mm (300 x 300 DPI)

Supplementary Figure F1. Ratio of elective to emergency hospital admissions for any reason at the Trust

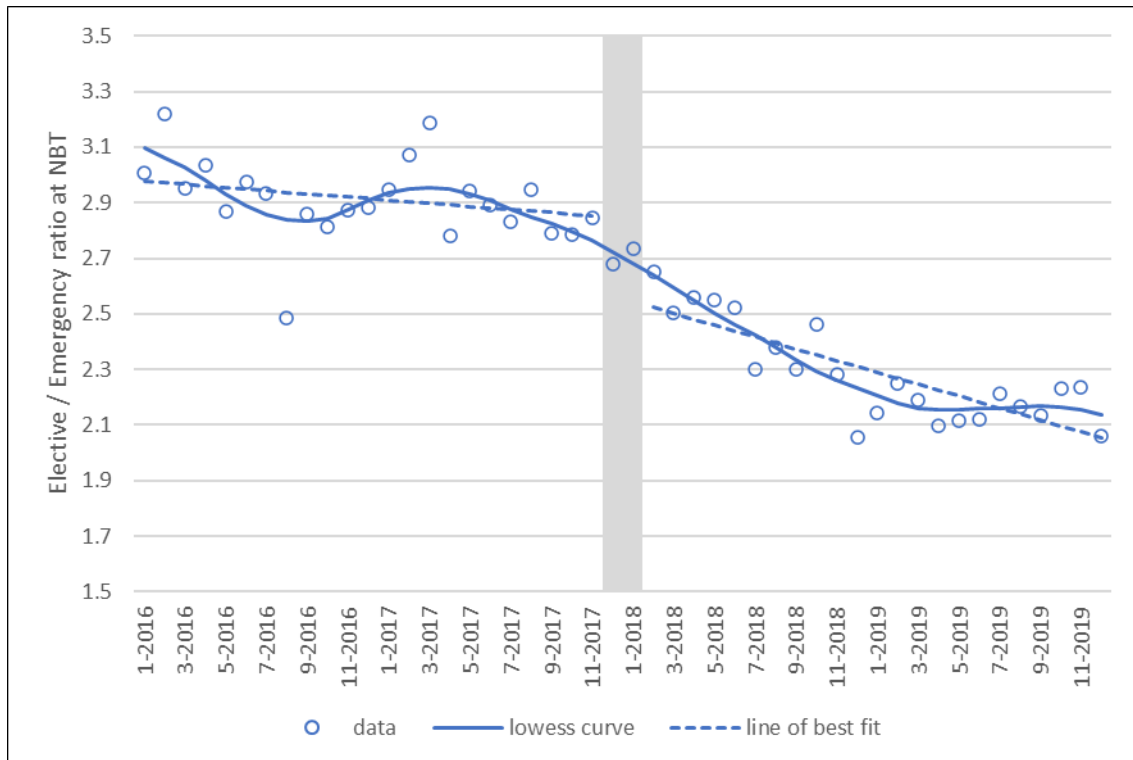

Note: grey area shows the winter 2017 cancellations and is excluded from the analysis

Supplementary Figure F2. Average length of stay for primary hip (left) and knee (right) replacement operations at NBT



Note: grey area shows the winter 2017 cancellations and is excluded from the analysis

1  
2  
3  
4  
5  
6  
7  
8  
9  
10  
11  
12  
13  
14  
15  
16  
17  
18  
19  
20  
21  
22  
23  
24  
25  
26  
27  
28  
29  
30  
31  
32  
33  
34  
35  
36  
37  
38  
39  
40  
41  
42  
43  
44  
45  
46

For peer review only

**Supplementary Table T1. OPCS-4 codes used to identify primary hip and knee replacement operations**

| <b>Category</b>                      | <b>Code</b>                                                             | <b>Description</b>                                                               | <b>Notes</b> |
|--------------------------------------|-------------------------------------------------------------------------|----------------------------------------------------------------------------------|--------------|
| <i>Primary Total Hip Replacement</i> | W37.1                                                                   | Primary total prosthetic replacement of hip joint using cement                   |              |
|                                      | W37.8                                                                   | Other specified total prosthetic replacement of hip joint using cement           |              |
|                                      | W37.9                                                                   | Unspecified total prosthetic replacement of hip joint using cement               |              |
|                                      | W38.1                                                                   | Primary total prosthetic replacement of hip joint not using cement               |              |
|                                      | W38.8                                                                   | Other specified total prosthetic replacement of hip joint not using cement       |              |
|                                      | W38.9                                                                   | Unspecified total prosthetic replacement of hip joint not using cement           |              |
|                                      | W39.1                                                                   | Primary total prosthetic replacement of hip joint NEC                            |              |
|                                      | W39.8                                                                   | Other specified other total prosthetic replacement of hip joint                  |              |
|                                      | W39.9                                                                   | Unspecified other total prosthetic replacement of hip joint                      |              |
|                                      | W43.1                                                                   | Primary total prosthetic replacement of other joint using cement NEC             |              |
|                                      | W43.8                                                                   | Other specified total prosthetic replacement of other joint using cement NEC     |              |
|                                      | W43.9                                                                   | Unspecified total prosthetic replacement of other joint using cement NEC         |              |
|                                      | W44.1                                                                   | Primary total prosthetic replacement of other joint not using cement NEC         |              |
|                                      | W44.8                                                                   | Other specified total prosthetic replacement of other joint not using cement NEC |              |
|                                      | W44.9                                                                   | Unspecified total prosthetic replacement of other joint not using cement NEC     |              |
| W45.1                                | Other primary total prosthetic replacement of other joint NEC           |                                                                                  |              |
| W45.8                                | Other specified total prosthetic replacement of other joint NEC         |                                                                                  |              |
| W45.9                                | Unspecified total prosthetic replacement of other joint NEC             |                                                                                  |              |
| W52.1                                | Primary prosthetic replacement of articulation of bone using cement NEC |                                                                                  |              |

- 1  
2  
3 W52.8 Other specified prosthetic replacement of articulation of bone using  
4 cement NEC  
5  
6 W52.9 Unspecified prosthetic replacement of articulation of bone using  
7 cement NEC  
8  
9 W53.1 Primary prosthetic replacement of articulation of bone not using  
10 cement NEC  
11  
12 W53.8 Other specified prosthetic replacement of articulation of bone not  
13 using cement NEC  
14  
15 W53.9 Unspecified prosthetic replacement of articulation of bone not using  
16 cement NEC  
17  
18 W54.1 Primary prosthetic replacement of articulation of bone NEC  
19  
20 W54.8 Other specified prosthetic replacement of articulation of bone NEC  
21  
22 W54.9 Unspecified prosthetic replacement of articulation of bone NEC  
23  
24 W93.1 Primary hybrid prosthetic replacement of hip joint using cemented  
25 acetabular component  
26  
27 W93.8 Other specified hybrid prosthetic replacement of hip joint using  
28 cemented acetabular component  
29  
30 W93.9 Unspecified hybrid prosthetic replacement of hip joint using cemented  
31 acetabular component  
32  
33 W94.1 Primary hybrid prosthetic replacement of hip joint using cemented  
34 femoral component  
35  
36 W94.8 Other specified hybrid prosthetic replacement of hip joint using  
37 cemented femoral component  
38  
39 W94.9 Unspecified hybrid prosthetic replacement of hip joint using cemented  
40 femoral component  
41  
42 W95.1 Primary hybrid prosthetic replacement of hip joint using cement NEC  
43  
44 W95.8 Other specified hybrid prosthetic replacement of hip joint using  
45 cement  
46  
47 W95.9 Unspecified hybrid prosthetic replacement of hip joint using cement
-

|    |                                     |       |                                                                                   |
|----|-------------------------------------|-------|-----------------------------------------------------------------------------------|
| 1  |                                     |       |                                                                                   |
| 2  |                                     |       |                                                                                   |
| 3  | <i>Primary Total Knee</i>           | W40.1 | Primary total prosthetic replacement of knee joint using cement                   |
| 4  | <i>Replacement</i>                  |       |                                                                                   |
| 5  |                                     |       |                                                                                   |
| 6  |                                     | W40.8 | Other specified total prosthetic replacement of knee joint using cement           |
| 7  |                                     |       |                                                                                   |
| 8  |                                     | W40.9 | Unspecified total prosthetic replacement of knee joint using cement               |
| 9  |                                     | W41.1 | Primary total prosthetic replacement of knee joint not using cement               |
| 10 |                                     |       |                                                                                   |
| 11 |                                     | W41.8 | Other specified total prosthetic replacement of knee joint not using cement       |
| 12 |                                     |       |                                                                                   |
| 13 |                                     | W41.9 | Unspecified total prosthetic replacement of knee joint not using cement           |
| 14 |                                     |       |                                                                                   |
| 15 |                                     | W42.1 | Primary total prosthetic replacement of knee joint NEC                            |
| 16 |                                     | W42.8 | Other specified other total prosthetic replacement of knee joint                  |
| 17 |                                     | W42.9 | Unspecified other total prosthetic replacement of knee joint                      |
| 18 |                                     | O18.1 | Primary hybrid prosthetic replacement of knee joint using cement                  |
| 19 |                                     | O18.8 | Other specified hybrid prosthetic replacement of knee joint using cement          |
| 20 |                                     |       |                                                                                   |
| 21 |                                     | O18.9 | Unspecified hybrid prosthetic replacement of knee joint using cement              |
| 22 |                                     |       |                                                                                   |
| 23 | <i>Resurfacing / Reconstruction</i> | W58.1 | Primary resurfacing arthroplasty of joint                                         |
| 24 |                                     |       | Require combination with site + combination codes to ID                           |
| 25 |                                     | W58.8 | Other specified reconstruction of joint                                           |
| 26 |                                     |       | Require combination with site + combination codes to ID                           |
| 27 |                                     |       |                                                                                   |
| 28 |                                     | W58.9 | Unspecified other reconstruction of joint                                         |
| 29 |                                     |       | Require combination with site + combination codes to ID                           |
| 30 |                                     |       |                                                                                   |
| 31 | <i>Primary unicondylar /</i>        | W52.1 | Primary prosthetic replacement of articulation of bone using cement               |
| 32 | <i>unicompartmental knee</i>        |       | Require combination with site + combination codes to ID                           |
| 33 | <i>operations</i>                   | W52.8 | Other specified prosthetic replacement of articulation of other bone using cement |
| 34 |                                     |       | Require combination with site + combination codes to ID                           |
| 35 |                                     |       |                                                                                   |
| 36 |                                     | W52.9 | Unspecified prosthetic replacement of articulation of other bone using cement     |
| 37 |                                     |       | Require combination with site + combination codes to ID                           |
| 38 |                                     | W53.1 | Primary prosthetic replacement of articulation of bone not using cement NEC       |
| 39 |                                     |       | Require combination with site + combination codes to ID                           |
| 40 |                                     |       |                                                                                   |
| 41 |                                     |       |                                                                                   |
| 42 |                                     |       |                                                                                   |
| 43 |                                     |       |                                                                                   |
| 44 |                                     |       |                                                                                   |
| 45 |                                     |       |                                                                                   |
| 46 |                                     |       |                                                                                   |

1  
2  
3  
4  
5  
6  
7  
8  
9  
10  
11  
12  
13  
14  
15  
16  
17  
18  
19  
20  
21  
22  
23  
24  
25  
26  
27  
28  
29  
30  
31  
32  
33  
34  
35  
36  
37  
38  
39  
40  
41  
42  
43  
44  
45  
46

|       |                                                                                   |                                                         |
|-------|-----------------------------------------------------------------------------------|---------------------------------------------------------|
| W53.9 | Unspecified prosthetic replacement of articulation of other bone not using cement | Require combination with site + combination codes to ID |
| W54.0 | Conversion from previous prosthetic replacement of articulation of bone NEC       | Require combination with site + combination codes to ID |
| W54.1 | Primary prosthetic replacement of articulation of bone NEC                        | Require combination with site + combination codes to ID |
| W54.8 | Other specified other prosthetic replacement of articulation of other bone        | Require combination with site + combination codes to ID |
| W54.9 | Unspecified other prosthetic replacement of articulation of other bone            | Require combination with site + combination codes to ID |

---

For peer review only



**Supplementary Table T2. Interrupted time series model results with maximum auto-correlation lag 2**

|                            | pre-trend             |       | level change           |       | trend change           |       | spring                |       | summer                 |       | autumn                |       |
|----------------------------|-----------------------|-------|------------------------|-------|------------------------|-------|-----------------------|-------|------------------------|-------|-----------------------|-------|
|                            | estimate (95% CI)     | p     | estimate (95% CI)      | p     | estimate (95% CI)      | p     | estimate (95% CI)     | p     | estimate (95% CI)      | p     | estimate (95% CI)     | p     |
| Hip Admissions             | 0.995 (0.986,1.004)   | 0.300 | 1.055 (0.912,1.221)    | 0.469 | 0.991 (0.977,1.006)    | 0.239 | 1.19 (1.034,1.37)     | 0.015 | 1.207 (1.094,1.332)    | 0.000 | 1.101 (0.982,1.234)   | 0.099 |
| Hip Average Age            | -0.015 (-0.102,0.072) | 0.737 | 1.571 (-0.1,3.242)     | 0.065 | -0.06 (-0.175,0.055)   | 0.307 | 1.52 (-0.07,3.111)    | 0.061 | 2.09 (0.811,3.368)     | 0.001 | 1.031 (-0.598,2.66)   | 0.215 |
| Hip Prop Women             | 0.999 (0.995,1.003)   | 0.582 | 0.966 (0.861,1.083)    | 0.549 | 1.007 (0.999,1.016)    | 0.089 | 1.023 (0.941,1.111)   | 0.596 | 1.088 (1.001,1.183)    | 0.048 | 0.981 (0.888,1.083)   | 0.700 |
| Hip Prop 2+ Charlson       | 0.994 (0.982,1.007)   | 0.380 | 1.411 (1.064,1.873)    | 0.017 | 1.01 (0.994,1.027)     | 0.220 | 1.195 (0.982,1.455)   | 0.075 | 1.306 (1.096,1.557)    | 0.003 | 1.003 (0.788,1.276)   | 0.982 |
| Hip Prop High Deprivation  | 1.003 (0.993,1.013)   | 0.587 | 1.027 (0.869,1.214)    | 0.754 | 1.004 (0.986,1.022)    | 0.660 | 0.937 (0.815,1.076)   | 0.358 | 0.877 (0.752,1.022)    | 0.093 | 0.996 (0.84,1.18)     | 0.963 |
| Hip LoS                    | -0.006 (-0.034,0.021) | 0.660 | 0.312 (-0.193,0.818)   | 0.225 | -0.014 (-0.047,0.02)   | 0.425 | 0.502 (0.214,0.79)    | 0.001 | 0.135 (-0.194,0.463)   | 0.422 | 0.1 (-0.288,0.488)    | 0.613 |
| Hip LoS Age 16-59          | -0.003 (-0.028,0.021) | 0.788 | 0.379 (-0.094,0.851)   | 0.116 | -0.026 (-0.065,0.013)  | 0.190 | 0.223 (-0.156,0.602)  | 0.249 | 0.384 (0.065,0.703)    | 0.018 | 0.219 (-0.183,0.622)  | 0.285 |
| Hip LoS Age 60-69          | -0.004 (-0.034,0.026) | 0.818 | 0.013 (-0.807,0.832)   | 0.976 | 0 (-0.053,0.052)       | 0.988 | 0.107 (-0.44,0.654)   | 0.702 | 0.158 (-0.468,0.783)   | 0.621 | 0.162 (-0.487,0.811)  | 0.625 |
| Hip LoS Age 70-79          | 0.006 (-0.058,0.069)  | 0.862 | -0.753 (-2.003,0.497)  | 0.238 | 0.007 (-0.06,0.073)    | 0.847 | -0.433 (-1.416,0.549) | 0.387 | -0.842 (-1.93,0.246)   | 0.129 | -0.865 (-1.991,0.262) | 0.132 |
| Hip LoS Age 80+            | -0.068 (-0.171,0.036) | 0.199 | 2.109 (0.683,3.535)    | 0.004 | -0.002 (-0.128,0.123)  | 0.971 | 1.506 (0.515,2.497)   | 0.003 | 0.222 (-0.773,1.217)   | 0.662 | 1.003 (-0.229,2.235)  | 0.111 |
| Hip LoS Men                | -0.007 (-0.055,0.041) | 0.776 | 0.347 (-0.583,1.278)   | 0.464 | -0.02 (-0.083,0.043)   | 0.536 | 0.293 (-0.126,0.712)  | 0.170 | 0.289 (-0.196,0.774)   | 0.243 | 0.458 (-0.111,1.026)  | 0.114 |
| Hip LoS Women              | -0.004 (-0.041,0.033) | 0.842 | 0.235 (-0.308,0.778)   | 0.396 | -0.014 (-0.055,0.027)  | 0.505 | 0.693 (0.309,1.077)   | 0.000 | 0.009 (-0.428,0.446)   | 0.966 | -0.203 (-0.728,0.323) | 0.449 |
| Hip LoS Charlson 0         | -0.011 (-0.042,0.019) | 0.469 | 0.297 (-0.288,0.882)   | 0.319 | -0.005 (-0.042,0.031)  | 0.782 | 0.912 (0.549,1.276)   | 0.000 | 0.178 (-0.148,0.503)   | 0.285 | 0.222 (-0.065,0.509)  | 0.129 |
| Hip LoS Charlson 1         | 0.034 (-0.012,0.08)   | 0.146 | 0.238 (-0.709,1.184)   | 0.623 | -0.077 (-0.145,-0.01)  | 0.024 | 0.191 (-0.418,0.801)  | 0.538 | 0.312 (-0.405,1.029)   | 0.393 | 0.014 (-0.578,0.606)  | 0.963 |
| Hip LoS Charlson 2+        | -0.123 (-0.259,0.013) | 0.077 | 0.172 (-2.224,2.569)   | 0.888 | 0.116 (-0.016,0.249)   | 0.085 | -0.789 (-2.141,0.563) | 0.253 | -0.783 (-2.087,0.521)  | 0.239 | 0.188 (-2.051,2.427)  | 0.869 |
| Hip LoS Dep 1              | 0.004 (-0.032,0.04)   | 0.829 | 0.553 (-0.391,1.496)   | 0.251 | -0.017 (-0.068,0.035)  | 0.529 | 0.784 (0.107,1.462)   | 0.023 | 0.42 (-0.024,0.863)    | 0.064 | 0.299 (-0.358,0.956)  | 0.373 |
| Hip LoS Dep 2              | -0.038 (-0.083,0.006) | 0.092 | 0.822 (-0.392,2.035)   | 0.184 | -0.015 (-0.086,0.055)  | 0.670 | 1.509 (0.759,2.258)   | 0.000 | 0.66 (-0.246,1.567)    | 0.154 | 0.589 (-0.417,1.594)  | 0.251 |
| Hip LoS Dep 3              | -0.034 (-0.107,0.038) | 0.353 | 0.617 (-0.897,2.131)   | 0.424 | 0.01 (-0.076,0.095)    | 0.827 | -0.216 (-1.224,0.792) | 0.675 | -0.424 (-1.378,0.53)   | 0.384 | -0.701 (-1.536,0.135) | 0.100 |
| Hip LoS Dep 4              | 0.081 (-0.005,0.166)  | 0.064 | -0.473 (-2.181,1.236)  | 0.588 | -0.112 (-0.215,-0.009) | 0.034 | -0.374 (-1.65,0.903)  | 0.566 | -1.204 (-2.351,-0.057) | 0.040 | -0.491 (-1.918,0.935) | 0.500 |
| Hip LoS Dep 5              | 0.015 (-0.086,0.116)  | 0.773 | -0.72 (-2.059,0.62)    | 0.292 | 0 (-0.098,0.099)       | 0.999 | 0.621 (-0.084,1.327)  | 0.084 | 0.689 (-0.31,1.689)    | 0.176 | 0.816 (-0.784,2.416)  | 0.317 |
| Hip Bed Occ                | 0.997 (0.987,1.008)   | 0.643 | 1 (0.844,1.186)        | 0.997 | 0.987 (0.97,1.005)     | 0.149 | 1.291 (1.11,1.501)    | 0.001 | 1.283 (1.125,1.463)    | 0.000 | 1.146 (0.988,1.328)   | 0.071 |
| Hip Public Private         | 0.013 (-0.015,0.041)  | 0.377 | -0.741 (-1.237,-0.245) | 0.003 | -0.019 (-0.05,0.011)   | 0.218 | -0.008 (-0.212,0.196) | 0.939 | 0.308 (0.154,0.463)    | 0.000 | 0.038 (-0.166,0.241)  | 0.718 |
| Knee Admissions            | 0.995 (0.99,1.001)    | 0.106 | 0.843 (0.728,0.976)    | 0.022 | 1.005 (0.996,1.014)    | 0.256 | 1.308 (1.157,1.479)   | 0.000 | 1.26 (1.138,1.396)     | 0.000 | 1.286 (1.164,1.42)    | 0.000 |
| Knee Average Age           | -0.078 (-0.157,0.001) | 0.054 | -1.632 (-2.988,-0.276) | 0.018 | 0.211 (0.117,0.305)    | 0.000 | 0.926 (-0.112,1.965)  | 0.080 | 0.953 (-0.021,1.927)   | 0.055 | 0.354 (-0.531,1.24)   | 0.433 |
| Knee Prop Women            | 1.004 (0.998,1.01)    | 0.150 | 0.96 (0.85,1.084)      | 0.513 | 0.994 (0.986,1.003)    | 0.193 | 1.037 (0.963,1.117)   | 0.336 | 1.017 (0.924,1.118)    | 0.735 | 1.036 (0.958,1.12)    | 0.375 |
| Knee Prop 2+ Charlson      | 1.009 (0.993,1.026)   | 0.249 | 0.638 (0.455,0.894)    | 0.009 | 1.042 (1.017,1.067)    | 0.001 | 1.156 (0.911,1.467)   | 0.234 | 1.074 (0.849,1.359)    | 0.551 | 0.909 (0.628,1.315)   | 0.612 |
| Knee Prop High Deprivation | 1.005 (0.997,1.013)   | 0.189 | 0.968 (0.786,1.191)    | 0.758 | 0.986 (0.974,0.998)    | 0.021 | 1.224 (1.077,1.39)    | 0.002 | 1.075 (0.942,1.227)    | 0.282 | 1.031 (0.902,1.178)   | 0.656 |
| Knee LoS                   | -0.024 (-0.049,0.001) | 0.058 | 0.176 (-0.279,0.63)    | 0.449 | -0.008 (-0.036,0.02)   | 0.566 | 0.422 (0.073,0.771)   | 0.018 | 0.15 (-0.166,0.467)    | 0.352 | 0.396 (0.015,0.777)   | 0.042 |

1  
2  
3  
4  
5  
6  
7  
8  
9  
10  
11  
12  
13  
14  
15  
16  
17  
18  
19  
20  
21  
22  
23  
24  
25  
26  
27  
28  
29  
30  
31  
32  
33  
34  
35  
36  
37  
38  
39  
40  
41  
42  
43  
44  
45  
46

|                      |                        |       |                        |       |                        |       |                       |       |                       |       |                        |       |
|----------------------|------------------------|-------|------------------------|-------|------------------------|-------|-----------------------|-------|-----------------------|-------|------------------------|-------|
| Knee LoS Age 16-59   | -0.016 (-0.037,0.006)  | 0.151 | 0.403 (-0.045,0.852)   | 0.078 | -0.028 (-0.06,0.005)   | 0.096 | 0.484 (0.13,0.839)    | 0.007 | 0.422 (-0.021,0.866)  | 0.062 | 0.475 (0.19,0.76)      | 0.001 |
| Knee LoS Age 16-59   | 0.007 (-0.028,0.043)   | 0.684 | -0.295 (-1.015,0.426)  | 0.423 | -0.026 (-0.072,0.02)   | 0.262 | 0.069 (-0.46,0.599)   | 0.797 | -0.194 (-0.687,0.3)   | 0.441 | -0.096 (-0.725,0.532)  | 0.764 |
| Knee LoS Age 70-79   | -0.009 (-0.057,0.038)  | 0.705 | 0.77 (0.002,1.538)     | 0.049 | -0.054 (-0.11,0.003)   | 0.061 | -0.086 (-0.715,0.542) | 0.787 | -0.552 (-1.163,0.059) | 0.077 | 0.367 (-0.352,1.085)   | 0.317 |
| Knee LoS Age 80+     | -0.051 (-0.118,0.015)  | 0.131 | -0.562 (-2.298,1.173)  | 0.525 | 0.028 (-0.081,0.137)   | 0.612 | 1.521 (0.03,3.011)    | 0.046 | 1.37 (0.169,2.57)     | 0.025 | 1.361 (0.496,2.227)    | 0.002 |
| Knee LoS Men         | -0.007 (-0.031,0.018)  | 0.581 | 0.096 (-0.405,0.597)   | 0.708 | -0.033 (-0.068,0.002)  | 0.064 | 0.082 (-0.367,0.531)  | 0.720 | 0.157 (-0.262,0.575)  | 0.464 | 0.205 (-0.221,0.631)   | 0.346 |
| Knee LoS Women       | -0.042 (-0.084,0)      | 0.052 | 0.252 (-0.461,0.966)   | 0.488 | 0.017 (-0.029,0.063)   | 0.478 | 0.635 (0.048,1.223)   | 0.034 | 0.15 (-0.397,0.698)   | 0.590 | 0.49 (-0.17,1.151)     | 0.146 |
| Knee LoS Charlson 0  | -0.021 (-0.046,0.004)  | 0.095 | 0.067 (-0.362,0.495)   | 0.760 | -0.011 (-0.045,0.024)  | 0.545 | 0.645 (0.334,0.956)   | 0.000 | 0.193 (-0.111,0.497)  | 0.213 | 0.415 (0.069,0.76)     | 0.019 |
| Knee LoS Charlson 1  | -0.03 (-0.074,0.015)   | 0.191 | 0.47 (-0.391,1.331)    | 0.284 | -0.029 (-0.083,0.025)  | 0.298 | 0.455 (-0.043,0.953)  | 0.073 | 0.324 (-0.297,0.945)  | 0.307 | 1.058 (0.367,1.748)    | 0.003 |
| Knee LoS Charlson 2+ | -0.04 (-0.107,0.028)   | 0.247 | 0.407 (-2.28,3.095)    | 0.766 | -0.022 (-0.196,0.151)  | 0.802 | -0.627 (-1.698,0.443) | 0.251 | -0.949 (-2.342,0.444) | 0.182 | -1.433 (-2.229,-0.637) | 0.000 |
| Knee LoS Dep 1       | -0.009 (-0.06,0.041)   | 0.712 | -0.035 (-0.726,0.656)  | 0.920 | -0.008 (-0.073,0.056)  | 0.800 | 0.257 (-0.47,0.985)   | 0.488 | 0.096 (-0.619,0.811)  | 0.793 | -0.127 (-0.725,0.472)  | 0.678 |
| Knee LoS Dep 2       | -0.019 (-0.06,0.022)   | 0.358 | 0.199 (-0.699,1.097)   | 0.664 | -0.043 (-0.098,0.012)  | 0.124 | 0.018 (-0.776,0.812)  | 0.965 | -0.731 (-1.49,0.029)  | 0.059 | 0.05 (-0.822,0.922)    | 0.911 |
| Knee LoS Dep 3       | 0.014 (-0.036,0.064)   | 0.586 | -0.426 (-1.355,0.503)  | 0.369 | -0.036 (-0.106,0.033)  | 0.302 | 0.976 (0.061,1.892)   | 0.036 | 0.909 (-0.034,1.852)  | 0.059 | 0.547 (-0.217,1.312)   | 0.160 |
| Knee LoS Dep 4       | -0.064 (-0.123,-0.004) | 0.035 | 0.634 (-0.293,1.56)    | 0.180 | 0.033 (-0.039,0.105)   | 0.373 | 0.669 (-0.187,1.525)  | 0.126 | 0.617 (0.02,1.214)    | 0.043 | 0.852 (-0.208,1.912)   | 0.115 |
| Knee LoS Dep 5       | -0.035 (-0.09,0.021)   | 0.224 | 0.709 (-0.303,1.721)   | 0.170 | 0.015 (-0.046,0.076)   | 0.628 | 0.123 (-0.73,0.976)   | 0.778 | -0.387 (-1.281,0.507) | 0.397 | 1.104 (0.077,2.131)    | 0.035 |
| Knee Bed Occ         | 0.993 (0.984,1.002)    | 0.103 | 0.834 (0.704,0.989)    | 0.037 | 1 (0.989,1.011)        | 0.993 | 1.42 (1.297,1.556)    | 0.000 | 1.373 (1.218,1.547)   | 0.000 | 1.465 (1.312,1.635)    | 0.000 |
| Knee Public Private  | 0.006 (-0.02,0.031)    | 0.667 | -0.476 (-1.026,0.074)  | 0.090 | -0.015 (-0.04,0.009)   | 0.225 | 0.113 (-0.089,0.314)  | 0.274 | 0.276 (0.035,0.517)   | 0.025 | 0.131 (-0.071,0.332)   | 0.205 |
| Elec Emerg Ratio     | -0.005 (-0.013,0.002)  | 0.171 | -0.322 (-0.446,-0.198) | 0.000 | -0.016 (-0.026,-0.005) | 0.003 | -0.008 (-0.12,0.103)  | 0.886 | -0.053 (-0.182,0.077) | 0.424 | -0.028 (-0.151,0.096)  | 0.661 |

Supplementary Table T3. Interrupted time series model results with maximum auto-correlation lag 0

|                            | pre-trend             |       | level change           |       | trend change          |       | spring                |       | summer                |       | autumn                |       |
|----------------------------|-----------------------|-------|------------------------|-------|-----------------------|-------|-----------------------|-------|-----------------------|-------|-----------------------|-------|
|                            | estimate (95% CI)     | p     | estimate (95% CI)      | p     | estimate (95% CI)     | p     | estimate (95% CI)     | p     | estimate (95% CI)     | p     | estimate (95% CI)     | p     |
| Hip Admissions             | 0.995 (0.985,1.005)   | 0.323 | 1.055 (0.902,1.235)    | 0.503 | 0.991 (0.978,1.005)   | 0.220 | 1.19 (1.036,1.367)    | 0.014 | 1.207 (1.088,1.339)   | 0.000 | 1.101 (0.983,1.234)   | 0.098 |
| Hip Average Age            | -0.015 (-0.134,0.104) | 0.806 | 1.571 (-0.863,4.004)   | 0.206 | -0.06 (-0.208,0.088)  | 0.427 | 1.52 (-0.079,3.119)   | 0.062 | 2.09 (0.685,3.494)    | 0.004 | 1.031 (-0.505,2.567)  | 0.188 |
| Hip Prop Women             | 0.999 (0.993,1.004)   | 0.674 | 0.966 (0.826,1.13)     | 0.662 | 1.007 (0.997,1.017)   | 0.158 | 1.023 (0.937,1.116)   | 0.617 | 1.088 (0.995,1.189)   | 0.064 | 0.981 (0.878,1.096)   | 0.730 |
| Hip Prop 2+ Charlson       | 0.994 (0.98,1.009)    | 0.455 | 1.411 (0.969,2.055)    | 0.072 | 1.01 (0.989,1.031)    | 0.344 | 1.195 (0.971,1.471)   | 0.092 | 1.306 (1.043,1.637)   | 0.020 | 1.003 (0.734,1.37)    | 0.986 |
| Hip Prop High Deprivation  | 1.003 (0.991,1.014)   | 0.631 | 1.027 (0.846,1.247)    | 0.787 | 1.004 (0.983,1.025)   | 0.704 | 0.937 (0.819,1.072)   | 0.342 | 0.877 (0.746,1.03)    | 0.110 | 0.996 (0.831,1.193)   | 0.965 |
| Hip LoS                    | -0.006 (-0.038,0.026) | 0.704 | 0.312 (-0.262,0.887)   | 0.287 | -0.014 (-0.058,0.03)  | 0.542 | 0.502 (0.132,0.872)   | 0.008 | 0.135 (-0.292,0.562)  | 0.537 | 0.1 (-0.287,0.487)    | 0.612 |
| Hip LoS Age 16-59          | -0.003 (-0.033,0.026) | 0.821 | 0.379 (-0.165,0.922)   | 0.172 | -0.026 (-0.067,0.015) | 0.210 | 0.223 (-0.17,0.617)   | 0.266 | 0.384 (0.053,0.715)   | 0.023 | 0.219 (-0.168,0.607)  | 0.267 |
| Hip LoS Age 60-69          | -0.004 (-0.046,0.039) | 0.871 | 0.013 (-1.026,1.052)   | 0.981 | 0 (-0.069,0.068)      | 0.990 | 0.107 (-0.592,0.805)  | 0.765 | 0.158 (-0.514,0.829)  | 0.645 | 0.162 (-0.588,0.912)  | 0.672 |
| Hip LoS Age 70-79          | 0.006 (-0.067,0.078)  | 0.879 | -0.753 (-2.031,0.525)  | 0.248 | 0.007 (-0.069,0.082)  | 0.865 | -0.433 (-1.583,0.716) | 0.460 | -0.842 (-2.028,0.344) | 0.164 | -0.865 (-2.164,0.435) | 0.192 |
| Hip LoS Age 80+            | -0.068 (-0.193,0.058) | 0.291 | 2.109 (0.536,3.682)    | 0.009 | -0.002 (-0.16,0.155)  | 0.977 | 1.506 (-0.007,3.018)  | 0.051 | 0.222 (-1.036,1.48)   | 0.729 | 1.003 (-0.375,2.38)   | 0.154 |
| Hip LoS Men                | -0.007 (-0.056,0.042) | 0.783 | 0.347 (-0.58,1.275)    | 0.463 | -0.02 (-0.084,0.044)  | 0.543 | 0.293 (-0.283,0.87)   | 0.319 | 0.289 (-0.314,0.892)  | 0.347 | 0.458 (-0.15,1.066)   | 0.140 |
| Hip LoS Women              | -0.004 (-0.048,0.041) | 0.868 | 0.235 (-0.563,1.033)   | 0.564 | -0.014 (-0.071,0.043) | 0.634 | 0.693 (0.164,1.222)   | 0.010 | 0.009 (-0.543,0.562)  | 0.973 | -0.203 (-0.727,0.322) | 0.448 |
| Hip LoS Charlson 0         | -0.011 (-0.047,0.024) | 0.532 | 0.297 (-0.428,1.023)   | 0.422 | -0.005 (-0.049,0.039) | 0.817 | 0.912 (0.522,1.302)   | 0.000 | 0.178 (-0.232,0.587)  | 0.396 | 0.222 (-0.135,0.579)  | 0.223 |
| Hip LoS Charlson 1         | 0.034 (-0.023,0.091)  | 0.240 | 0.238 (-0.704,1.179)   | 0.621 | -0.077 (-0.157,0.002) | 0.056 | 0.191 (-0.562,0.945)  | 0.619 | 0.312 (-0.397,1.022)  | 0.388 | 0.014 (-0.544,0.572)  | 0.960 |
| Hip LoS Charlson 2+        | -0.123 (-0.266,0.02)  | 0.092 | 0.172 (-2.155,2.5)     | 0.885 | 0.116 (-0.04,0.273)   | 0.144 | -0.789 (-2.218,0.64)  | 0.279 | -0.783 (-2.108,0.541) | 0.246 | 0.188 (-1.779,2.156)  | 0.851 |
| Hip LoS Dep 1              | 0.004 (-0.039,0.047)  | 0.857 | 0.553 (-0.509,1.614)   | 0.307 | -0.017 (-0.078,0.045) | 0.599 | 0.784 (0.118,1.451)   | 0.021 | 0.42 (-0.084,0.923)   | 0.102 | 0.299 (-0.356,0.954)  | 0.371 |
| Hip LoS Dep 2              | -0.038 (-0.087,0.01)  | 0.124 | 0.822 (-0.528,2.172)   | 0.233 | -0.015 (-0.103,0.072) | 0.730 | 1.509 (0.797,2.22)    | 0.000 | 0.66 (-0.225,1.546)   | 0.144 | 0.589 (-0.26,1.437)   | 0.174 |
| Hip LoS Dep 3              | -0.034 (-0.096,0.027) | 0.275 | 0.617 (-1.066,2.3)     | 0.472 | 0.01 (-0.09,0.109)    | 0.851 | -0.216 (-1.343,0.912) | 0.708 | -0.424 (-1.475,0.627) | 0.429 | -0.701 (-1.667,0.266) | 0.155 |
| Hip LoS Dep 4              | 0.081 (-0.023,0.185)  | 0.129 | -0.473 (-2.643,1.698)  | 0.670 | -0.112 (-0.258,0.034) | 0.134 | -0.374 (-1.695,0.947) | 0.579 | -1.204 (-2.409,0.001) | 0.050 | -0.491 (-1.978,0.995) | 0.517 |
| Hip LoS Dep 5              | 0.015 (-0.112,0.142)  | 0.819 | -0.72 (-2.66,1.221)    | 0.467 | 0 (-0.135,0.135)      | 0.999 | 0.621 (-0.412,1.655)  | 0.239 | 0.689 (-0.485,1.864)  | 0.250 | 0.816 (-0.891,2.524)  | 0.349 |
| Hip Bed Occ                | 0.997 (0.987,1.009)   | 0.653 | 1 (0.824,1.215)        | 0.997 | 0.987 (0.972,1.002)   | 0.097 | 1.291 (1.125,1.48)    | 0.000 | 1.283 (1.129,1.458)   | 0.000 | 1.146 (0.984,1.334)   | 0.080 |
| Hip Public Private         | 0.013 (-0.015,0.041)  | 0.377 | -0.741 (-1.237,-0.245) | 0.003 | -0.019 (-0.05,0.011)  | 0.218 | -0.008 (-0.212,0.196) | 0.939 | 0.308 (0.154,0.463)   | 0.000 | 0.038 (-0.166,0.241)  | 0.718 |
| Knee Admissions            | 0.995 (0.987,1.004)   | 0.274 | 0.843 (0.702,1.013)    | 0.068 | 1.005 (0.993,1.017)   | 0.422 | 1.308 (1.154,1.483)   | 0.000 | 1.26 (1.114,1.426)    | 0.000 | 1.286 (1.147,1.441)   | 0.000 |
| Knee Average Age           | -0.078 (-0.157,0.001) | 0.053 | -1.632 (-3.299,0.035)  | 0.055 | 0.211 (0.102,0.32)    | 0.000 | 0.926 (-0.129,1.981)  | 0.085 | 0.953 (-0.257,2.163)  | 0.123 | 0.354 (-0.777,1.485)  | 0.540 |
| Knee Prop Women            | 1.004 (0.998,1.011)   | 0.182 | 0.96 (0.84,1.097)      | 0.551 | 0.994 (0.986,1.003)   | 0.184 | 1.037 (0.939,1.146)   | 0.474 | 1.017 (0.908,1.138)   | 0.776 | 1.036 (0.928,1.157)   | 0.529 |
| Knee Prop 2+ Charlson      | 1.009 (0.988,1.031)   | 0.384 | 0.638 (0.392,1.037)    | 0.070 | 1.042 (1.008,1.077)   | 0.015 | 1.156 (0.891,1.501)   | 0.276 | 1.074 (0.829,1.393)   | 0.589 | 0.909 (0.636,1.299)   | 0.600 |
| Knee Prop High Deprivation | 1.005 (0.997,1.014)   | 0.237 | 0.968 (0.784,1.195)    | 0.761 | 0.986 (0.974,0.998)   | 0.023 | 1.224 (1.099,1.363)   | 0.000 | 1.075 (0.956,1.209)   | 0.225 | 1.031 (0.911,1.166)   | 0.631 |
| Knee LoS                   | -0.024 (-0.052,0.004) | 0.089 | 0.176 (-0.352,0.703)   | 0.515 | -0.008 (-0.041,0.025) | 0.625 | 0.422 (0.117,0.726)   | 0.007 | 0.15 (-0.174,0.475)   | 0.364 | 0.396 (0.027,0.765)   | 0.036 |

1  
2  
3  
4  
5  
6  
7  
8  
9  
10  
11  
12  
13  
14  
15  
16  
17  
18  
19  
20  
21  
22  
23  
24  
25  
26  
27  
28  
29  
30  
31  
32  
33  
34  
35  
36  
37  
38  
39  
40  
41  
42  
43  
44  
45  
46

|                      |                       |       |                        |       |                        |       |                       |       |                       |       |                        |       |
|----------------------|-----------------------|-------|------------------------|-------|------------------------|-------|-----------------------|-------|-----------------------|-------|------------------------|-------|
| Knee LoS Age 16-59   | -0.016 (-0.048,0.017) | 0.352 | 0.403 (-0.286,1.093)   | 0.252 | -0.028 (-0.074,0.019)  | 0.246 | 0.484 (0.111,0.857)   | 0.011 | 0.422 (-0.111,0.956)  | 0.121 | 0.475 (0.056,0.893)    | 0.026 |
| Knee LoS Age 16-59   | 0.007 (-0.026,0.041)  | 0.664 | -0.295 (-1.22,0.63)    | 0.532 | -0.026 (-0.085,0.033)  | 0.384 | 0.069 (-0.465,0.604)  | 0.799 | -0.194 (-0.754,0.366) | 0.497 | -0.096 (-0.673,0.48)   | 0.743 |
| Knee LoS Age 70-79   | -0.009 (-0.072,0.054) | 0.775 | 0.77 (-0.267,1.807)    | 0.145 | -0.054 (-0.128,0.02)   | 0.154 | -0.086 (-0.782,0.609) | 0.808 | -0.552 (-1.267,0.163) | 0.130 | 0.367 (-0.528,1.261)   | 0.421 |
| Knee LoS Age 80+     | -0.051 (-0.154,0.051) | 0.327 | -0.562 (-2.568,1.443)  | 0.583 | 0.028 (-0.105,0.161)   | 0.678 | 1.521 (-0.076,3.118)  | 0.062 | 1.37 (-0.178,2.918)   | 0.083 | 1.361 (-0.071,2.794)   | 0.063 |
| Knee LoS Men         | -0.007 (-0.037,0.023) | 0.656 | 0.096 (-0.512,0.704)   | 0.758 | -0.033 (-0.075,0.009)  | 0.121 | 0.082 (-0.382,0.547)  | 0.729 | 0.157 (-0.272,0.585)  | 0.474 | 0.205 (-0.265,0.675)   | 0.392 |
| Knee LoS Women       | -0.042 (-0.088,0.004) | 0.071 | 0.252 (-0.495,1)       | 0.508 | 0.017 (-0.036,0.07)    | 0.536 | 0.635 (0.107,1.164)   | 0.019 | 0.15 (-0.365,0.666)   | 0.567 | 0.49 (-0.022,1.003)    | 0.061 |
| Knee LoS Charlson 0  | -0.021 (-0.054,0.012) | 0.214 | 0.067 (-0.49,0.624)    | 0.814 | -0.011 (-0.056,0.034)  | 0.643 | 0.645 (0.278,1.013)   | 0.001 | 0.193 (-0.146,0.533)  | 0.265 | 0.415 (-0.078,0.907)   | 0.099 |
| Knee LoS Charlson 1  | -0.03 (-0.081,0.022)  | 0.260 | 0.47 (-0.741,1.681)    | 0.447 | -0.029 (-0.093,0.036)  | 0.384 | 0.455 (-0.111,1.021)  | 0.115 | 0.324 (-0.426,1.074)  | 0.398 | 1.058 (0.262,1.854)    | 0.009 |
| Knee LoS Charlson 2+ | -0.04 (-0.111,0.032)  | 0.276 | 0.407 (-2.137,2.951)   | 0.754 | -0.022 (-0.184,0.14)   | 0.788 | -0.627 (-1.883,0.628) | 0.327 | -0.949 (-2.145,0.247) | 0.120 | -1.433 (-2.278,-0.589) | 0.001 |
| Knee LoS Dep 1       | -0.009 (-0.064,0.045) | 0.733 | -0.035 (-0.918,0.847)  | 0.937 | -0.008 (-0.082,0.066)  | 0.826 | 0.257 (-0.443,0.958)  | 0.471 | 0.096 (-0.699,0.89)   | 0.813 | -0.127 (-0.786,0.532)  | 0.706 |
| Knee LoS Dep 2       | -0.019 (-0.065,0.026) | 0.413 | 0.199 (-1.031,1.429)   | 0.751 | -0.043 (-0.116,0.031)  | 0.253 | 0.018 (-0.822,0.858)  | 0.967 | -0.731 (-1.538,0.077) | 0.076 | 0.05 (-0.819,0.919)    | 0.910 |
| Knee LoS Dep 3       | 0.014 (-0.05,0.078)   | 0.670 | -0.426 (-1.892,1.04)   | 0.569 | -0.036 (-0.116,0.043)  | 0.369 | 0.976 (-0.09,2.043)   | 0.073 | 0.909 (-0.134,1.952)  | 0.088 | 0.547 (-0.408,1.503)   | 0.261 |
| Knee LoS Dep 4       | -0.064 (-0.143,0.015) | 0.113 | 0.634 (-0.591,1.858)   | 0.310 | 0.033 (-0.057,0.123)   | 0.474 | 0.669 (-0.193,1.531)  | 0.128 | 0.617 (-0.032,1.266)  | 0.063 | 0.852 (-0.138,1.842)   | 0.092 |
| Knee LoS Dep 5       | -0.035 (-0.116,0.047) | 0.405 | 0.709 (-0.701,2.119)   | 0.324 | 0.015 (-0.076,0.106)   | 0.745 | 0.123 (-0.882,1.128)  | 0.810 | -0.387 (-1.379,0.606) | 0.445 | 1.104 (-0.268,2.476)   | 0.115 |
| Knee Bed Occ         | 0.993 (0.984,1.001)   | 0.074 | 0.834 (0.711,0.979)    | 0.027 | 1 (0.989,1.011)        | 0.993 | 1.42 (1.269,1.59)     | 0.000 | 1.373 (1.217,1.548)   | 0.000 | 1.465 (1.287,1.667)    | 0.000 |
| Knee Public Private  | 0.006 (-0.02,0.031)   | 0.667 | -0.476 (-1.026,0.074)  | 0.090 | -0.015 (-0.04,0.009)   | 0.225 | 0.113 (-0.089,0.314)  | 0.274 | 0.276 (0.035,0.517)   | 0.025 | 0.131 (-0.071,0.332)   | 0.205 |
| Elec Emerg Ratio     | -0.005 (-0.013,0.002) | 0.167 | -0.322 (-0.451,-0.192) | 0.000 | -0.016 (-0.025,-0.006) | 0.001 | -0.008 (-0.117,0.101) | 0.884 | -0.053 (-0.174,0.068) | 0.392 | -0.028 (-0.128,0.073)  | 0.591 |

**Supplementary Table T4. Interrupted time series model results with maximum auto-correlation lag 5**

|                            | pre-trend              |       | level change           |       | trend change           |       | spring                |       | summer                 |       | autumn                |       |
|----------------------------|------------------------|-------|------------------------|-------|------------------------|-------|-----------------------|-------|------------------------|-------|-----------------------|-------|
|                            | estimate (95% CI)      | p     | estimate (95% CI)      | p     | estimate (95% CI)      | p     | estimate (95% CI)     | p     | estimate (95% CI)      | p     | estimate (95% CI)     | p     |
| Hip Admissions             | 0.995 (0.987,1.003)    | 0.249 | 1.055 (0.917,1.215)    | 0.454 | 0.991 (0.978,1.005)    | 0.217 | 1.19 (1.04,1.362)     | 0.012 | 1.207 (1.104,1.32)     | 0.000 | 1.101 (0.993,1.221)   | 0.069 |
| Hip Average Age            | -0.015 (-0.094,0.065)  | 0.714 | 1.571 (0.241,2.901)    | 0.021 | -0.06 (-0.168,0.048)   | 0.277 | 1.52 (-0.178,3.218)   | 0.079 | 2.09 (0.818,3.361)     | 0.001 | 1.031 (-0.639,2.701)  | 0.226 |
| Hip Prop Women             | 0.999 (0.995,1.002)    | 0.503 | 0.966 (0.895,1.042)    | 0.367 | 1.007 (1.001,1.014)    | 0.027 | 1.023 (0.932,1.122)   | 0.636 | 1.088 (1,1.184)        | 0.051 | 0.981 (0.879,1.094)   | 0.727 |
| Hip Prop 2+ Charlson       | 0.994 (0.985,1.004)    | 0.261 | 1.411 (1.116,1.785)    | 0.004 | 1.01 (1,1.02)          | 0.042 | 1.195 (0.979,1.459)   | 0.079 | 1.306 (1.111,1.535)    | 0.001 | 1.003 (0.792,1.27)    | 0.981 |
| Hip Prop High Deprivation  | 1.003 (0.994,1.012)    | 0.551 | 1.027 (0.883,1.195)    | 0.729 | 1.004 (0.99,1.018)     | 0.577 | 0.937 (0.805,1.091)   | 0.400 | 0.877 (0.752,1.022)    | 0.092 | 0.996 (0.847,1.171)   | 0.961 |
| Hip LoS                    | -0.006 (-0.029,0.017)  | 0.605 | 0.312 (-0.12,0.745)    | 0.157 | -0.014 (-0.042,0.015)  | 0.346 | 0.502 (0.286,0.718)   | 0.000 | 0.135 (-0.191,0.461)   | 0.418 | 0.1 (-0.332,0.532)    | 0.650 |
| Hip LoS Age 16-59          | -0.003 (-0.026,0.02)   | 0.773 | 0.379 (-0.046,0.803)   | 0.080 | -0.026 (-0.062,0.01)   | 0.152 | 0.223 (-0.113,0.559)  | 0.193 | 0.384 (0.09,0.679)     | 0.011 | 0.219 (-0.191,0.63)   | 0.295 |
| Hip LoS Age 60-69          | -0.004 (-0.031,0.024)  | 0.799 | 0.013 (-0.766,0.791)   | 0.975 | 0 (-0.051,0.05)        | 0.987 | 0.107 (-0.33,0.543)   | 0.632 | 0.158 (-0.451,0.766)   | 0.611 | 0.162 (-0.352,0.676)  | 0.537 |
| Hip LoS Age 70-79          | 0.006 (-0.054,0.065)   | 0.853 | -0.753 (-1.944,0.438)  | 0.215 | 0.007 (-0.056,0.069)   | 0.836 | -0.433 (-1.343,0.476) | 0.350 | -0.842 (-1.91,0.226)   | 0.122 | -0.865 (-2.063,0.334) | 0.157 |
| Hip LoS Age 80+            | -0.068 (-0.147,0.012)  | 0.097 | 2.109 (0.803,3.414)    | 0.002 | -0.002 (-0.111,0.107)  | 0.967 | 1.506 (0.499,2.513)   | 0.003 | 0.222 (-0.799,1.243)   | 0.670 | 1.003 (-0.111,2.116)  | 0.078 |
| Hip LoS Men                | -0.007 (-0.047,0.033)  | 0.732 | 0.347 (-0.44,1.135)    | 0.387 | -0.02 (-0.073,0.033)   | 0.458 | 0.293 (-0.117,0.704)  | 0.161 | 0.289 (-0.193,0.771)   | 0.239 | 0.458 (-0.163,1.079)  | 0.149 |
| Hip LoS Women              | -0.004 (-0.035,0.028)  | 0.816 | 0.235 (-0.271,0.741)   | 0.362 | -0.014 (-0.046,0.018)  | 0.391 | 0.693 (0.395,0.991)   | 0.000 | 0.009 (-0.421,0.439)   | 0.966 | -0.203 (-0.762,0.357) | 0.477 |
| Hip LoS Charlson 0         | -0.011 (-0.039,0.016)  | 0.418 | 0.297 (-0.242,0.837)   | 0.280 | -0.005 (-0.035,0.025)  | 0.738 | 0.912 (0.617,1.208)   | 0.000 | 0.178 (-0.123,0.478)   | 0.247 | 0.222 (-0.066,0.51)   | 0.131 |
| Hip LoS Charlson 1         | 0.034 (0.003,0.065)    | 0.030 | 0.238 (-0.604,1.08)    | 0.580 | -0.077 (-0.137,-0.018) | 0.011 | 0.191 (-0.385,0.767)  | 0.515 | 0.312 (-0.431,1.056)   | 0.410 | 0.014 (-0.563,0.591)  | 0.962 |
| Hip LoS Charlson 2+        | -0.123 (-0.239,-0.007) | 0.038 | 0.172 (-1.97,2.314)    | 0.875 | 0.116 (0.005,0.228)    | 0.040 | -0.789 (-2.189,0.611) | 0.269 | -0.783 (-2.119,0.553)  | 0.250 | 0.188 (-2.176,2.552)  | 0.876 |
| Hip LoS Dep 1              | 0.004 (-0.029,0.037)   | 0.814 | 0.553 (-0.303,1.408)   | 0.206 | -0.017 (-0.065,0.032)  | 0.501 | 0.784 (0.131,1.437)   | 0.019 | 0.42 (-0.034,0.874)    | 0.070 | 0.299 (-0.401,0.999)  | 0.402 |
| Hip LoS Dep 2              | -0.038 (-0.083,0.006)  | 0.092 | 0.822 (-0.167,1.81)    | 0.103 | -0.015 (-0.078,0.047)  | 0.630 | 1.509 (0.737,2.28)    | 0.000 | 0.66 (-0.202,1.522)    | 0.133 | 0.589 (-0.461,1.638)  | 0.272 |
| Hip LoS Dep 3              | -0.034 (-0.102,0.033)  | 0.319 | 0.617 (-0.789,2.023)   | 0.390 | 0.01 (-0.072,0.091)    | 0.819 | -0.216 (-1.011,0.579) | 0.595 | -0.424 (-1.293,0.445)  | 0.339 | -0.701 (-1.351,-0.05) | 0.035 |
| Hip LoS Dep 4              | 0.081 (0.017,0.144)    | 0.013 | -0.473 (-1.858,0.913)  | 0.504 | -0.112 (-0.189,-0.035) | 0.004 | -0.374 (-1.59,0.842)  | 0.547 | -1.204 (-2.355,-0.053) | 0.040 | -0.491 (-1.989,1.007) | 0.520 |
| Hip LoS Dep 5              | 0.015 (-0.056,0.085)   | 0.682 | -0.72 (-1.647,0.208)   | 0.128 | 0 (-0.07,0.07)         | 0.998 | 0.621 (-0.104,1.347)  | 0.093 | 0.689 (-0.25,1.629)    | 0.150 | 0.816 (-0.696,2.329)  | 0.290 |
| Hip Bed Occ                | 0.997 (0.987,1.008)    | 0.627 | 1 (0.862,1.161)        | 0.996 | 0.987 (0.97,1.004)     | 0.128 | 1.291 (1.116,1.492)   | 0.001 | 1.283 (1.14,1.444)     | 0.000 | 1.146 (0.99,1.326)    | 0.068 |
| Hip Public Private         | 0.013 (-0.015,0.041)   | 0.377 | -0.741 (-1.237,-0.245) | 0.003 | -0.019 (-0.05,0.011)   | 0.218 | -0.008 (-0.212,0.196) | 0.939 | 0.308 (0.154,0.463)    | 0.000 | 0.038 (-0.166,0.241)  | 0.718 |
| Knee Admissions            | 0.995 (0.992,0.999)    | 0.016 | 0.843 (0.761,0.934)    | 0.001 | 1.005 (0.998,1.012)    | 0.170 | 1.308 (1.154,1.482)   | 0.000 | 1.26 (1.16,1.369)      | 0.000 | 1.286 (1.178,1.403)   | 0.000 |
| Knee Average Age           | -0.078 (-0.152,-0.005) | 0.037 | -1.632 (-2.825,-0.439) | 0.007 | 0.211 (0.128,0.293)    | 0.000 | 0.926 (-0.072,1.924)  | 0.069 | 0.953 (0.077,1.829)    | 0.033 | 0.354 (-0.422,1.13)   | 0.371 |
| Knee Prop Women            | 1.004 (0.999,1.009)    | 0.086 | 0.96 (0.861,1.071)     | 0.465 | 0.994 (0.987,1.001)    | 0.097 | 1.037 (0.973,1.105)   | 0.260 | 1.017 (0.922,1.121)    | 0.743 | 1.036 (0.966,1.111)   | 0.319 |
| Knee Prop 2+ Charlson      | 1.009 (0.993,1.026)    | 0.250 | 0.638 (0.468,0.869)    | 0.004 | 1.042 (1.021,1.064)    | 0.000 | 1.156 (0.931,1.436)   | 0.190 | 1.074 (0.841,1.372)    | 0.567 | 0.909 (0.626,1.321)   | 0.617 |
| Knee Prop High Deprivation | 1.005 (0.999,1.011)    | 0.107 | 0.968 (0.835,1.122)    | 0.664 | 0.986 (0.977,0.995)    | 0.003 | 1.224 (1.082,1.384)   | 0.001 | 1.075 (0.95,1.217)     | 0.251 | 1.031 (0.924,1.149)   | 0.586 |
| Knee LoS                   | -0.024 (-0.047,-0.001) | 0.042 | 0.176 (-0.2,0.551)     | 0.360 | -0.008 (-0.031,0.015)  | 0.490 | 0.422 (0.033,0.81)    | 0.033 | 0.15 (-0.199,0.499)    | 0.398 | 0.396 (-0.011,0.803)  | 0.057 |

1  
2  
3  
4  
5  
6  
7  
8  
9  
10  
11  
12  
13  
14  
15  
16  
17  
18  
19  
20  
21  
22  
23  
24  
25  
26  
27  
28  
29  
30  
31  
32  
33  
34  
35  
36  
37  
38  
39  
40  
41  
42  
43  
44  
45  
46

|                      |                        |       |                        |       |                        |       |                       |       |                       |       |                        |       |
|----------------------|------------------------|-------|------------------------|-------|------------------------|-------|-----------------------|-------|-----------------------|-------|------------------------|-------|
| Knee LoS Age 16-59   | -0.016 (-0.032,0.001)  | 0.068 | 0.403 (0.008,0.799)    | 0.046 | -0.028 (-0.059,0.003)  | 0.081 | 0.484 (0.198,0.77)    | 0.001 | 0.422 (-0.01,0.855)   | 0.056 | 0.475 (0.216,0.734)    | 0.000 |
| Knee LoS Age 16-59   | 0.007 (-0.018,0.033)   | 0.571 | -0.295 (-0.854,0.265)  | 0.302 | -0.026 (-0.062,0.009)  | 0.147 | 0.069 (-0.455,0.593)  | 0.795 | -0.194 (-0.652,0.265) | 0.407 | -0.096 (-0.713,0.52)   | 0.759 |
| Knee LoS Age 70-79   | -0.009 (-0.045,0.027)  | 0.616 | 0.77 (0.101,1.439)     | 0.024 | -0.054 (-0.096,-0.012) | 0.012 | -0.086 (-0.736,0.563) | 0.794 | -0.552 (-1.116,0.012) | 0.055 | 0.367 (-0.3,1.034)     | 0.281 |
| Knee LoS Age 80+     | -0.051 (-0.097,-0.006) | 0.026 | -0.562 (-1.849,0.724)  | 0.391 | 0.028 (-0.062,0.119)   | 0.541 | 1.521 (0.119,2.923)   | 0.034 | 1.37 (0.391,2.349)    | 0.006 | 1.361 (0.617,2.106)    | 0.000 |
| Knee LoS Men         | -0.007 (-0.028,0.014)  | 0.514 | 0.096 (-0.297,0.488)   | 0.633 | -0.033 (-0.062,-0.004) | 0.024 | 0.082 (-0.416,0.58)   | 0.746 | 0.157 (-0.244,0.558)  | 0.444 | 0.205 (-0.149,0.559)   | 0.256 |
| Knee LoS Women       | -0.042 (-0.079,-0.005) | 0.027 | 0.252 (-0.356,0.861)   | 0.416 | 0.017 (-0.018,0.052)   | 0.350 | 0.635 (-0.036,1.307)  | 0.064 | 0.15 (-0.454,0.754)   | 0.625 | 0.49 (-0.258,1.239)    | 0.199 |
| Knee LoS Charlson 0  | -0.021 (-0.044,0.002)  | 0.077 | 0.067 (-0.312,0.446)   | 0.730 | -0.011 (-0.036,0.015)  | 0.419 | 0.645 (0.331,0.959)   | 0.000 | 0.193 (-0.129,0.516)  | 0.240 | 0.415 (0.075,0.754)    | 0.017 |
| Knee LoS Charlson 1  | -0.03 (-0.064,0.005)   | 0.092 | 0.47 (-0.199,1.139)    | 0.169 | -0.029 (-0.067,0.01)   | 0.145 | 0.455 (-0.097,1.007)  | 0.106 | 0.324 (-0.341,0.988)  | 0.340 | 1.058 (0.384,1.731)    | 0.002 |
| Knee LoS Charlson 2+ | -0.04 (-0.092,0.012)   | 0.134 | 0.407 (-1.956,2.771)   | 0.736 | -0.022 (-0.184,0.14)   | 0.789 | -0.627 (-1.625,0.37)  | 0.218 | -0.949 (-2.374,0.476) | 0.192 | -1.433 (-2.175,-0.691) | 0.000 |
| Knee LoS Dep 1       | -0.009 (-0.05,0.031)   | 0.644 | -0.035 (-0.656,0.586)  | 0.911 | -0.008 (-0.059,0.043)  | 0.750 | 0.257 (-0.541,1.056)  | 0.527 | 0.096 (-0.581,0.772)  | 0.782 | -0.127 (-0.724,0.47)   | 0.677 |
| Knee LoS Dep 2       | -0.019 (-0.055,0.017)  | 0.300 | 0.199 (-0.57,0.968)    | 0.612 | -0.043 (-0.086,0)      | 0.049 | 0.018 (-0.731,0.767)  | 0.962 | -0.731 (-1.507,0.046) | 0.065 | 0.05 (-0.887,0.987)    | 0.917 |
| Knee LoS Dep 3       | 0.014 (-0.031,0.059)   | 0.544 | -0.426 (-1.102,0.25)   | 0.217 | -0.036 (-0.095,0.022)  | 0.220 | 0.976 (0.281,1.672)   | 0.006 | 0.909 (-0.067,1.886)  | 0.068 | 0.547 (-0.12,1.215)    | 0.108 |
| Knee LoS Dep 4       | -0.064 (-0.127,-0.001) | 0.047 | 0.634 (-0.165,1.432)   | 0.120 | 0.033 (-0.04,0.106)    | 0.380 | 0.669 (-0.076,1.414)  | 0.079 | 0.617 (0.007,1.227)   | 0.047 | 0.852 (-0.274,1.978)   | 0.138 |
| Knee LoS Dep 5       | -0.035 (-0.087,0.018)  | 0.194 | 0.709 (-0.225,1.643)   | 0.137 | 0.015 (-0.042,0.072)   | 0.606 | 0.123 (-0.701,0.947)  | 0.770 | -0.387 (-1.304,0.531) | 0.409 | 1.104 (0.188,2.02)     | 0.018 |
| Knee Bed Occ         | 0.993 (0.986,0.999)    | 0.032 | 0.834 (0.728,0.956)    | 0.009 | 1 (0.991,1.009)        | 0.991 | 1.42 (1.308,1.542)    | 0.000 | 1.373 (1.213,1.553)   | 0.000 | 1.465 (1.318,1.627)    | 0.000 |
| Knee Public Private  | 0.006 (-0.02,0.031)    | 0.667 | -0.476 (-1.026,0.074)  | 0.090 | -0.015 (-0.04,0.009)   | 0.225 | 0.113 (-0.089,0.314)  | 0.274 | 0.276 (0.035,0.517)   | 0.025 | 0.131 (-0.071,0.332)   | 0.205 |
| Elec Emerg Ratio     | -0.005 (-0.013,0.003)  | 0.198 | -0.322 (-0.455,-0.189) | 0.000 | -0.016 (-0.026,-0.005) | 0.004 | -0.008 (-0.107,0.091) | 0.872 | -0.053 (-0.18,0.074)  | 0.414 | -0.028 (-0.163,0.108)  | 0.690 |

**The RECORD statement – checklist of items, extended from the STROBE statement, that should be reported in observational studies using routinely collected health data.**

|                           | Item No. | STROBE items                                                                                                                                                                               | Location in manuscript where items are reported | RECORD items                                                                                                                                                                                                                                                                                                                                                                                                                                | Location in manuscript where items are reported |
|---------------------------|----------|--------------------------------------------------------------------------------------------------------------------------------------------------------------------------------------------|-------------------------------------------------|---------------------------------------------------------------------------------------------------------------------------------------------------------------------------------------------------------------------------------------------------------------------------------------------------------------------------------------------------------------------------------------------------------------------------------------------|-------------------------------------------------|
| <b>Title and abstract</b> |          |                                                                                                                                                                                            |                                                 |                                                                                                                                                                                                                                                                                                                                                                                                                                             |                                                 |
|                           | 1        | (a) Indicate the study's design with a commonly used term in the title or the abstract (b) Provide in the abstract an informative and balanced summary of what was done and what was found |                                                 | RECORD 1.1: The type of data used should be specified in the title or abstract. When possible, the name of the databases used should be included.<br><br>RECORD 1.2: If applicable, the geographic region and timeframe within which the study took place should be reported in the title or abstract.<br><br>RECORD 1.3: If linkage between databases was conducted for the study, this should be clearly stated in the title or abstract. | Abstract P2 L35-37<br><br>Abstract P2 L35-38    |
| <b>Introduction</b>       |          |                                                                                                                                                                                            |                                                 |                                                                                                                                                                                                                                                                                                                                                                                                                                             |                                                 |
| Background rationale      | 2        | Explain the scientific background and rationale for the investigation being reported                                                                                                       |                                                 |                                                                                                                                                                                                                                                                                                                                                                                                                                             | Introduction P4-5 L76-113                       |
| Objectives                | 3        | State specific objectives, including any prespecified hypotheses                                                                                                                           |                                                 |                                                                                                                                                                                                                                                                                                                                                                                                                                             | Introduction P5 L107-113                        |
| <b>Methods</b>            |          |                                                                                                                                                                                            |                                                 |                                                                                                                                                                                                                                                                                                                                                                                                                                             |                                                 |
| Study Design              | 4        | Present key elements of study design early in the paper                                                                                                                                    |                                                 |                                                                                                                                                                                                                                                                                                                                                                                                                                             | Methods P5 L116-119                             |
| Setting                   | 5        | Describe the setting, locations, and relevant dates, including periods of recruitment, exposure, follow-up, and data collection                                                            |                                                 |                                                                                                                                                                                                                                                                                                                                                                                                                                             | Methods P5 L116-119<br>Methods P7-8 L70-176     |

|                                                                                                                                                                                                            |          |                                                                                                                                                                                                                                                                                                                                                                                                                                                                                                                                                                                                                                                                                                                        |  |                                                                                                                                                                                                                                                                                                                                                                                                                                                                                                                                                                                                                                                                                                      |                                                               |
|------------------------------------------------------------------------------------------------------------------------------------------------------------------------------------------------------------|----------|------------------------------------------------------------------------------------------------------------------------------------------------------------------------------------------------------------------------------------------------------------------------------------------------------------------------------------------------------------------------------------------------------------------------------------------------------------------------------------------------------------------------------------------------------------------------------------------------------------------------------------------------------------------------------------------------------------------------|--|------------------------------------------------------------------------------------------------------------------------------------------------------------------------------------------------------------------------------------------------------------------------------------------------------------------------------------------------------------------------------------------------------------------------------------------------------------------------------------------------------------------------------------------------------------------------------------------------------------------------------------------------------------------------------------------------------|---------------------------------------------------------------|
| <p>1<br/>2<br/>3<br/>4<br/>5<br/>6<br/>7<br/>8<br/>9<br/>10<br/>11<br/>12<br/>13<br/>14<br/>15<br/>16<br/>17<br/>18<br/>19<br/>20<br/>21<br/>22<br/>23<br/>24<br/>25<br/>26<br/>27</p> <p>Participants</p> | <p>6</p> | <p>(a) <i>Cohort study</i> - Give the eligibility criteria, and the sources and methods of selection of participants. Describe methods of follow-up<br/> <i>Case-control study</i> - Give the eligibility criteria, and the sources and methods of case ascertainment and control selection. Give the rationale for the choice of cases and controls<br/> <i>Cross-sectional study</i> - Give the eligibility criteria, and the sources and methods of selection of participants</p> <p>(b) <i>Cohort study</i> - For matched studies, give matching criteria and number of exposed and unexposed<br/> <i>Case-control study</i> - For matched studies, give matching criteria and the number of controls per case</p> |  | <p>RECORD 6.1: The methods of study population selection (such as codes or algorithms used to identify subjects) should be listed in detail. If this is not possible, an explanation should be provided.</p> <p>RECORD 6.2: Any validation studies of the codes or algorithms used to select the population should be referenced. If validation was conducted for this study and not published elsewhere, detailed methods and results should be provided.</p> <p>RECORD 6.3: If the study involved linkage of databases, consider use of a flow diagram or other graphical display to demonstrate the data linkage process, including the number of individuals with linked data at each stage.</p> | <p>Methods P6<br/>L141-147<br/>Supplementary<br/>Table T1</p> |
| <p>28<br/>29<br/>30<br/>31<br/>32<br/>33<br/>34</p> <p>Variables</p>                                                                                                                                       | <p>7</p> | <p>Clearly define all outcomes, exposures, predictors, potential confounders, and effect modifiers. Give diagnostic criteria, if applicable.</p>                                                                                                                                                                                                                                                                                                                                                                                                                                                                                                                                                                       |  | <p>RECORD 7.1: A complete list of codes and algorithms used to classify exposures, outcomes, confounders, and effect modifiers should be provided. If these cannot be reported, an explanation should be provided.</p>                                                                                                                                                                                                                                                                                                                                                                                                                                                                               | <p>Methods P6-7<br/>L141-169</p>                              |
| <p>35<br/>36<br/>37<br/>38<br/>39<br/>40<br/>41<br/>42</p> <p>Data sources/<br/>measurement</p>                                                                                                            | <p>8</p> | <p>For each variable of interest, give sources of data and details of methods of assessment (measurement). Describe comparability of assessment methods if there is more than one group</p>                                                                                                                                                                                                                                                                                                                                                                                                                                                                                                                            |  |                                                                                                                                                                                                                                                                                                                                                                                                                                                                                                                                                                                                                                                                                                      | <p>Methods P5-6<br/>L120-140</p>                              |



|                                                                                                                                                    |                                  |    |                                                                                                                                                                                                                                                                                                                                                                                                                                                                                                                                                                      |                                                                                                                                                       |                              |
|----------------------------------------------------------------------------------------------------------------------------------------------------|----------------------------------|----|----------------------------------------------------------------------------------------------------------------------------------------------------------------------------------------------------------------------------------------------------------------------------------------------------------------------------------------------------------------------------------------------------------------------------------------------------------------------------------------------------------------------------------------------------------------------|-------------------------------------------------------------------------------------------------------------------------------------------------------|------------------------------|
| 1<br>2<br>3<br>4                                                                                                                                   | Bias                             | 9  | Describe any efforts to address potential sources of bias                                                                                                                                                                                                                                                                                                                                                                                                                                                                                                            |                                                                                                                                                       | Methods P7-8<br>L170-185,    |
| 5<br>6<br>7<br>8<br>9                                                                                                                              | Study size                       | 10 | Explain how the study size was arrived at                                                                                                                                                                                                                                                                                                                                                                                                                                                                                                                            |                                                                                                                                                       | Methods P6<br>L141-147       |
| 10<br>11<br>12<br>13<br>14<br>15<br>16<br>17<br>18<br>19<br>20<br>21<br>22<br>23<br>24<br>25<br>26<br>27<br>28<br>29<br>30<br>31<br>32<br>33<br>34 | Quantitative variables           | 11 | Explain how quantitative variables were handled in the analyses. If applicable, describe which groupings were chosen, and why                                                                                                                                                                                                                                                                                                                                                                                                                                        |                                                                                                                                                       | Methods P6-7<br>L141-169     |
| 35<br>36<br>37<br>38<br>39<br>40<br>41<br>42<br>43<br>44<br>45<br>46<br>47                                                                         | Statistical methods              | 12 | (a) Describe all statistical methods, including those used to control for confounding<br>(b) Describe any methods used to examine subgroups and interactions<br>(c) Explain how missing data were addressed<br>(d) <i>Cohort study</i> - If applicable, explain how loss to follow-up was addressed<br><i>Case-control study</i> - If applicable, explain how matching of cases and controls was addressed<br><i>Cross-sectional study</i> - If applicable, describe analytical methods taking account of sampling strategy<br>(e) Describe any sensitivity analyses |                                                                                                                                                       | Methods P7-8<br>L170-185     |
|                                                                                                                                                    | Data access and cleaning methods |    | ..                                                                                                                                                                                                                                                                                                                                                                                                                                                                                                                                                                   | RECORD 12.1: Authors should describe the extent to which the investigators had access to the database population used to create the study population. | Data Sharing P17<br>L392-400 |

|                  |    |                                                                                                                                                                                                                                                                                                                                                 |  |                                                                                                                                                                                                                                                                                                                    |                                                   |
|------------------|----|-------------------------------------------------------------------------------------------------------------------------------------------------------------------------------------------------------------------------------------------------------------------------------------------------------------------------------------------------|--|--------------------------------------------------------------------------------------------------------------------------------------------------------------------------------------------------------------------------------------------------------------------------------------------------------------------|---------------------------------------------------|
|                  |    |                                                                                                                                                                                                                                                                                                                                                 |  | RECORD 12.2: Authors should provide information on the data cleaning methods used in the study.                                                                                                                                                                                                                    | Methods P6-7<br>L141-169                          |
| Linkage          |    | ..                                                                                                                                                                                                                                                                                                                                              |  | RECORD 12.3: State whether the study included person-level, institutional-level, or other data linkage across two or more databases. The methods of linkage and methods of linkage quality evaluation should be provided.                                                                                          | N/A                                               |
| <b>Results</b>   |    |                                                                                                                                                                                                                                                                                                                                                 |  |                                                                                                                                                                                                                                                                                                                    |                                                   |
| Participants     | 13 | (a) Report the numbers of individuals at each stage of the study ( <i>e.g.</i> , numbers potentially eligible, examined for eligibility, confirmed eligible, included in the study, completing follow-up, and analysed)<br>(b) Give reasons for non-participation at each stage.<br>(c) Consider use of a flow diagram                          |  | RECORD 13.1: Describe in detail the selection of the persons included in the study ( <i>i.e.</i> , study population selection) including filtering based on data quality, data availability and linkage. The selection of included persons can be described in the text and/or by means of the study flow diagram. | Methods P6<br>L141-147<br><br>Results P8 L191-194 |
| Descriptive data | 14 | (a) Give characteristics of study participants ( <i>e.g.</i> , demographic, clinical, social) and information on exposures and potential confounders<br>(b) Indicate the number of participants with missing data for each variable of interest<br>(c) <i>Cohort study</i> - summarise follow-up time ( <i>e.g.</i> , average and total amount) |  |                                                                                                                                                                                                                                                                                                                    | Results P8 L191-194                               |
| Outcome data     | 15 | <i>Cohort study</i> - Report numbers of outcome events or summary measures over time<br><i>Case-control study</i> - Report numbers in each exposure                                                                                                                                                                                             |  |                                                                                                                                                                                                                                                                                                                    | Results P8-9<br>L195-206                          |

|                   |    |                                                                                                                                                                                                                                                                                                                                                                                                                 |  |                                                                                                                                                                                                                                                                                                          |                             |
|-------------------|----|-----------------------------------------------------------------------------------------------------------------------------------------------------------------------------------------------------------------------------------------------------------------------------------------------------------------------------------------------------------------------------------------------------------------|--|----------------------------------------------------------------------------------------------------------------------------------------------------------------------------------------------------------------------------------------------------------------------------------------------------------|-----------------------------|
|                   |    | category, or summary measures of exposure<br><i>Cross-sectional study</i> - Report numbers of outcome events or summary measures                                                                                                                                                                                                                                                                                |  |                                                                                                                                                                                                                                                                                                          |                             |
| Main results      | 16 | (a) Give unadjusted estimates and, if applicable, confounder-adjusted estimates and their precision (e.g., 95% confidence interval). Make clear which confounders were adjusted for and why they were included<br>(b) Report category boundaries when continuous variables were categorized<br>(c) If relevant, consider translating estimates of relative risk into absolute risk for a meaningful time period |  |                                                                                                                                                                                                                                                                                                          | Results P9-11<br>L196-267   |
| Other analyses    | 17 | Report other analyses done— e.g., analyses of subgroups and interactions, and sensitivity analyses                                                                                                                                                                                                                                                                                                              |  |                                                                                                                                                                                                                                                                                                          | Results P9-11<br>L196-267   |
| <b>Discussion</b> |    |                                                                                                                                                                                                                                                                                                                                                                                                                 |  |                                                                                                                                                                                                                                                                                                          |                             |
| Key results       | 18 | Summarise key results with reference to study objectives                                                                                                                                                                                                                                                                                                                                                        |  |                                                                                                                                                                                                                                                                                                          | Discussion P11-12, L268-288 |
| Limitations       | 19 | Discuss limitations of the study, taking into account sources of potential bias or imprecision. Discuss both direction and magnitude of any potential bias                                                                                                                                                                                                                                                      |  | RECORD 19.1: Discuss the implications of using data that were not created or collected to answer the specific research question(s). Include discussion of misclassification bias, unmeasured confounding, missing data, and changing eligibility over time, as they pertain to the study being reported. | Discussion P12-13 L289-303  |
| Interpretation    | 20 | Give a cautious overall interpretation of results considering objectives,                                                                                                                                                                                                                                                                                                                                       |  |                                                                                                                                                                                                                                                                                                          | Discussion P13-14 L317-340  |

|                                                           |    |                                                                                                                                                               |  |                                                                                                                                                          |                                                        |
|-----------------------------------------------------------|----|---------------------------------------------------------------------------------------------------------------------------------------------------------------|--|----------------------------------------------------------------------------------------------------------------------------------------------------------|--------------------------------------------------------|
|                                                           |    | limitations, multiplicity of analyses, results from similar studies, and other relevant evidence                                                              |  |                                                                                                                                                          |                                                        |
| Generalisability                                          | 21 | Discuss the generalisability (external validity) of the study results                                                                                         |  |                                                                                                                                                          | Discussion P13<br>L294-303                             |
| <b>Other Information</b>                                  |    |                                                                                                                                                               |  |                                                                                                                                                          |                                                        |
| Funding                                                   | 22 | Give the source of funding and the role of the funders for the present study and, if applicable, for the original study on which the present article is based |  |                                                                                                                                                          | Funding Statement P16<br>L375-380                      |
| Accessibility of protocol, raw data, and programming code |    | ..                                                                                                                                                            |  | RECORD 22.1: Authors should provide information on how to access any supplemental information such as the study protocol, raw data, or programming code. | Methods P8<br>L186-188<br>Data Sharing P17<br>L392-400 |

\*Reference: Benchimol EI, Smeeth L, Guttman A, Harron K, Moher D, Petersen I, Sørensen HT, von Elm E, Langan SM, the RECORD Working Committee. The REporting of studies Conducted using Observational Routinely-collected health Data (RECORD) Statement. *PLoS Medicine* 2015; in press.

\*Checklist is protected under Creative Commons Attribution ([CC BY](https://creativecommons.org/licenses/by/4.0/)) license.
