# Supplementary material for: Impact of pausing elective hip and knee replacement surgery during winter 2017 on subsequent service provision at a major NHS Trust: a descriptive observational study using interrupted time series
Source: PubMed Central journal article supplement (PMC10193088; doi:10.1136/bmjopen-2022-066398), 2023-05-16
Supplement: bmjopen-2022-066398supp002.pdf [file bmjopen-2022-066398supp002.pdf]

Supplementary Figure F2. Average length of stay for primary hip (left) and knee (right) replacement operations at NBT

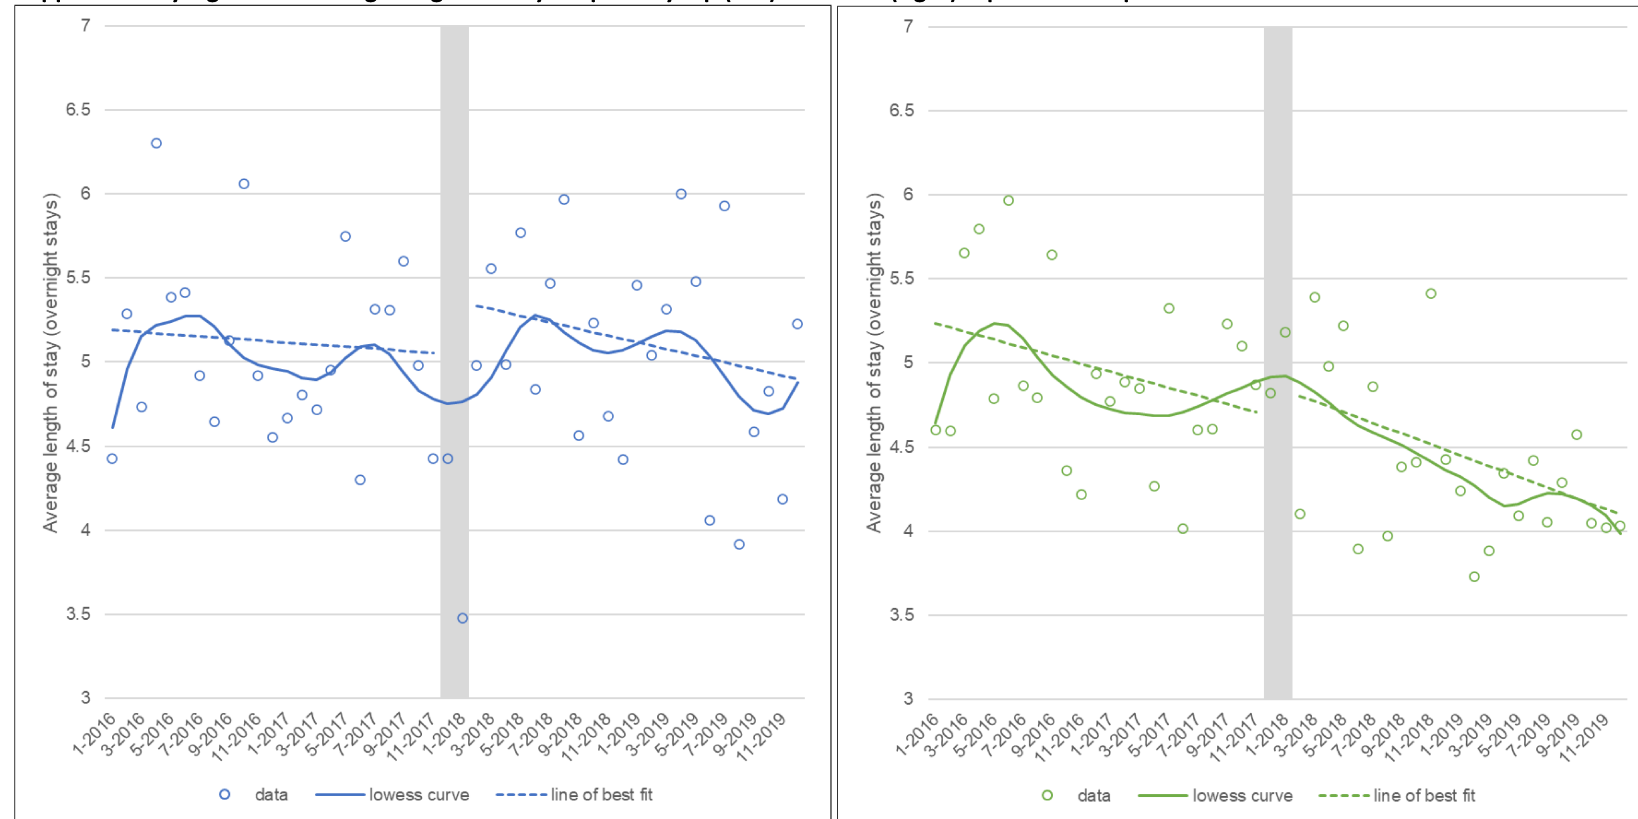

Note: grey area shows the winter 2017 cancellations and is excluded from the analysis
