# Supplementary material for: Impact of pausing elective hip and knee replacement surgery during winter 2017 on subsequent service provision at a major NHS Trust: a descriptive observational study using interrupted time series
Source: PubMed Central journal article supplement (PMC10193088; doi:10.1136/bmjopen-2022-066398), 2023-05-16
Supplement: bmjopen-2022-066398supp003.pdf [file bmjopen-2022-066398supp003.pdf]

**Supplementary Table T1. OPCS-4 codes used to identify primary hip and knee replacement operations**

| <b>Category</b>                      | <b>Code</b> | <b>Description</b>                                                               | <b>Notes</b> |
|--------------------------------------|-------------|----------------------------------------------------------------------------------|--------------|
| <i>Primary Total Hip Replacement</i> | W37.1       | Primary total prosthetic replacement of hip joint using cement                   |              |
|                                      | W37.8       | Other specified total prosthetic replacement of hip joint using cement           |              |
|                                      | W37.9       | Unspecified total prosthetic replacement of hip joint using cement               |              |
|                                      | W38.1       | Primary total prosthetic replacement of hip joint not using cement               |              |
|                                      | W38.8       | Other specified total prosthetic replacement of hip joint not using cement       |              |
|                                      | W38.9       | Unspecified total prosthetic replacement of hip joint not using cement           |              |
|                                      | W39.1       | Primary total prosthetic replacement of hip joint NEC                            |              |
|                                      | W39.8       | Other specified other total prosthetic replacement of hip joint                  |              |
|                                      | W39.9       | Unspecified other total prosthetic replacement of hip joint                      |              |
|                                      | W43.1       | Primary total prosthetic replacement of other joint using cement NEC             |              |
|                                      | W43.8       | Other specified total prosthetic replacement of other joint using cement NEC     |              |
|                                      | W43.9       | Unspecified total prosthetic replacement of other joint using cement NEC         |              |
|                                      | W44.1       | Primary total prosthetic replacement of other joint not using cement NEC         |              |
|                                      | W44.8       | Other specified total prosthetic replacement of other joint not using cement NEC |              |
|                                      | W44.9       | Unspecified total prosthetic replacement of other joint not using cement NEC     |              |
|                                      | W45.1       | Other primary total prosthetic replacement of other joint NEC                    |              |
|                                      | W45.8       | Other specified total prosthetic replacement of other joint NEC                  |              |
|                                      | W45.9       | Unspecified total prosthetic replacement of other joint NEC                      |              |
|                                      | W52.1       | Primary prosthetic replacement of articulation of bone using cement NEC          |              |

- W52.8 Other specified prosthetic replacement of articulation of bone using cement NEC
  - W52.9 Unspecified prosthetic replacement of articulation of bone using cement NEC
  - W53.1 Primary prosthetic replacement of articulation of bone not using cement NEC
  - W53.8 Other specified prosthetic replacement of articulation of bone not using cement NEC
  - W53.9 Unspecified prosthetic replacement of articulation of bone not using cement NEC
  - W54.1 Primary prosthetic replacement of articulation of bone NEC
  - W54.8 Other specified prosthetic replacement of articulation of bone NEC
  - W54.9 Unspecified prosthetic replacement of articulation of bone NEC
  - W93.1 Primary hybrid prosthetic replacement of hip joint using cemented acetabular component
  - W93.8 Other specified hybrid prosthetic replacement of hip joint using cemented acetabular component
  - W93.9 Unspecified hybrid prosthetic replacement of hip joint using cemented acetabular component
  - W94.1 Primary hybrid prosthetic replacement of hip joint using cemented femoral component
  - W94.8 Other specified hybrid prosthetic replacement of hip joint using cemented femoral component
  - W94.9 Unspecified hybrid prosthetic replacement of hip joint using cemented femoral component
  - W95.1 Primary hybrid prosthetic replacement of hip joint using cement NEC
  - W95.8 Other specified hybrid prosthetic replacement of hip joint using cement
  - W95.9 Unspecified hybrid prosthetic replacement of hip joint using cement
-

|                                                               |                                     |                                                                                   |                                                         |
|---------------------------------------------------------------|-------------------------------------|-----------------------------------------------------------------------------------|---------------------------------------------------------|
| <i>Primary Total Knee Replacement</i>                         | W40.1                               | Primary total prosthetic replacement of knee joint using cement                   |                                                         |
|                                                               | W40.8                               | Other specified total prosthetic replacement of knee joint using cement           |                                                         |
|                                                               | W40.9                               | Unspecified total prosthetic replacement of knee joint using cement               |                                                         |
|                                                               | W41.1                               | Primary total prosthetic replacement of knee joint not using cement               |                                                         |
|                                                               | W41.8                               | Other specified total prosthetic replacement of knee joint not using cement       |                                                         |
|                                                               | W41.9                               | Unspecified total prosthetic replacement of knee joint not using cement           |                                                         |
|                                                               | W42.1                               | Primary total prosthetic replacement of knee joint NEC                            |                                                         |
|                                                               | W42.8                               | Other specified other total prosthetic replacement of knee joint                  |                                                         |
|                                                               | W42.9                               | Unspecified other total prosthetic replacement of knee joint                      |                                                         |
|                                                               | O18.1                               | Primary hybrid prosthetic replacement of knee joint using cement                  |                                                         |
|                                                               | O18.8                               | Other specified hybrid prosthetic replacement of knee joint using cement          |                                                         |
|                                                               | O18.9                               | Unspecified hybrid prosthetic replacement of knee joint using cement              |                                                         |
|                                                               | <i>Resurfacing / Reconstruction</i> | W58.1                                                                             | Primary resurfacing arthroplasty of joint               |
| W58.8                                                         |                                     | Other specified reconstruction of joint                                           | Require combination with site + combination codes to ID |
| W58.9                                                         |                                     | Unspecified other reconstruction of joint                                         | Require combination with site + combination codes to ID |
| <i>Primary unicondylar / unicompartmental knee operations</i> | W52.1                               | Primary prosthetic replacement of articulation of bone using cement NEC           | Require combination with site + combination codes to ID |
|                                                               | W52.8                               | Other specified prosthetic replacement of articulation of other bone using cement | Require combination with site + combination codes to ID |
|                                                               | W52.9                               | Unspecified prosthetic replacement of articulation of other bone using cement     | Require combination with site + combination codes to ID |
|                                                               | W53.1                               | Primary prosthetic replacement of articulation of bone not using cement NEC       | Require combination with site + combination codes to ID |

---

|       |                                                                                   |                                                         |
|-------|-----------------------------------------------------------------------------------|---------------------------------------------------------|
| W53.9 | Unspecified prosthetic replacement of articulation of other bone not using cement | Require combination with site + combination codes to ID |
| W54.0 | Conversion from previous prosthetic replacement of articulation of bone NEC       | Require combination with site + combination codes to ID |
| W54.1 | Primary prosthetic replacement of articulation of bone NEC                        | Require combination with site + combination codes to ID |
| W54.8 | Other specified other prosthetic replacement of articulation of other bone        | Require combination with site + combination codes to ID |
| W54.9 | Unspecified other prosthetic replacement of articulation of other bone            | Require combination with site + combination codes to ID |

---
