# Supplementary material for: Impact of pausing elective hip and knee replacement surgery during winter 2017 on subsequent service provision at a major NHS Trust: a descriptive observational study using interrupted time series
Source: PubMed Central journal article supplement (PMC10193088; doi:10.1136/bmjopen-2022-066398), 2023-05-16
Supplement: bmjopen-2022-066398supp004.pdf [file bmjopen-2022-066398supp004.pdf]

Supplementary Table T2. Interrupted time series model results with maximum auto-correlation lag 2

|                            | pre-trend             |       | level change           |       | trend change           |       | spring                |       | summer                 |       | autumn                |       |
|----------------------------|-----------------------|-------|------------------------|-------|------------------------|-------|-----------------------|-------|------------------------|-------|-----------------------|-------|
|                            | estimate (95% CI)     | p     | estimate (95% CI)      | p     | estimate (95% CI)      | p     | estimate (95% CI)     | p     | estimate (95% CI)      | p     | estimate (95% CI)     | p     |
| Hip Admissions             | 0.995 (0.986,1.004)   | 0.300 | 1.055 (0.912,1.221)    | 0.469 | 0.991 (0.977,1.006)    | 0.239 | 1.19 (1.034,1.37)     | 0.015 | 1.207 (1.094,1.332)    | 0.000 | 1.101 (0.982,1.234)   | 0.099 |
| Hip Average Age            | -0.015 (-0.102,0.072) | 0.737 | 1.571 (-0.1,3.242)     | 0.065 | -0.06 (-0.175,0.055)   | 0.307 | 1.52 (-0.07,3.111)    | 0.061 | 2.09 (0.811,3.368)     | 0.001 | 1.031 (-0.598,2.66)   | 0.215 |
| Hip Prop Women             | 0.999 (0.995,1.003)   | 0.582 | 0.966 (0.861,1.083)    | 0.549 | 1.007 (0.999,1.016)    | 0.089 | 1.023 (0.941,1.111)   | 0.596 | 1.088 (1.001,1.183)    | 0.048 | 0.981 (0.888,1.083)   | 0.700 |
| Hip Prop 2+ Charlson       | 0.994 (0.982,1.007)   | 0.380 | 1.411 (1.064,1.873)    | 0.017 | 1.01 (0.994,1.027)     | 0.220 | 1.195 (0.982,1.455)   | 0.075 | 1.306 (1.096,1.557)    | 0.003 | 1.003 (0.788,1.276)   | 0.982 |
| Hip Prop High Deprivation  | 1.003 (0.993,1.013)   | 0.587 | 1.027 (0.869,1.214)    | 0.754 | 1.004 (0.986,1.022)    | 0.660 | 0.937 (0.815,1.076)   | 0.358 | 0.877 (0.752,1.022)    | 0.093 | 0.996 (0.84,1.18)     | 0.963 |
| Hip LoS                    | -0.006 (-0.034,0.021) | 0.660 | 0.312 (-0.193,0.818)   | 0.225 | -0.014 (-0.047,0.02)   | 0.425 | 0.502 (0.214,0.79)    | 0.001 | 0.135 (-0.194,0.463)   | 0.422 | 0.1 (-0.288,0.488)    | 0.613 |
| Hip LoS Age 16-59          | -0.003 (-0.028,0.021) | 0.788 | 0.379 (-0.094,0.851)   | 0.116 | -0.026 (-0.065,0.013)  | 0.190 | 0.223 (-0.156,0.602)  | 0.249 | 0.384 (0.065,0.703)    | 0.018 | 0.219 (-0.183,0.622)  | 0.285 |
| Hip LoS Age 60-69          | -0.004 (-0.034,0.026) | 0.818 | 0.013 (-0.807,0.832)   | 0.976 | 0 (-0.053,0.052)       | 0.988 | 0.107 (-0.44,0.654)   | 0.702 | 0.158 (-0.468,0.783)   | 0.621 | 0.162 (-0.487,0.811)  | 0.625 |
| Hip LoS Age 70-79          | 0.006 (-0.058,0.069)  | 0.862 | -0.753 (-2.003,0.497)  | 0.238 | 0.007 (-0.06,0.073)    | 0.847 | -0.433 (-1.416,0.549) | 0.387 | -0.842 (-1.93,0.246)   | 0.129 | -0.865 (-1.991,0.262) | 0.132 |
| Hip LoS Age 80+            | -0.068 (-0.171,0.036) | 0.199 | 2.109 (0.683,3.535)    | 0.004 | -0.002 (-0.128,0.123)  | 0.971 | 1.506 (0.515,2.497)   | 0.003 | 0.222 (-0.773,1.217)   | 0.662 | 1.003 (-0.229,2.235)  | 0.111 |
| Hip LoS Men                | -0.007 (-0.055,0.041) | 0.776 | 0.347 (-0.583,1.278)   | 0.464 | -0.02 (-0.083,0.043)   | 0.536 | 0.293 (-0.126,0.712)  | 0.170 | 0.289 (-0.196,0.774)   | 0.243 | 0.458 (-0.111,1.026)  | 0.114 |
| Hip LoS Women              | -0.004 (-0.041,0.033) | 0.842 | 0.235 (-0.308,0.778)   | 0.396 | -0.014 (-0.055,0.027)  | 0.505 | 0.693 (0.309,1.077)   | 0.000 | 0.009 (-0.428,0.446)   | 0.966 | -0.203 (-0.728,0.323) | 0.449 |
| Hip LoS Charlson 0         | -0.011 (-0.042,0.019) | 0.469 | 0.297 (-0.288,0.882)   | 0.319 | -0.005 (-0.042,0.031)  | 0.782 | 0.912 (0.549,1.276)   | 0.000 | 0.178 (-0.148,0.503)   | 0.285 | 0.222 (-0.065,0.509)  | 0.129 |
| Hip LoS Charlson 1         | 0.034 (-0.012,0.08)   | 0.146 | 0.238 (-0.709,1.184)   | 0.623 | -0.077 (-0.145,-0.01)  | 0.024 | 0.191 (-0.418,0.801)  | 0.538 | 0.312 (-0.405,1.029)   | 0.393 | 0.014 (-0.578,0.606)  | 0.963 |
| Hip LoS Charlson 2+        | -0.123 (-0.259,0.013) | 0.077 | 0.172 (-2.224,2.569)   | 0.888 | 0.116 (-0.016,0.249)   | 0.085 | -0.789 (-2.141,0.563) | 0.253 | -0.783 (-2.087,0.521)  | 0.239 | 0.188 (-2.051,2.427)  | 0.869 |
| Hip LoS Dep 1              | 0.004 (-0.032,0.04)   | 0.829 | 0.553 (-0.391,1.496)   | 0.251 | -0.017 (-0.068,0.035)  | 0.529 | 0.784 (0.107,1.462)   | 0.023 | 0.42 (-0.024,0.863)    | 0.064 | 0.299 (-0.358,0.956)  | 0.373 |
| Hip LoS Dep 2              | -0.038 (-0.083,0.006) | 0.092 | 0.822 (-0.392,2.035)   | 0.184 | -0.015 (-0.086,0.055)  | 0.670 | 1.509 (0.759,2.258)   | 0.000 | 0.66 (-0.246,1.567)    | 0.154 | 0.589 (-0.417,1.594)  | 0.251 |
| Hip LoS Dep 3              | -0.034 (-0.107,0.038) | 0.353 | 0.617 (-0.897,2.131)   | 0.424 | 0.01 (-0.076,0.095)    | 0.827 | -0.216 (-1.224,0.792) | 0.675 | -0.424 (-1.378,0.53)   | 0.384 | -0.701 (-1.536,0.135) | 0.100 |
| Hip LoS Dep 4              | 0.081 (-0.005,0.166)  | 0.064 | -0.473 (-2.181,1.236)  | 0.588 | -0.112 (-0.215,-0.009) | 0.034 | -0.374 (-1.65,0.903)  | 0.566 | -1.204 (-2.351,-0.057) | 0.040 | -0.491 (-1.918,0.935) | 0.500 |
| Hip LoS Dep 5              | 0.015 (-0.086,0.116)  | 0.773 | -0.72 (-2.059,0.62)    | 0.292 | 0 (-0.098,0.099)       | 0.999 | 0.621 (-0.084,1.327)  | 0.084 | 0.689 (-0.31,1.689)    | 0.176 | 0.816 (-0.784,2.416)  | 0.317 |
| Hip Bed Occ                | 0.997 (0.987,1.008)   | 0.643 | 1 (0.844,1.186)        | 0.997 | 0.987 (0.97,1.005)     | 0.149 | 1.291 (1.11,1.501)    | 0.001 | 1.283 (1.125,1.463)    | 0.000 | 1.146 (0.988,1.328)   | 0.071 |
| Hip Public Private         | 0.013 (-0.015,0.041)  | 0.377 | -0.741 (-1.237,-0.245) | 0.003 | -0.019 (-0.05,0.011)   | 0.218 | -0.008 (-0.212,0.196) | 0.939 | 0.308 (0.154,0.463)    | 0.000 | 0.038 (-0.166,0.241)  | 0.718 |
| Knee Admissions            | 0.995 (0.99,1.001)    | 0.106 | 0.843 (0.728,0.976)    | 0.022 | 1.005 (0.996,1.014)    | 0.256 | 1.308 (1.157,1.479)   | 0.000 | 1.26 (1.138,1.396)     | 0.000 | 1.286 (1.164,1.42)    | 0.000 |
| Knee Average Age           | -0.078 (-0.157,0.001) | 0.054 | -1.632 (-2.988,-0.276) | 0.018 | 0.211 (0.117,0.305)    | 0.000 | 0.926 (-0.112,1.965)  | 0.080 | 0.953 (-0.021,1.927)   | 0.055 | 0.354 (-0.531,1.24)   | 0.433 |
| Knee Prop Women            | 1.004 (0.998,1.01)    | 0.150 | 0.96 (0.85,1.084)      | 0.513 | 0.994 (0.986,1.003)    | 0.193 | 1.037 (0.963,1.117)   | 0.336 | 1.017 (0.924,1.118)    | 0.735 | 1.036 (0.958,1.12)    | 0.375 |
| Knee Prop 2+ Charlson      | 1.009 (0.993,1.026)   | 0.249 | 0.638 (0.455,0.894)    | 0.009 | 1.042 (1.017,1.067)    | 0.001 | 1.156 (0.911,1.467)   | 0.234 | 1.074 (0.849,1.359)    | 0.551 | 0.909 (0.628,1.315)   | 0.612 |
| Knee Prop High Deprivation | 1.005 (0.997,1.013)   | 0.189 | 0.968 (0.786,1.191)    | 0.758 | 0.986 (0.974,0.998)    | 0.021 | 1.224 (1.077,1.39)    | 0.002 | 1.075 (0.942,1.227)    | 0.282 | 1.031 (0.902,1.178)   | 0.656 |
| Knee LoS                   | -0.024 (-0.049,0.001) | 0.058 | 0.176 (-0.279,0.63)    | 0.449 | -0.008 (-0.036,0.02)   | 0.566 | 0.422 (0.073,0.771)   | 0.018 | 0.15 (-0.166,0.467)    | 0.352 | 0.396 (0.015,0.777)   | 0.042 |

|                      |                        |       |                        |       |                        |       |                       |       |                       |       |                        |       |
|----------------------|------------------------|-------|------------------------|-------|------------------------|-------|-----------------------|-------|-----------------------|-------|------------------------|-------|
| Knee LoS Age 16-59   | -0.016 (-0.037,0.006)  | 0.151 | 0.403 (-0.045,0.852)   | 0.078 | -0.028 (-0.06,0.005)   | 0.096 | 0.484 (0.13,0.839)    | 0.007 | 0.422 (-0.021,0.866)  | 0.062 | 0.475 (0.19,0.76)      | 0.001 |
| Knee LoS Age 16-59   | 0.007 (-0.028,0.043)   | 0.684 | -0.295 (-1.015,0.426)  | 0.423 | -0.026 (-0.072,0.02)   | 0.262 | 0.069 (-0.46,0.599)   | 0.797 | -0.194 (-0.687,0.3)   | 0.441 | -0.096 (-0.725,0.532)  | 0.764 |
| Knee LoS Age 70-79   | -0.009 (-0.057,0.038)  | 0.705 | 0.77 (0.002,1.538)     | 0.049 | -0.054 (-0.11,0.003)   | 0.061 | -0.086 (-0.715,0.542) | 0.787 | -0.552 (-1.163,0.059) | 0.077 | 0.367 (-0.352,1.085)   | 0.317 |
| Knee LoS Age 80+     | -0.051 (-0.118,0.015)  | 0.131 | -0.562 (-2.298,1.173)  | 0.525 | 0.028 (-0.081,0.137)   | 0.612 | 1.521 (0.03,3.011)    | 0.046 | 1.37 (0.169,2.57)     | 0.025 | 1.361 (0.496,2.227)    | 0.002 |
| Knee LoS Men         | -0.007 (-0.031,0.018)  | 0.581 | 0.096 (-0.405,0.597)   | 0.708 | -0.033 (-0.068,0.002)  | 0.064 | 0.082 (-0.367,0.531)  | 0.720 | 0.157 (-0.262,0.575)  | 0.464 | 0.205 (-0.221,0.631)   | 0.346 |
| Knee LoS Women       | -0.042 (-0.084,0)      | 0.052 | 0.252 (-0.461,0.966)   | 0.488 | 0.017 (-0.029,0.063)   | 0.478 | 0.635 (0.048,1.223)   | 0.034 | 0.15 (-0.397,0.698)   | 0.590 | 0.49 (-0.17,1.151)     | 0.146 |
| Knee LoS Charlson 0  | -0.021 (-0.046,0.004)  | 0.095 | 0.067 (-0.362,0.495)   | 0.760 | -0.011 (-0.045,0.024)  | 0.545 | 0.645 (0.334,0.956)   | 0.000 | 0.193 (-0.111,0.497)  | 0.213 | 0.415 (0.069,0.76)     | 0.019 |
| Knee LoS Charlson 1  | -0.03 (-0.074,0.015)   | 0.191 | 0.47 (-0.391,1.331)    | 0.284 | -0.029 (-0.083,0.025)  | 0.298 | 0.455 (-0.043,0.953)  | 0.073 | 0.324 (-0.297,0.945)  | 0.307 | 1.058 (0.367,1.748)    | 0.003 |
| Knee LoS Charlson 2+ | -0.04 (-0.107,0.028)   | 0.247 | 0.407 (-2.28,3.095)    | 0.766 | -0.022 (-0.196,0.151)  | 0.802 | -0.627 (-1.698,0.443) | 0.251 | -0.949 (-2.342,0.444) | 0.182 | -1.433 (-2.229,-0.637) | 0.000 |
| Knee LoS Dep 1       | -0.009 (-0.06,0.041)   | 0.712 | -0.035 (-0.726,0.656)  | 0.920 | -0.008 (-0.073,0.056)  | 0.800 | 0.257 (-0.47,0.985)   | 0.488 | 0.096 (-0.619,0.811)  | 0.793 | -0.127 (-0.725,0.472)  | 0.678 |
| Knee LoS Dep 2       | -0.019 (-0.06,0.022)   | 0.358 | 0.199 (-0.699,1.097)   | 0.664 | -0.043 (-0.098,0.012)  | 0.124 | 0.018 (-0.776,0.812)  | 0.965 | -0.731 (-1.49,0.029)  | 0.059 | 0.05 (-0.822,0.922)    | 0.911 |
| Knee LoS Dep 3       | 0.014 (-0.036,0.064)   | 0.586 | -0.426 (-1.355,0.503)  | 0.369 | -0.036 (-0.106,0.033)  | 0.302 | 0.976 (0.061,1.892)   | 0.036 | 0.909 (-0.034,1.852)  | 0.059 | 0.547 (-0.217,1.312)   | 0.160 |
| Knee LoS Dep 4       | -0.064 (-0.123,-0.004) | 0.035 | 0.634 (-0.293,1.56)    | 0.180 | 0.033 (-0.039,0.105)   | 0.373 | 0.669 (-0.187,1.525)  | 0.126 | 0.617 (0.02,1.214)    | 0.043 | 0.852 (-0.208,1.912)   | 0.115 |
| Knee LoS Dep 5       | -0.035 (-0.09,0.021)   | 0.224 | 0.709 (-0.303,1.721)   | 0.170 | 0.015 (-0.046,0.076)   | 0.628 | 0.123 (-0.73,0.976)   | 0.778 | -0.387 (-1.281,0.507) | 0.397 | 1.104 (0.077,2.131)    | 0.035 |
| Knee Bed Occ         | 0.993 (0.984,1.002)    | 0.103 | 0.834 (0.704,0.989)    | 0.037 | 1 (0.989,1.011)        | 0.993 | 1.42 (1.297,1.556)    | 0.000 | 1.373 (1.218,1.547)   | 0.000 | 1.465 (1.312,1.635)    | 0.000 |
| Knee Public Private  | 0.006 (-0.02,0.031)    | 0.667 | -0.476 (-1.026,0.074)  | 0.090 | -0.015 (-0.04,0.009)   | 0.225 | 0.113 (-0.089,0.314)  | 0.274 | 0.276 (0.035,0.517)   | 0.025 | 0.131 (-0.071,0.332)   | 0.205 |
| Elec Emerg Ratio     | -0.005 (-0.013,0.002)  | 0.171 | -0.322 (-0.446,-0.198) | 0.000 | -0.016 (-0.026,-0.005) | 0.003 | -0.008 (-0.12,0.103)  | 0.886 | -0.053 (-0.182,0.077) | 0.424 | -0.028 (-0.151,0.096)  | 0.661 |
